# Supplementary material for: Study protocol for a prospective, double-blinded, observational study investigating the diagnostic accuracy of an app-based diagnostic health care application in an emergency room setting: the eRadaR trial
Source: PubMed Central journal article supplement — BMJ Open. 2021 Jan 7;11(1):e041396. doi: 10.1136/bmjopen-2020-041396 (PMC7798704; doi:10.1136/bmjopen-2020-041396), 2021-01-07
Supplement: bmjopen-2020-041396.draft_revisions.pdf [file bmjopen-2020-041396.draft_revisions.pdf]

# BMJ Open

BMJ Open is committed to open peer review. As part of this commitment we make the peer review history of every article we publish publicly available.

When an article is published we post the peer reviewers' comments and the authors' responses online. We also post the versions of the paper that were used during peer review. These are the versions that the peer review comments apply to.

The versions of the paper that follow are the versions that were submitted during the peer review process. They are not the versions of record or the final published versions. They should not be cited or distributed as the published version of this manuscript.

BMJ Open is an open access journal and the full, final, typeset and author-corrected version of record of the manuscript is available on our site with no access controls, subscription charges or pay-per-view fees (<http://bmjopen.bmj.com>).

If you have any questions on BMJ Open's open peer review process please email [info.bmjopen@bmj.com](mailto:info.bmjopen@bmj.com)

# BMJ Open

**Study protocol for a prospective, double-blinded, observational study investigating the diagnostic accuracy of an app-based diagnostic health care application in an emergency room setting: the eRadaR-trial**

|                               |                                                                                                                                                                                                                                                                                                                                                                                                                                                                                                                                                                                                                                                                                                                                                                                                                                                                                                                                                                                          |
|-------------------------------|------------------------------------------------------------------------------------------------------------------------------------------------------------------------------------------------------------------------------------------------------------------------------------------------------------------------------------------------------------------------------------------------------------------------------------------------------------------------------------------------------------------------------------------------------------------------------------------------------------------------------------------------------------------------------------------------------------------------------------------------------------------------------------------------------------------------------------------------------------------------------------------------------------------------------------------------------------------------------------------|
| Journal:                      | <i>BMJ Open</i>                                                                                                                                                                                                                                                                                                                                                                                                                                                                                                                                                                                                                                                                                                                                                                                                                                                                                                                                                                          |
| Manuscript ID                 | bmjopen-2020-041396                                                                                                                                                                                                                                                                                                                                                                                                                                                                                                                                                                                                                                                                                                                                                                                                                                                                                                                                                                      |
| Article Type:                 | Protocol                                                                                                                                                                                                                                                                                                                                                                                                                                                                                                                                                                                                                                                                                                                                                                                                                                                                                                                                                                                 |
| Date Submitted by the Author: | 07-Jun-2020                                                                                                                                                                                                                                                                                                                                                                                                                                                                                                                                                                                                                                                                                                                                                                                                                                                                                                                                                                              |
| Complete List of Authors:     | Faqar-Uz-Zaman, S. Fatima; Hospital of the Goethe University Frankfurt Surgery Centre, Department for General, Visceral and Transplant Surgery<br>Filmann, Natalie; Institute of Biostatistics and Mathematical Modeling, Goethe-University, Frankfurt/Main,<br>Mahkovic, Dora; Ljubljana Central Medical School<br>von Wagner, Michael; Goethe University Frankfurt<br>Detemble, Charlotte ; Hospital of the Goethe University Frankfurt Surgery Centre<br>Kippke, Ulf; Hospital of the Goethe University Frankfurt Surgery Centre<br>Marschall, Ursula; BARMER<br>Anantharajah, Luxia ; Hospital of the Goethe University Frankfurt Surgery Centre<br>Baumartz, Philipp; Hospital of the Goethe University Frankfurt Surgery Centre<br>Sobotta, Paula ; Hospital of the Goethe University Frankfurt Surgery Centre<br>Bechstein, Wolf; Hospital of the Goethe University Frankfurt Surgery Centre<br>Schnitzbauer, Andreas; Hospital of the Goethe University Frankfurt Surgery Centre |
| Keywords:                     | ACCIDENT & EMERGENCY MEDICINE, Adult gastroenterology < GASTROENTEROLOGY, Adult surgery < SURGERY                                                                                                                                                                                                                                                                                                                                                                                                                                                                                                                                                                                                                                                                                                                                                                                                                                                                                        |
|                               |                                                                                                                                                                                                                                                                                                                                                                                                                                                                                                                                                                                                                                                                                                                                                                                                                                                                                                                                                                                          |

SCHOLARONE™  
Manuscripts

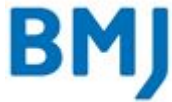

I, the Submitting Author has the right to grant and does grant on behalf of all authors of the Work (as defined in the below author licence), an exclusive licence and/or a non-exclusive licence for contributions from authors who are: i) UK Crown employees; ii) where BMJ has agreed a CC-BY licence shall apply, and/or iii) in accordance with the terms applicable for US Federal Government officers or employees acting as part of their official duties; on a worldwide, perpetual, irrevocable, royalty-free basis to BMJ Publishing Group Ltd ("BMJ") its licensees and where the relevant Journal is co-owned by BMJ to the co-owners of the Journal, to publish the Work in this journal and any other BMJ products and to exploit all rights, as set out in our [licence](#).

The Submitting Author accepts and understands that any supply made under these terms is made by BMJ to the Submitting Author unless you are acting as an employee on behalf of your employer or a postgraduate student of an affiliated institution which is paying any applicable article publishing charge ("APC") for Open Access articles. Where the Submitting Author wishes to make the Work available on an Open Access basis (and intends to pay the relevant APC), the terms of reuse of such Open Access shall be governed by a Creative Commons licence – details of these licences and which [Creative Commons](#) licence will apply to this Work are set out in our licence referred to above.

Other than as permitted in any relevant BMJ Author's Self Archiving Policies, I confirm this Work has not been accepted for publication elsewhere, is not being considered for publication elsewhere and does not duplicate material already published. I confirm all authors consent to publication of this Work and authorise the granting of this licence.

1  
2  
3  
4 **Study protocol for a prospective, double-blinded, observational study**  
5 **investigating the diagnostic accuracy of an app-based diagnostic health care**  
6 **application in an emergency room setting: the eRadaR-trial**  
7  
8  
9

10  
11 S. Fatima Faqar-Uz-Zaman<sup>1</sup>, Natalie Filmann<sup>2</sup>, Dora Mahkovic<sup>3</sup>, Michael von  
12 Wagner<sup>4</sup>, Charlotte Detemble<sup>1</sup>, Ulf Kippke<sup>1</sup>, Ursula Marschall<sup>5</sup>, Luxia Anantharajah<sup>1</sup>,  
13 Philipp Baumartz<sup>1</sup>, Paula Sobotta<sup>1</sup>, Wolf O. Bechstein<sup>1</sup> and Andreas A. Schnitzbauer<sup>1</sup>  
14  
15  
16  
17

18  
19  
20 <sup>1</sup> Department for General, Visceral and Transplant Surgery, Frankfurt University  
21 Hospital, Theodor-Stern-Kai 7, 60590 Frankfurt, Germany  
22

23  
24 <sup>2</sup> Institute of Biostatistics and Mathematical Modeling, Goethe-University Frankfurt,  
25 Germany  
26

27  
28 <sup>3</sup> MCL Medical Center Ljubljana, Ljubljana, Slovenia  
29

30  
31 <sup>4</sup> Executive Department for Medical IT-Systems and Digitalization, Frankfurt  
32 University Hospital, Germany  
33

34  
35 <sup>5</sup> Barmer health insurance, Germany  
36  
37  
38  
39  
40

41 Corresponding author:  
42

43 Prof. Dr. Andreas A. Schnitzbauer, FACS, FEBS  
44

45 Department for General, Visceral and Transplant Surgery  
46

47 Frankfurt University Hospital, Goethe-University Frankfurt/Main  
48

49 Theodor-Stern-Kai 7  
50

51 60590 Frankfurt am Main  
52

53 Phone: +49-69-6301-5253  
54

55 Fax: +49-69-6301-84028  
56

57 Email: [andreas.schnitzbauer@kgu.de](mailto:andreas.schnitzbauer@kgu.de)  
58  
59  
60

## Abstract

**Introduction:** Occurrence of inaccurate or delayed diagnoses is a significant concern in patient care, particularly in emergency medicine, where decision-making is often constrained by high throughput and inaccurate admission diagnoses. Artificial intelligence (AI)-based diagnostic decision support system (DDSS) have been developed to enhance clinical performance by suggesting differential diagnoses to a given case, based on an integrated medical knowledge base and machine learning techniques. The purpose of the study is to evaluate the diagnostic accuracy of Ada<sup>®</sup>, an app-based diagnostic tool, and the impact on patient outcome.

**Methods and analysis:** The eRadaR trial is a prospective, double-blinded study with patients presenting to the emergency room (ER) with abdominal pain. At initial contact in the ER, a structured interview will be performed using the Ada-App<sup>®</sup> and both, patients and attending physicians, will be blinded to the proposed diagnosis lists until trial completion. Throughout the study, clinical data relating to diagnostic findings and types of therapy will be obtained and the follow-up until day 90 will comprise occurrence of complications and overall survival of patients. The primary efficacy of the trial is defined by the percentage of correct diagnoses suggested by Ada<sup>®</sup> compared to the final discharge diagnosis. Further, accuracy and timing of diagnosis will be compared to decision-making of classical doctor-patient interaction. Secondary objectives are complications, length of hospital stay and overall survival.

**Ethics and dissemination:** Ethical approval was received by the independent ethics committee (IEC) of the Goethe-University Frankfurt on 9<sup>th</sup> April 2020 including the patient information material and informed consent form. All protocol amendments must be reported to and adapted by the IEC. The results from this study will be submitted to peer-reviewed journals and reported at suitable national and international meetings.

**Trial registration:** German Clinical Trials Register: DRKS00019098 (registered on 29<sup>th</sup> May 2020).

**Keywords:** Artificial intelligence, diagnostic accuracy, emergency room diagnoses, abdominal pain

## Article Summary

### Strengths and weaknesses of this study

- This is the first prospective study to examine the diagnostic accuracy of an app-based diagnostic tool in an emergency room (ED) and the impact on clinical outcomes.
- The study will be conducted in a real life setting to investigate the performance in a high stress environment and to provide rational for routine clinical application.
- The double-blinded design will avoid bias regarding research findings.
- The primary limitation of an observational design is that only associations can be described, not causal relationship.

## Introduction

Diagnostic errors, comprising inaccurate, delayed or missed diagnoses, are one of the major challenges in public healthcare [1]. In the recent 'Patient Safety Fact File', the World Health Organization (WHO) outlines ten crucial facts about patient safety [2]. Accordingly, adverse events are among the ten leading causes of death and disability, contributing to approximately 10% of patients harmed during hospitalization. Of note, 10% to 20% of adverse events have been quoted to be particularly related to diagnostic failure, causing more harm to patients than medication or treatment errors [3–5]. Further, false or delayed diagnoses are reported to be the most common reason for medical malpractice litigation [6]. Graber *et al.* estimated that diagnostic failures occurred in 5%-15% of cases, depending on the medical specialty with higher percentages assumed in primary care and emergency medicine [7]. Various reasons have been identified to contribute to false diagnoses. Graber concluded that cognitive slips, primarily resulting from faulty information processing and verification, and misguided situational confidence occur most frequently [8, 9].

This is especially evident in ER settings, which often have to deal with high throughputs, fast decision-making and incomplete clinical information in a disruptive environment. In particular, ER overcrowding has been identified as a serious threat to patient safety, resulting in poor clinical outcome and a significant increase in mortality [10].

Previous studies have revealed that more than 40% of admission diagnoses at first presentation to the ER are not concordant with the final diagnosis of the patient [11–13]. That means, that throughout the hospital stay, the patient experiences a change in diagnosis based on a variety of additional diagnostics and reevaluation of initial assumptions, finally leading to the correct diagnosis. In particular, approximately 30% of patients with abdominal pain, being one of the leading cause for visiting the ER, exhibit a discrepancy in diagnosis [14, 15]. In particular, misdiagnosis rate of acute appendicitis, the most frequent reason for acute abdominal pain, has largely remained unchanged over the time and is still associated with a high ratio of negative appendectomies [16]. Inaccurate diagnosing in ERs has been shown to be further associated with increased length of hospital stay, rate of consultations, healthcare cost and risk for mortality and morbidity, contributing to a serious concern to patient safety [11, 13, 17, 18]. Thus, a high degree of diagnostic accuracy can lead to an

1  
2  
3 improvement in quality of patient care. Correct admission diagnoses are crucial for a  
4 reliable triage and process management and critically influence the initial evaluation in  
5 that ER and subsequent clinical course of the patient [19].  
6  
7

8  
9 Digital technologies and artificial intelligence (AI)-based methods have recently  
10 emerged as impressively powerful tools to empower physicians in clinical decision  
11 making and improve healthcare quality. More specifically, diagnostic decision support  
12 systems (DDSS) have demonstrated to facilitate assessment of clinical data input by  
13 using an extensive medical knowledge base [20, 21]. One version of DDSS is Ada®,  
14 an app-based AI-machine learning system which incorporates patients' symptoms and  
15 other findings into its knowledge base and intelligent technology to deliver effective  
16 healthcare [22, 23]. Based on an algorithmic pathway and driven by chief complaints,  
17 the app-based system generates a set of differential diagnosis for a given clinical case.  
18 Several studies have reported that DDSS have the potential to increase diagnostic  
19 performance, obtaining an accuracy rate of 70-96% [24, 25]. In particular, a  
20 retrospective study of rare diseases has demonstrated that Ada suggests accurate  
21 diagnoses earlier than clinical diagnoses in more than half of all cases [23].  
22  
23

24  
25 However, application of the Ada app has not been investigated in a real-life setting,  
26 particularly in ERs, which has to deal with a high stress environment and heavy time  
27 constraints. This app-based method may be a valuable companion in triaging patients  
28 and support clinicians in making decisions more accurate and sooner by  
29 simultaneously reducing risk for medical errors. Therefore, in the present study, we  
30 aim to evaluate the diagnostic ability of Ada in ER settings and examine the impact on  
31 timing of diagnosing.  
32  
33  
34  
35  
36  
37  
38  
39  
40  
41  
42  
43  
44  
45  
46  
47  
48  
49  
50  
51  
52  
53  
54  
55  
56  
57  
58  
59  
60



## Methods and analysis

The eRadaR-trial is designed as a prospective, double-blinded, observational study evaluating the diagnostic accuracy of the Ada-App® in the ER of the Department of General, Visceral and Transplant Surgery of the Frankfurt University Hospital, Germany. This trial is registered as DRKS00019098 in the German Clinical Trials Register and the trial protocol is written in accordance with the current Standard Protocol Items: Recommendations for Interventional Trials (SPIRIT 2013). The SPIRIT checklist is given in Additional file 1.

### Study population and eligibility criteria

All patients presenting to the ER with abdominal pain will form the study population and be screened for trial eligibility. Inclusion criteria comprise: (a.) adults aged  $\geq 18$  years, (b.) patients presenting with abdominal pain to the ER and (c.) patients willing to participate and able to provide written informed consent. The criteria of exclusion are: (a.) intubated patients, (b.) instable patients or (c.) patients with severe injuries requiring immediate medical treatment, (d.) patients unwilling or incapable of providing informed consent. Eligible patients are asked for their participation in the trial and written informed consent will be obtained from themselves. All reasons for exclusion of patients will be recorded in the trial screening log and analyzed accordingly.

### Description of study visits and assessment schedule

Eligible patients will be interviewed by the study team with the Ada-App® based on an algorithmic pathway of questions relating to the symptoms. Throughout the study, the patient, the study team, and the physician treating the patient will be blinded regarding the list of proposed diagnoses by the app. The patient will subsequently be diagnosed by classical doctor-patient interaction and decision-making. The clinical course of the patient will be followed until day 90 after initial contact in the ER. Detailed information about outline of the study and assessment schedule are displayed in Table1 and Figure1.

**Table 1** Schedule of study visits and assessments of the eRadaR study

|                               | Baseline      | Hospital stay*          | Discharge | 90-days FU     |
|-------------------------------|---------------|-------------------------|-----------|----------------|
| Visits                        | V1<br>(Day 0) | V2 and 3<br>(Day 7, 14) | V4        | V5<br>(Day 90) |
| Informed consent              | X             |                         |           |                |
| Eligibility criteria          | X             |                         |           |                |
| Demographic data:             | X             |                         |           | X              |
| a) Charlson Comorbidity Index | X             |                         |           |                |
| b) RAI-C score                |               |                         |           |                |
| Ada diagnosis list            | X             |                         |           |                |
| ICD-10 diagnoses              | X             |                         | X         | X              |
| Symptoms                      | X             |                         |           |                |
| Diagnostics**                 |               | X                       | X         |                |
| Therapy and OPS-code          |               | X                       | X         |                |
| Rate of consultations         |               |                         | X         |                |
| Complications (CCI)           |               | X                       | X         | X              |
| Length of hospital stay       |               |                         | X         |                |
| Overall survival              |               |                         |           | X              |

\* Visit 2 or 3 are left out, if the patient is discharged before

\*\* Diagnostics include:

a) Routine blood samples (C-reactive protein, White blood cells, Hemoglobin, Platelets, Sodium, Potassium, Creatinine, Albumin, Bilirubin, INR)

b) Instrumental diagnostics (Ultrasound, Chest/Abdominal CT/MRI, ECG, Endoscopy)

RAI-C = Risk Analysis C score; ICD = International Classification of Diseases; OPS = Operations and Procedures;

CCI = Comprehensive Complication Index, FU = Follow-up, V = visit

### ***Patient presenting to the ED (Visit 1)***

After enrollment in the trial, a structured interview with the Ada-App® will be conducted and baseline data will be assessed including demographic data according to the Carlson Comorbidity Index and the Risk Analysis Index-C score (RAI-C score), the patients' symptoms and ICD-10 diagnoses list [26–28]. Participants are then diagnosed and treated according to the standard of care by the attending physician of the ER. As this is a double-blinded study to patients and treating physicians, Ada-App®

1  
2  
3 diagnoses lists will be randomly allocated to a study-ID and then manually transferred  
4 into the electronic case report forms (eCRF). The trial personnel will be blinded until  
5 the end of the study to avoid bias regarding subsequent diagnoses and treatment of  
6 the patient, except of the interim analysis, which is mentioned in the section of  
7 statistical analysis.  
8  
9

### 10 11 12 ***Hospital stay (Visit 2, day 7)*** 13

14 This visit is performed on day 7, after the patient is admitted to the hospital. Data about  
15 diagnoses and therapies are assessed comprising laboratory results (i.e. C-reactive  
16 protein, white blood cells, platelets, hemoglobin, bilirubin, creatinine, sodium and  
17 potassium, albumin, INR), computer-assisted diagnostics (i.e. ultrasound,  
18 chest/abdominal CT/MRI, ECG, endoscopy), type of therapy (conservative,  
19 interventional or surgery), OPS-code of therapies and complications according to the  
20 Comprehensive Complication Index (CCI) together with the date of occurrence [29]. If  
21 the patient has not been admitted to the hospital or is discharged before day 7, visit 2  
22 is left out.  
23  
24  
25  
26  
27  
28  
29

### 30 31 ***Hospital stay (Visit 3, day 14)*** 32

33 Visit 3 is performed on day 14 after patient's admission and assessment schedule is  
34 equivalent to visit 2. If the patient is discharged before day 14, visit 3 is left out.  
35  
36

### 37 ***Discharge (Visit 4)*** 38

39 At discharge, data including the final ICD-10 diagnosis and the timing of diagnosis will  
40 be recorded to subsequently analyze the accuracy and the timing of the Ada-App®  
41 compared to the classical doctor-patient-encounter. Further data items include  
42 diagnostics (laboratory, instrumental), OPS-codes and type of therapies, complications  
43 according to CCI, length of hospital stay, overall health cost, rate of consultation.  
44  
45  
46  
47

### 48 49 ***Follow-up (Visit 5)*** 50

51 The follow-up will be performed as a structured telephone interview or in person on  
52 day 90 and will encompass following data items: demographic data according to the  
53 RAI-C score, complication assessment according to CCI and overall survival.  
54  
55

### 56 57 **Interventions** 58

59 As this is an observational, double-blinded, prospective study, no experimental or  
60 control interventions are conducted.

## Endpoints

### *Primary endpoint*

The primary endpoint of this study is to evaluate the diagnostic accuracy of the Ada-App<sup>®</sup> by comparing the decision-making of the classical doctor-patient interaction with the diagnoses proposed by the app-based algorithm.

### *Secondary endpoint*

Secondary endpoints of this study consist of the following: timing of final discharge diagnosis and time to treatment during hospital stay, comparing accurate diagnoses with discharge diagnoses as descriptive assessments, the occurrence of complications according to the CCI, total length of stay in hospital from initial contact in the ER until discharge, patient morbidity and mortality at day 90, overall health cost analysis and consultation rate. Further endpoints are displayed in the description of assessment schedule (Table1).

## Measurement methods

For data capture, following measurement methods will be used:

1. Primary outcome measurement will be performed using the Ada-App<sup>®</sup> which will deliver a set of differential diagnoses to a given clinical case [23]. Based on an algorithmic questionnaire and machine learning technologies, the Ada chatbot assesses symptoms of the patient, similar to the anamnestic techniques and clinical reasoning of physicians. Patients' data are integrated into an extensive knowledge base, which has been specifically designed by medical doctors by incorporating validated disease models and comprehensive medical literature. Then, differential diagnoses are generated and ranked in order considering two features: the probability, based on epidemiologic data, and the best match between the diagnosis and the given symptoms. Through AI-based methods and multiple feedback loops, the Ada<sup>®</sup> knowledge base grows after each interaction and diagnostic ability improves continuously.
2. The occurrence of complications as secondary outcomes will be evaluated and analyzed according to the Comprehensive Complication Index (CCI) [29]. The CCI represents the standard assessment of postoperative morbidity and comprises all complications occurring during a patient's course based on the Clavien-Dindo classification (CDC). Compared to the CDC, which ranks complications based on

1  
2  
3 the severity of the therapeutic consequence and grades them in 5 levels, the CCI  
4 uses a formula to integrate all complications, ranging them from 0 ('no  
5 complication') to 100 ('death') [30]. This advanced approach enables comparison  
6 of patients harboring more than one complication and takes more subtle differences  
7 into consideration.  
8  
9

- 10  
11  
12 3. For assessment of comorbid diseases and frailty-associated risk in a surgical  
13 population we will use the Charlson Comorbidity Index and the RAI-C score.  
14

### 15 **Risk-Benefit assessment**

16  
17  
18 This is an observational, non-interventional study and does not comprise any specific  
19 risk for the patient, as data obtained with the app are not used in the ER standard of  
20 care. Therefore, there is no special need for additional safety management. A delay in  
21 the diagnosis and treatment of patients presenting to the ER is not expected, as the  
22 app-based interview will not require more than 10 minutes and will exclusively be  
23 performed in the waiting zone of the ER by the study team. Baseline assessment  
24 (during visit 1) will directly be conducted after patient has been registered at the ER  
25 and given informed consent. Besides that, instable patients requiring immediate  
26 medical care are excluded from the study beforehand.  
27  
28  
29  
30  
31  
32  
33

### 34 **Data management and data safety**

35  
36 The investigators will design and produce electronic case report forms (eCRF) for  
37 protocol-required data collection. All information will be entered into these eCRFs by  
38 authorized and trained members of the study team and systematically checked for  
39 accuracy and completeness. Staff members with responsibilities for data collection or  
40 those, having access to the database will be enrolled in a delegation log. Patients' data  
41 collected during the trial will be recorded in pseudonymized form by solely using  
42 individual identification codes.  
43  
44  
45  
46  
47  
48

49 For data assessment using the Ada-App®, a specified iPad will be provided, which will  
50 be registered at the Frankfurt University Hospital and will be exclusively used for the  
51 purpose of this trial. Clinical data will be documented pseudonymously by using a  
52 combination of a random number from 1 to 450 and the patient's year of birth.  
53 Participants are then asked to answer the questionnaire of the Ada-App® preferably by  
54 themselves or otherwise assisted by the study team. The diagnoses will be manually  
55 transferred into the eCRF of the related patient after trial completion and unblinding.  
56  
57  
58  
59  
60

1  
2  
3 All trial data obtained will be integrated in a statistical analysis software and analyzed  
4 by the Institute of Biostatistics and Mathematical Modeling Frankfurt.  
5  
6

### 7 **Publication policy**

8  
9 The results of this trial will be submitted for publication in a peer-reviewed journal in a  
10 summarized anonymized manner. The study is scientifically supported by the Barmer  
11 health insurance company. Barmer will act as a scientific advisor regarding the conduct  
12 of the study, will be involved in the process of interpreting the data and in the  
13 publication and public distribution process of the study after trial completion. However,  
14 there will be no raw data sharing or financial support by the institution.  
15  
16  
17  
18  
19

### 20 **Statistical analysis**

#### 21 ***Interim analysis***

22  
23 One formal unblinded interim analysis of the trial data is planned to be performed after  
24 enrollment of about 200 patients to evaluate the diagnostic accuracy of the Ada-App®  
25 with 90-days follow-up information. Statistical analysis will be performed by the  
26 responsible study biometrician using a significance level of  $\alpha = 0.001$  and a  
27 subsequent report will be written. These results will be discussed with the investigators  
28 and the study team in a staff meeting and the continuation of the trial will be considered.  
29  
30  
31  
32  
33  
34  
35

#### 36 **Sample size calculation and study duration**

37  
38 The assumptions that were made, was that more than 30% of the admission diagnoses  
39 are not consistent with the final discharge diagnosis and hypothesized that the Ada-  
40 App® will increase the diagnostic accuracy from 70% to a rate of 85%. Providing a  
41 power of 90% and a two-sided significance level of  $\alpha$  5%, a target sample size of  
42  $N = 405$  patients has to be recruited to detect the targeted effect. With an estimated  
43 dropout rate of 10%, we plan to recruit  $N = 450$  patients in this trial. Furthermore, we  
44 expect the width of the confidence intervals for the diagnostic accuracy to be 0.1 at  
45 maximum (0.09 with an estimated diagnostic accuracy of 0.7, 0.07 with an estimated  
46 diagnostic accuracy of 0.85).  
47  
48  
49  
50  
51  
52  
53

54 This trial is anticipated to start in September 2020 and the duration of patient's  
55 participation is 3 months including follow-up. To achieve the required sample size of  
56 patients, trial completion is expected to be in 12 months (August 2020).  
57  
58  
59

### 60 **Ethical and legal aspects, consent**

1  
2  
3 The eRadaR trial will be conducted in accordance with the Declaration of Helsinki and  
4 the international conference of harmonization good clinical practice (ICH-GCP)  
5 guidelines. After a patient has been identified to meet eligibility criteria, the patient will  
6 be informed about the aim, outline and individual risk of the study and the informed  
7 consent will be given. After a sufficient period the patient can then sign the informed  
8 consent and will receive a signed copy.  
9  
10  
11  
12

### 13 **Patient and Public involvement**

14  
15  
16 Patients were not involved in the development of the research question or study  
17 design. They will however be involved in visit 1 and will be interviewed by the study  
18 team using the Ada-App® . Further, the follow-up (visit 5) will be performed as a  
19 telephone interview or in person with the patients for data assessment.  
20  
21  
22  
23  
24  
25  
26  
27  
28  
29  
30  
31  
32  
33  
34  
35  
36  
37  
38  
39  
40  
41  
42  
43  
44  
45  
46  
47  
48  
49  
50  
51  
52  
53  
54  
55  
56  
57  
58  
59  
60

## Discussion

Diagnostic errors have been identified as a serious threat to patient safety, leading to preventable adverse events, particularly in ERs with a disruptive environment. AI-based tools and algorithms have the potential to substantially reduce diagnostic failures, achieving high rates of diagnostic accuracy, which rivals the capability of clinicians.

A previous study provides an overview about main types of existing tools, which are classified in categories related to the targeted step of diagnostic processing [25]. Over the past few decades, a number of computerized DDSS have been developed, exhibiting promising diagnostic efficacy. Bond *et al.* evaluated four current DDSS using clinical cases from the *New England Journal of Medicine*, demonstrating that Isabel and Dxplain achieve the strongest performance [31]. Compared to former programs, second generation DDSS are far more powerful, providing more accurate suggestions with increasing complexity, while concomitantly requiring less time for diagnosing [21, 24]. This is primarily essential in an era of ER crowding, where fast and accurate triaging is necessary to prioritize critically ill patients and to optimize resource allocation [8]. Stewart *et al.* recently summarized various fields of AI application becoming relevant in the emergency medicine, including imaging, decision-making and outcome prediction [32]. In terms of triaging, a machine learning based tool efficiently predicts critical patient outcome, equivalent to the classically used Emergency Severity Index [33]. In a prospective, multi-center study, the DDSS Isabel achieved high accuracy in diagnosing patients presenting to the ER, suggesting the final discharge diagnosis in 95% of cases [34]. Another clinical decision support system has been evaluated in patients presenting with acute abdominal pain aiming to identify high risk patients for acute appendicitis [35]. Based on automated methods and an integrated risk calculator, patient data was assessed from the electronic health record (EHR) and management strategies suggested according to the risk level. Incorporation into EHR represents one of the most recent advances in the development of DDSS using 'natural language processing' techniques, which matches entered clinical data with the underlying knowledge base [36]. This might facilitate assessment of larger volumes of data, save more time and might increase acceptance of DDSS in clinical workflow.

However, in most of these trials using clinical support systems, impact on patient outcome or on healthcare costs were not assessed. Although diagnoses suggested by



1  
2  
3 DDSS mostly contained the correct diagnosis and achieved high level of users'  
4 satisfaction, relevance and specificity of extensive lists were low [21, 24, 31]. Long lists  
5 may lead to distraction or to unnecessary diagnostic with increased risk for iatrogenic  
6 injuries and costs. In general, despite the given potential efficacy of DDSS, widespread  
7 acceptance for implementation of DDSS into the routine clinical practice is evolving  
8 scarcely [37]. Studies focusing on AI-based diagnostic tools are generally designed  
9 heterogeneously and are often of poor quality, making it difficult to recommend  
10 widespread evidence-based clinical application [21, 25]. While most of the current trials  
11 demonstrated high diagnostic accuracy in retrospective and simulated cases, only few  
12 studies evaluated their performance in real clinical settings, particularly in high stress  
13 environments like ERs. Thus, further validations in prospective studies are required to  
14 investigate the diagnostic efficiency and utility of DDSS and their impact on routine  
15 clinical decision-making and patient outcome.

### 26 **Trial status**

27  
28 Ethical approval for this trial was granted by an independent ethics committee (IEC) of  
29 the Goethe-University Frankfurt on 9<sup>th</sup> April 2020 and anticipated trial start date is  
30 September 2020.  
31

### 34 **Abbreviations**

35  
36 AI, Artificial Intelligence; App, Application; CCI, Comprehensive Complication Index;  
37 CDC, Clavien-Dindo classification; DRKS, Deutsches Register Klinische Studien  
38 (German Clinical Trials Register); eCRF, electronic case report form; DDSS,  
39 Diagnostic Decision Support System; ER, Emergency Room; EHR, Electronic Health  
40 Record; FU, Follow-Up; ICD-10, International Classification of Diseases; ICH-GCP,  
41 International Conference of Harmonisation, Good Clinical Practice; IEC, Independent  
42 ethics committee; OPS, Operations and Procedures; RAI-C, Risk Analysis Index-C  
43 score.  
44  
45  
46  
47  
48  
49

### 51 **Acknowledgements**

52  
53 We would like to thank Rene Wendel, Doreen Giannico, Dr. Johannes Masseli, Prof.  
54 Stefan Zeuzem and the whole administrative and medical team of the central  
55 emergency room of the Frankfurt University Hospital for their support.  
56  
57

58  
59 We further are grateful for our established scientific support with the Barmer health  
60 care insurance company.

## **Funding**

There is no funding for this trial from third parties or grants. This is an investigator-initiated trial.

## **Competing interest**

No competing interests were detected for the specific trial.

## **Author Contributions**

SFF has written the manuscript, was involved in writing the protocol and is the clinical lead surgeon for the trial.

NF performed the sample size calculation for the trial and was involved in drafting the protocol and the manuscript.

MvW supported the trial as Chief Medical Informatics Officer (CMIO) of the hospital, and was involved in drafting the protocol and the manuscript

CD and DM were involved in creating the idea and drafting the protocol and the manuscript and prepared the CRF logistics.

UK is the quality manager of the surgical department and supervised implementation of the project in the ER.

UM is the BARMER health insurance representative and is an external advisor to the trial. She drafted the protocol and the manuscript.

LA, PB, PS are medical students triaging the patients and putting up logistics in the ER. They all were involved in creating the idea and shaping the project.

WOB gave valuable input into the project, supports it majorly as chair of the department and creates a culture for innovative projects. He further drafted the protocol and manuscript.

AAS had the idea for the project, leads the trial group and links all parties involved. He is the responsible principal investigator for the trial.

## **Availability of data and materials**

Data and material will be available after an adequate research proposal has been made and reviewed by the responsible persons at the University. The requests will be forwarded to our Ethics committee and the requesting party will be responsible to get

1  
2  
3 permission to do post-hoc analysis and will be also liable for any costs arising from the  
4 requests.  
5

6  
7 **Consent for publication**  
8

9 All authors read and consented on the publication of the current version of this  
10 manuscript.  
11  
12  
13  
14  
15  
16  
17  
18  
19  
20  
21  
22  
23  
24  
25  
26  
27  
28  
29  
30  
31  
32  
33  
34  
35  
36  
37  
38  
39  
40  
41  
42  
43  
44  
45  
46  
47  
48  
49  
50  
51  
52  
53  
54  
55  
56  
57  
58  
59  
60

For peer review only

## References

1. Balla J, Heneghan C, Goyder C, Thompson M. Identifying early warning signs for diagnostic errors in primary care: a qualitative study. *BMJ Open* 2012.
2. World Health Organization. Patient Safety and Risk Management Service Delivery and Safety. Accessed Sept 2019. [https://www.who.int/features/factfiles/patient\\_safety/en/](https://www.who.int/features/factfiles/patient_safety/en/).
3. Kohn LT, Corrigan JM, Donaldson MS, editors. *To Err is Human: Building a Safer Health System*. Washington (DC); 2000.
4. Bhasale AL, Miller GC, Reid SE, Britt HC. Analysing potential harm in Australian general practice: an incident-monitoring study. *Med J Aust*. 1998;169.
5. Leape LL, Brennan TA, Laird N, Lawthers AG, Localio AR, Barnes BA, et al. The nature of adverse events in hospitalized patients. Results of the Harvard Medical Practice Study II. *N Engl J Med*. 1991;324.
6. Studdert DM, Mello MM, Gawande AA, Gandhi TK, Kachalia A, Yoon C, et al. Claims, errors, and compensation payments in medical malpractice litigation. *N Engl J Med*. 2006;354.
7. Berner ES, Graber ML. Overconfidence as a cause of diagnostic error in medicine. *Am J Med*. 2008;121.
8. Hautz SC, Schuler L, Kämmer JE, Schaubert SK, Ricklin ME, Sauter TC, et al. Factors predicting a change in diagnosis in patients hospitalised through the emergency room: a prospective observational study. *BMJ Open*. 2016;6.
9. Graber ML, Franklin N, Gordon R. Diagnostic error in internal medicine. *Arch Intern Med*. 2005;165.
10. Morley C, Unwin M, Peterson GM, Stankovich J, Kinsman L. Emergency department crowding: A systematic review of causes, consequences and solutions. *PLoS ONE*. 2018;13.
11. Eames J, Eisenman A, Schuster RJ. Disagreement between emergency department admission diagnosis and hospital discharge diagnosis: mortality and morbidity. *Diagnosis (Berl)*. 2016;3.

12. Ben-Assuli O, Sagi D, Leshno M, Ironi A, Ziv A. Improving diagnostic accuracy using EHR in emergency departments: A simulation-based study. *J Biomed Inform.* 2015;55.
13. Bernhard M, Raatz C, Zahn P, Merker A, Gries A. Validity of admission diagnoses as process-driving criteria. Influence on length of stay and consultation rate in emergency departments. *Anaesthesist.* 2013;62.
14. Macaluso CR, McNamara RM. Evaluation and management of acute abdominal pain in the emergency department. *Int J Gen Med.* 2012;5.
15. Chiu HS, Chan KF, Chung CH, Ma K, Au KW. A Comparison of Emergency Department Admission Diagnoses and Discharge Diagnoses: Retrospective Study. *Hong Kong Journal of Emergency Medicine.* 2003;10.
16. Kryzauskas M, Danys D, Poskus T, Mikalauskas S, Poskus E, Jotautas V, et al. Is acute appendicitis still misdiagnosed? *Open Med (Wars).* 2016;11.
17. Johnson T, McNutt R, Odwazny R, Patel D, Baker S. Discrepancy between admission and discharge diagnoses as a predictor of hospital length of stay. *J Hosp Med.* 2009;4.
18. McWilliams A, Tapp H, Barker J, Dulin M. Cost analysis of the use of emergency departments for primary care services in Charlotte, North Carolina. *N C Med J.* 2011;72.
19. Mistry B, Stewart De Ramirez S, Kelen G, Schmitz PSK, Balhara KS, Levin S, et al. Accuracy and Reliability of Emergency Department Triage Using the Emergency Severity Index: An International Multicenter Assessment. *Ann Emerg Med.* 2018;71.
20. Middleton B, Sittig DF, Wright A. Clinical Decision Support: a 25 Year Retrospective and a 25 Year Vision. *Yearb Med Inform.* 2016;Suppl 1.
21. Riches N, Panagioti M, Alam R, Cheraghi-Sohi S, Campbell S, Esmail A, Bower P. The Effectiveness of Electronic Differential Diagnoses (DDX) Generators: A Systematic Review and Meta-Analysis. *PLoS ONE.* 2016;11.
22. Jungmann SM, Klan T, Kuhn S, Jungmann F. Accuracy of a Chatbot (Ada) in the Diagnosis of Mental Disorders: Comparative Case Study With Lay and Expert Users. *JMIR Form Res.* 2019;3.

23. Ronicke S, Hirsch MC, Türk E, Larionov K, Tientcheu D, Wagner AD. Can a decision support system accelerate rare disease diagnosis? Evaluating the potential impact of Ada DX in a retrospective study. *Orphanet J Rare Dis.* 2019;14.
24. Graber ML, Mathew A. Performance of a web-based clinical diagnosis support system for internists. *J Gen Intern Med.* 2008;23 Suppl 1.
25. El-Kareh R, Hasan O, Schiff GD. Use of health information technology to reduce diagnostic errors. *BMJ Qual Saf.* 2013;22 Suppl 2.
26. Hirsch JA, Leslie-Mazwi TM, Nicola GN, Oklu R, Schoppe KA, Silva E, Manchikanti L. The ICD-10 system: a gift that keeps on taking. *J Neurointerv Surg.* 2015;7.
27. Hall DE, Arya S, Schmid KK, Blaser C, Carlson MA, Bailey TL, et al. Development and Initial Validation of the Risk Analysis Index for Measuring Frailty in Surgical Populations. *JAMA Surg.* 2017;152.
28. Charlson M, Szatrowski TP, Peterson J, Gold J. Validation of a combined comorbidity index. *J Clin Epidemiol.* 1994;47.
29. Clavien P-A, Vetter D, Staiger RD, Slankamenac K, Mehra T, Graf R, Puhan MA. The Comprehensive Complication Index (CCI®): Added Value and Clinical Perspectives 3 Years "Down the Line". *Ann Surg.* 2017;265.
30. Clavien PA, Barkun J, Oliveira ML de, Vauthey JN, Dindo D, Schulick RD, et al. The Clavien-Dindo classification of surgical complications: five-year experience. *Ann Surg.* 2009;250.
31. Bond WF, Schwartz LM, Weaver KR, Levick D, Giuliano M, Graber ML. Differential diagnosis generators: an evaluation of currently available computer programs. *J Gen Intern Med.* 2012;27.
32. Stewart J, Sprivulis P, Dwivedi G. Artificial intelligence and machine learning in emergency medicine. *Emerg Med Australas.* 2018;30.
33. Levin S, Toerper M, Hamrock E, Hinson JS, Barnes S, Gardner H, et al. Machine-Learning-Based Electronic Triage More Accurately Differentiates Patients With Respect to Clinical Outcomes Compared With the Emergency Severity Index. *Ann Emerg Med.* 2018;71.

- 1  
2  
3 34. Ramnarayan P, Cronje N, Brown R, Negus R, Coode B, Moss P, et al. Validation  
4 of a diagnostic reminder system in emergency medicine: a multi-centre study.  
5 Emerg Med J. 2007;24.  
6  
7  
8  
9 35. Ekstrom HL, Kharbanda EO, Ballard DW, Vinson DR, Vazquez-Benitez G,  
10 Chettipally UK, et al. Development of a Clinical Decision Support System for  
11 Pediatric Abdominal Pain in Emergency Department Settings Across Two Health  
12 Systems Within the HCSRN. EGEMS (Wash DC) 2019.  
13  
14  
15  
16 36. Liang H, Tsui BY, Ni H, Valentim CCS, Baxter SL, Liu G, et al. Evaluation and  
17 accurate diagnoses of pediatric diseases using artificial intelligence. Nat Med.  
18 2019;25.  
19  
20  
21  
22 37. Shortliffe EH, Sepúlveda MJ. Clinical Decision Support in the Era of Artificial  
23 Intelligence. JAMA. 2018;320.  
24  
25  
26  
27  
28  
29  
30  
31  
32  
33  
34  
35  
36  
37  
38  
39  
40  
41  
42  
43  
44  
45  
46  
47  
48  
49  
50  
51  
52  
53  
54  
55  
56  
57  
58  
59  
60

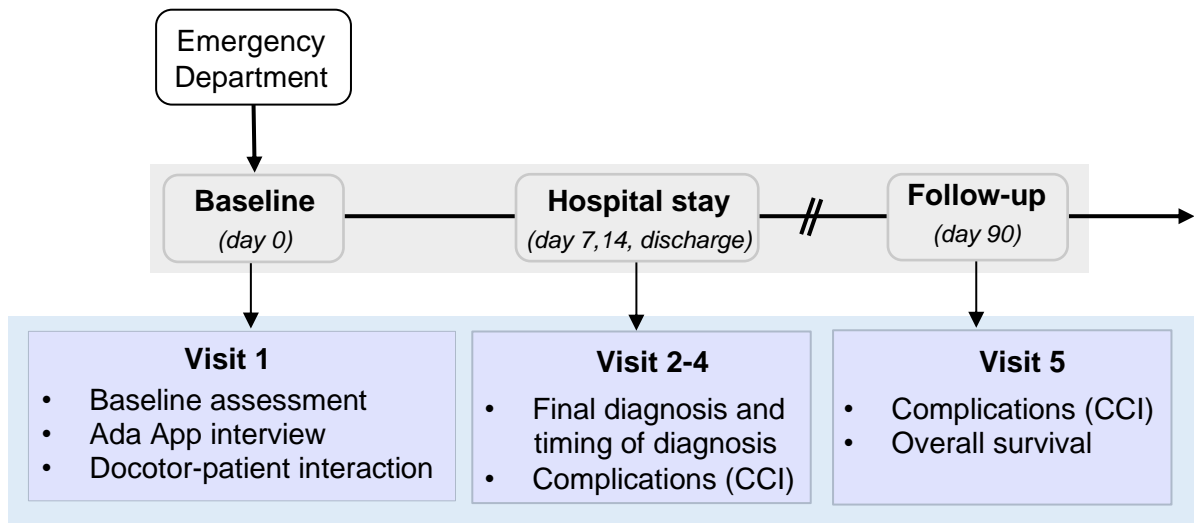

peer review only



# Reporting checklist for protocol of a clinical trial.

Based on the SPIRIT guidelines.

## Instructions to authors

Complete this checklist by entering the page numbers from your manuscript where readers will find each of the items listed below.

Your article may not currently address all the items on the checklist. Please modify your text to include the missing information. If you are certain that an item does not apply, please write "n/a" and provide a short explanation.

Upload your completed checklist as an extra file when you submit to a journal.

In your methods section, say that you used the SPIRIT reporting guidelines, and cite them as:

Chan A-W, Tetzlaff JM, Altman DG, Laupacis A, Gøtzsche PC, Krleža-Jerić K, Hróbjartsson A, Mann H, Dickersin K, Berlin J, Doré C, Parulekar W, Summerskill W, Groves T, Schulz K, Sox H, Rockhold FW, Rennie D, Moher D. SPIRIT 2013 Statement: Defining standard protocol items for clinical trials. *Ann Intern Med.* 2013;158(3):200-207

|                                             | Reporting Item                                                                                                                  | Page Number             |
|---------------------------------------------|---------------------------------------------------------------------------------------------------------------------------------|-------------------------|
| <b>Administrative information</b>           |                                                                                                                                 |                         |
| Title                                       | <a href="#">#1</a> Descriptive title identifying the study design, population, interventions, and, if applicable, trial acronym | 1                       |
| Trial registration                          | <a href="#">#2a</a> Trial identifier and registry name. If not yet registered, name of intended registry                        | 2                       |
| Trial registration: data set                | <a href="#">#2b</a> All items from the World Health Organization Trial Registration Data Set                                    | n/a                     |
| Protocol version                            | <a href="#">#3</a> Date and version identifier                                                                                  | 24/03/2020, version 2.0 |
| Funding                                     | <a href="#">#4</a> Sources and types of financial, material, and other support                                                  | 15                      |
| Roles and responsibilities: contributorship | <a href="#">#5a</a> Names, affiliations, and roles of protocol contributors                                                     | 1, 15                   |

|    |                           |                     |                                                                   |             |
|----|---------------------------|---------------------|-------------------------------------------------------------------|-------------|
| 1  | Roles and                 | <a href="#">#5b</a> | Name and contact information for the trial sponsor                | 1           |
| 2  | responsibilities:         |                     |                                                                   |             |
| 3  | sponsor contact           |                     |                                                                   |             |
| 4  | information               |                     |                                                                   |             |
| 5  |                           |                     |                                                                   |             |
| 6  |                           |                     |                                                                   |             |
| 7  |                           |                     |                                                                   |             |
| 8  | Roles and                 | <a href="#">#5c</a> | Role of study sponsor and funders, if any, in study design;       | n/a, no     |
| 9  | responsibilities:         |                     | collection, management, analysis, and interpretation of data;     | sponsors or |
| 10 | sponsor and funder        |                     | writing of the report; and the decision to submit the report for  | funders     |
| 11 |                           |                     | publication, including whether they will have ultimate            |             |
| 12 |                           |                     | authority over any of these activities                            |             |
| 13 |                           |                     |                                                                   |             |
| 14 |                           |                     |                                                                   |             |
| 15 |                           |                     |                                                                   |             |
| 16 | Roles and                 | <a href="#">#5d</a> | Composition, roles, and responsibilities of the coordinating      | n/a         |
| 17 | responsibilities:         |                     | centre, steering committee, endpoint adjudication committee,      |             |
| 18 | committees                |                     | data management team, and other individuals or groups             |             |
| 19 |                           |                     | overseeing the trial, if applicable (see Item 21a for data        |             |
| 20 |                           |                     | monitoring committee)                                             |             |
| 21 |                           |                     |                                                                   |             |
| 22 |                           |                     |                                                                   |             |
| 23 |                           |                     |                                                                   |             |
| 24 | <b>Introduction</b>       |                     |                                                                   |             |
| 25 |                           |                     |                                                                   |             |
| 26 |                           |                     |                                                                   |             |
| 27 | Background and            | <a href="#">#6a</a> | Description of research question and justification for            | 4-5         |
| 28 | rationale                 |                     | undertaking the trial, including summary of relevant studies      |             |
| 29 |                           |                     | (published and unpublished) examining benefits and harms          |             |
| 30 |                           |                     | for each intervention                                             |             |
| 31 |                           |                     |                                                                   |             |
| 32 |                           |                     |                                                                   |             |
| 33 |                           |                     |                                                                   |             |
| 34 | Background and            | <a href="#">#6b</a> | Explanation for choice of comparators                             | n/a         |
| 35 | rationale: choice of      |                     |                                                                   |             |
| 36 | comparators               |                     |                                                                   |             |
| 37 |                           |                     |                                                                   |             |
| 38 |                           |                     |                                                                   |             |
| 39 | Objectives                | <a href="#">#7</a>  | Specific objectives or hypotheses                                 | 2           |
| 40 |                           |                     |                                                                   |             |
| 41 | Trial design              | <a href="#">#8</a>  | Description of trial design including type of trial (eg, parallel | 6-9         |
| 42 |                           |                     | group, crossover, factorial, single group), allocation ratio, and |             |
| 43 |                           |                     | framework (eg, superiority, equivalence, non-inferiority,         |             |
| 44 |                           |                     | exploratory)                                                      |             |
| 45 |                           |                     |                                                                   |             |
| 46 |                           |                     |                                                                   |             |
| 47 |                           |                     |                                                                   |             |
| 48 | <b>Methods:</b>           |                     |                                                                   |             |
| 49 | <b>Participants,</b>      |                     |                                                                   |             |
| 50 | <b>interventions, and</b> |                     |                                                                   |             |
| 51 | <b>outcomes</b>           |                     |                                                                   |             |
| 52 |                           |                     |                                                                   |             |
| 53 |                           |                     |                                                                   |             |
| 54 |                           |                     |                                                                   |             |
| 55 | Study setting             | <a href="#">#9</a>  | Description of study settings (eg, community clinic, academic     | 6           |
| 56 |                           |                     | hospital) and list of countries where data will be collected.     |             |
| 57 |                           |                     | Reference to where list of study sites can be obtained            |             |
| 58 |                           |                     |                                                                   |             |
| 59 |                           |                     |                                                                   |             |
| 60 |                           |                     |                                                                   |             |

|    |                      |                      |                                                                                                                                                                                                                                                                                                                                                                                |                               |
|----|----------------------|----------------------|--------------------------------------------------------------------------------------------------------------------------------------------------------------------------------------------------------------------------------------------------------------------------------------------------------------------------------------------------------------------------------|-------------------------------|
| 1  | Eligibility criteria | <a href="#">#10</a>  | Inclusion and exclusion criteria for participants. If applicable, eligibility criteria for study centres and individuals who will perform the interventions (eg, surgeons, psychotherapists)                                                                                                                                                                                   | 6                             |
| 2  |                      |                      |                                                                                                                                                                                                                                                                                                                                                                                |                               |
| 3  |                      |                      |                                                                                                                                                                                                                                                                                                                                                                                |                               |
| 4  |                      |                      |                                                                                                                                                                                                                                                                                                                                                                                |                               |
| 5  |                      |                      |                                                                                                                                                                                                                                                                                                                                                                                |                               |
| 6  | Interventions:       | <a href="#">#11a</a> | Interventions for each group with sufficient detail to allow replication, including how and when they will be administered                                                                                                                                                                                                                                                     | n/a, no interventions planned |
| 7  | description          |                      |                                                                                                                                                                                                                                                                                                                                                                                |                               |
| 8  |                      |                      |                                                                                                                                                                                                                                                                                                                                                                                |                               |
| 9  |                      |                      |                                                                                                                                                                                                                                                                                                                                                                                |                               |
| 10 |                      |                      |                                                                                                                                                                                                                                                                                                                                                                                |                               |
| 11 | Interventions:       | <a href="#">#11b</a> | Criteria for discontinuing or modifying allocated interventions for a given trial participant (eg, drug dose change in response to harms, participant request, or improving / worsening disease)                                                                                                                                                                               | n/a                           |
| 12 | modifications        |                      |                                                                                                                                                                                                                                                                                                                                                                                |                               |
| 13 |                      |                      |                                                                                                                                                                                                                                                                                                                                                                                |                               |
| 14 |                      |                      |                                                                                                                                                                                                                                                                                                                                                                                |                               |
| 15 |                      |                      |                                                                                                                                                                                                                                                                                                                                                                                |                               |
| 16 |                      |                      |                                                                                                                                                                                                                                                                                                                                                                                |                               |
| 17 |                      |                      |                                                                                                                                                                                                                                                                                                                                                                                |                               |
| 18 | Interventions:       | <a href="#">#11c</a> | Strategies to improve adherence to intervention protocols, and any procedures for monitoring adherence (eg, drug tablet return; laboratory tests)                                                                                                                                                                                                                              | n/a                           |
| 19 | adherence            |                      |                                                                                                                                                                                                                                                                                                                                                                                |                               |
| 20 |                      |                      |                                                                                                                                                                                                                                                                                                                                                                                |                               |
| 21 |                      |                      |                                                                                                                                                                                                                                                                                                                                                                                |                               |
| 22 |                      |                      |                                                                                                                                                                                                                                                                                                                                                                                |                               |
| 23 |                      |                      |                                                                                                                                                                                                                                                                                                                                                                                |                               |
| 24 | Interventions:       | <a href="#">#11d</a> | Relevant concomitant care and interventions that are permitted or prohibited during the trial                                                                                                                                                                                                                                                                                  | n/a                           |
| 25 | concomitant care     |                      |                                                                                                                                                                                                                                                                                                                                                                                |                               |
| 26 |                      |                      |                                                                                                                                                                                                                                                                                                                                                                                |                               |
| 27 |                      |                      |                                                                                                                                                                                                                                                                                                                                                                                |                               |
| 28 | Outcomes             | <a href="#">#12</a>  | Primary, secondary, and other outcomes, including the specific measurement variable (eg, systolic blood pressure), analysis metric (eg, change from baseline, final value, time to event), method of aggregation (eg, median, proportion), and time point for each outcome. Explanation of the clinical relevance of chosen efficacy and harm outcomes is strongly recommended | 9-10                          |
| 29 |                      |                      |                                                                                                                                                                                                                                                                                                                                                                                |                               |
| 30 |                      |                      |                                                                                                                                                                                                                                                                                                                                                                                |                               |
| 31 |                      |                      |                                                                                                                                                                                                                                                                                                                                                                                |                               |
| 32 |                      |                      |                                                                                                                                                                                                                                                                                                                                                                                |                               |
| 33 |                      |                      |                                                                                                                                                                                                                                                                                                                                                                                |                               |
| 34 |                      |                      |                                                                                                                                                                                                                                                                                                                                                                                |                               |
| 35 |                      |                      |                                                                                                                                                                                                                                                                                                                                                                                |                               |
| 36 |                      |                      |                                                                                                                                                                                                                                                                                                                                                                                |                               |
| 37 |                      |                      |                                                                                                                                                                                                                                                                                                                                                                                |                               |
| 38 |                      |                      |                                                                                                                                                                                                                                                                                                                                                                                |                               |
| 39 | Participant timeline | <a href="#">#13</a>  | Time schedule of enrolment, interventions (including any run-ins and washouts), assessments, and visits for participants. A schematic diagram is highly recommended (see Figure)                                                                                                                                                                                               | 6-8                           |
| 40 |                      |                      |                                                                                                                                                                                                                                                                                                                                                                                |                               |
| 41 |                      |                      |                                                                                                                                                                                                                                                                                                                                                                                |                               |
| 42 |                      |                      |                                                                                                                                                                                                                                                                                                                                                                                |                               |
| 43 |                      |                      |                                                                                                                                                                                                                                                                                                                                                                                |                               |
| 44 | Sample size          | <a href="#">#14</a>  | Estimated number of participants needed to achieve study objectives and how it was determined, including clinical and statistical assumptions supporting any sample size calculations                                                                                                                                                                                          | 11-12                         |
| 45 |                      |                      |                                                                                                                                                                                                                                                                                                                                                                                |                               |
| 46 |                      |                      |                                                                                                                                                                                                                                                                                                                                                                                |                               |
| 47 |                      |                      |                                                                                                                                                                                                                                                                                                                                                                                |                               |
| 48 |                      |                      |                                                                                                                                                                                                                                                                                                                                                                                |                               |
| 49 |                      |                      |                                                                                                                                                                                                                                                                                                                                                                                |                               |
| 50 |                      |                      |                                                                                                                                                                                                                                                                                                                                                                                |                               |
| 51 | Recruitment          | <a href="#">#15</a>  | Strategies for achieving adequate participant enrolment to reach target sample size                                                                                                                                                                                                                                                                                            | 11-12                         |
| 52 |                      |                      |                                                                                                                                                                                                                                                                                                                                                                                |                               |
| 53 |                      |                      |                                                                                                                                                                                                                                                                                                                                                                                |                               |
| 54 |                      |                      |                                                                                                                                                                                                                                                                                                                                                                                |                               |

## Methods:

### Assignment of interventions (for

**controlled trials)**

|    |                        |                                                                                                                                            |       |
|----|------------------------|--------------------------------------------------------------------------------------------------------------------------------------------|-------|
| 1  |                        |                                                                                                                                            |       |
| 2  |                        |                                                                                                                                            |       |
| 3  | Allocation: sequence   | <a href="#">#16a</a>                                                                                                                       | n/a   |
| 4  | generation             | Method of generating the allocation sequence (eg, computer-                                                                                |       |
| 5  |                        | generated random numbers), and list of any factors for                                                                                     |       |
| 6  |                        | stratification. To reduce predictability of a random sequence,                                                                             |       |
| 7  |                        | details of any planned restriction (eg, blocking) should be                                                                                |       |
| 8  |                        | provided in a separate document that is unavailable to those                                                                               |       |
| 9  |                        | who enrol participants or assign interventions                                                                                             |       |
| 10 |                        |                                                                                                                                            |       |
| 11 |                        |                                                                                                                                            |       |
| 12 | Allocation             | <a href="#">#16b</a>                                                                                                                       | n/a   |
| 13 | concealment            | Mechanism of implementing the allocation sequence (eg,                                                                                     |       |
| 14 | mechanism              | central telephone; sequentially numbered, opaque, sealed                                                                                   |       |
| 15 |                        | envelopes), describing any steps to conceal the sequence until                                                                             |       |
| 16 |                        | interventions are assigned                                                                                                                 |       |
| 17 |                        |                                                                                                                                            |       |
| 18 |                        |                                                                                                                                            |       |
| 19 | Allocation:            | <a href="#">#16c</a>                                                                                                                       | n/a   |
| 20 | implementation         | Who will generate the allocation sequence, who will enrol                                                                                  |       |
| 21 |                        | participants, and who will assign participants to interventions                                                                            |       |
| 22 |                        |                                                                                                                                            |       |
| 23 | Blinding (masking)     | <a href="#">#17a</a>                                                                                                                       | n/a   |
| 24 |                        | Who will be blinded after assignment to interventions (eg,                                                                                 |       |
| 25 |                        | trial participants, care providers, outcome assessors, data                                                                                |       |
| 26 |                        | analysts), and how                                                                                                                         |       |
| 27 |                        |                                                                                                                                            |       |
| 28 | Blinding (masking):    | <a href="#">#17b</a>                                                                                                                       | n/a   |
| 29 | emergency unblinding   | If blinded, circumstances under which unblinding is                                                                                        |       |
| 30 |                        | permissible, and procedure for revealing a participant's                                                                                   |       |
| 31 |                        | allocated intervention during the trial                                                                                                    |       |
| 32 |                        |                                                                                                                                            |       |
| 33 |                        |                                                                                                                                            |       |
| 34 | <b>Methods: Data</b>   |                                                                                                                                            |       |
| 35 | <b>collection,</b>     |                                                                                                                                            |       |
| 36 | <b>management, and</b> |                                                                                                                                            |       |
| 37 | <b>analysis</b>        |                                                                                                                                            |       |
| 38 |                        |                                                                                                                                            |       |
| 39 |                        |                                                                                                                                            |       |
| 40 | Data collection plan   | <a href="#">#18a</a>                                                                                                                       | 10-11 |
| 41 |                        | Plans for assessment and collection of outcome, baseline, and                                                                              |       |
| 42 |                        | other trial data, including any related processes to promote                                                                               |       |
| 43 |                        | data quality (eg, duplicate measurements, training of                                                                                      |       |
| 44 |                        | assessors) and a description of study instruments (eg,                                                                                     |       |
| 45 |                        | questionnaires, laboratory tests) along with their reliability                                                                             |       |
| 46 |                        | and validity, if known. Reference to where data collection                                                                                 |       |
| 47 |                        | forms can be found, if not in the protocol                                                                                                 |       |
| 48 |                        |                                                                                                                                            |       |
| 49 |                        |                                                                                                                                            |       |
| 50 |                        |                                                                                                                                            |       |
| 51 | Data collection plan:  | <a href="#">#18b</a>                                                                                                                       | 10-11 |
| 52 | retention              | Plans to promote participant retention and complete follow-                                                                                |       |
| 53 |                        | up, including list of any outcome data to be collected for                                                                                 |       |
| 54 |                        | participants who discontinue or deviate from intervention                                                                                  |       |
| 55 |                        | protocols                                                                                                                                  |       |
| 56 |                        |                                                                                                                                            |       |
| 57 |                        |                                                                                                                                            |       |
| 58 | Data management        | <a href="#">#19</a>                                                                                                                        | 10-11 |
| 59 |                        | Plans for data entry, coding, security, and storage, including                                                                             |       |
| 60 |                        | For peer review only - <a href="http://bmjopen.bmj.com/site/about/guidelines.xhtml">http://bmjopen.bmj.com/site/about/guidelines.xhtml</a> |       |

any related processes to promote data quality (eg, double data entry; range checks for data values). Reference to where details of data management procedures can be found, if not in the protocol

|    |                            |                                                                 |       |
|----|----------------------------|-----------------------------------------------------------------|-------|
| 1  |                            |                                                                 |       |
| 2  |                            |                                                                 |       |
| 3  |                            |                                                                 |       |
| 4  |                            |                                                                 |       |
| 5  |                            |                                                                 |       |
| 6  |                            |                                                                 |       |
| 7  | Statistics: outcomes       | <a href="#">#20a</a>                                            | 11-12 |
| 8  |                            | Statistical methods for analysing primary and secondary         |       |
| 9  |                            | outcomes. Reference to where other details of the statistical   |       |
| 10 |                            | analysis plan can be found, if not in the protocol              |       |
| 11 |                            |                                                                 |       |
| 12 | Statistics: additional     | <a href="#">#20b</a>                                            | 11-12 |
| 13 | analyses                   | Methods for any additional analyses (eg, subgroup and           |       |
| 14 |                            | adjusted analyses)                                              |       |
| 15 |                            |                                                                 |       |
| 16 | Statistics: analysis       | <a href="#">#20c</a>                                            | 11-12 |
| 17 | population and             | Definition of analysis population relating to protocol non-     |       |
| 18 | missing data               | adherence (eg, as randomised analysis), and any statistical     |       |
| 19 |                            | methods to handle missing data (eg, multiple imputation)        |       |
| 20 |                            |                                                                 |       |
| 21 | <b>Methods: Monitoring</b> |                                                                 |       |
| 22 |                            |                                                                 |       |
| 23 |                            |                                                                 |       |
| 24 | Data monitoring:           | <a href="#">#21a</a>                                            | n/a   |
| 25 | formal committee           | Composition of data monitoring committee (DMC); summary         |       |
| 26 |                            | of its role and reporting structure; statement of whether it is |       |
| 27 |                            | independent from the sponsor and competing interests; and       |       |
| 28 |                            | reference to where further details about its charter can be     |       |
| 29 |                            | found, if not in the protocol. Alternatively, an explanation of |       |
| 30 |                            | why a DMC is not needed                                         |       |
| 31 |                            |                                                                 |       |
| 32 |                            |                                                                 |       |
| 33 |                            |                                                                 |       |
| 34 | Data monitoring:           | <a href="#">#21b</a>                                            | 11-12 |
| 35 | interim analysis           | Description of any interim analyses and stopping guidelines,    |       |
| 36 |                            | including who will have access to these interim results and     |       |
| 37 |                            | make the final decision to terminate the trial                  |       |
| 38 |                            |                                                                 |       |
| 39 | Harms                      | <a href="#">#22</a>                                             | 10    |
| 40 |                            | Plans for collecting, assessing, reporting, and managing        |       |
| 41 |                            | solicited and spontaneously reported adverse events and other   |       |
| 42 |                            | unintended effects of trial interventions or trial conduct      |       |
| 43 |                            |                                                                 |       |
| 44 | Auditing                   | <a href="#">#23</a>                                             | n/a   |
| 45 |                            | Frequency and procedures for auditing trial conduct, if any,    |       |
| 46 |                            | and whether the process will be independent from                |       |
| 47 |                            | investigators and the sponsor                                   |       |
| 48 |                            |                                                                 |       |
| 49 | <b>Ethics and</b>          |                                                                 |       |
| 50 | <b>dissemination</b>       |                                                                 |       |
| 51 |                            |                                                                 |       |
| 52 |                            |                                                                 |       |
| 53 | Research ethics            | <a href="#">#24</a>                                             | 2,12  |
| 54 | approval                   | Plans for seeking research ethics committee / institutional     |       |
| 55 |                            | review board (REC / IRB) approval                               |       |
| 56 |                            |                                                                 |       |
| 57 | Protocol amendments        | <a href="#">#25</a>                                             | 2     |
| 58 |                            | Plans for communicating important protocol modifications        |       |
| 59 |                            | (eg, changes to eligibility criteria, outcomes, analyses) to    |       |

|    |                                             |                                                                                                                                                                                                                                                                                                          |       |
|----|---------------------------------------------|----------------------------------------------------------------------------------------------------------------------------------------------------------------------------------------------------------------------------------------------------------------------------------------------------------|-------|
|    |                                             | relevant parties (eg, investigators, REC / IRBs, trial participants, trial registries, journals, regulators)                                                                                                                                                                                             |       |
| 1  |                                             |                                                                                                                                                                                                                                                                                                          |       |
| 2  |                                             |                                                                                                                                                                                                                                                                                                          |       |
| 3  |                                             |                                                                                                                                                                                                                                                                                                          |       |
| 4  | Consent or assent                           | <a href="#">#26a</a> Who will obtain informed consent or assent from potential trial participants or authorised surrogates, and how (see Item 32)                                                                                                                                                        | 6,12  |
| 5  |                                             |                                                                                                                                                                                                                                                                                                          |       |
| 6  |                                             |                                                                                                                                                                                                                                                                                                          |       |
| 7  |                                             |                                                                                                                                                                                                                                                                                                          |       |
| 8  |                                             |                                                                                                                                                                                                                                                                                                          |       |
| 9  | Consent or assent: ancillary studies        | <a href="#">#26b</a> Additional consent provisions for collection and use of participant data and biological specimens in ancillary studies, if applicable                                                                                                                                               | n/a   |
| 10 |                                             |                                                                                                                                                                                                                                                                                                          |       |
| 11 |                                             |                                                                                                                                                                                                                                                                                                          |       |
| 12 |                                             |                                                                                                                                                                                                                                                                                                          |       |
| 13 |                                             |                                                                                                                                                                                                                                                                                                          |       |
| 14 | Confidentiality                             | <a href="#">#27</a> How personal information about potential and enrolled participants will be collected, shared, and maintained in order to protect confidentiality before, during, and after the trial                                                                                                 | 10-11 |
| 15 |                                             |                                                                                                                                                                                                                                                                                                          |       |
| 16 |                                             |                                                                                                                                                                                                                                                                                                          |       |
| 17 |                                             |                                                                                                                                                                                                                                                                                                          |       |
| 18 |                                             |                                                                                                                                                                                                                                                                                                          |       |
| 19 |                                             |                                                                                                                                                                                                                                                                                                          |       |
| 20 | Declaration of interests                    | <a href="#">#28</a> Financial and other competing interests for principal investigators for the overall trial and each study site                                                                                                                                                                        | 15    |
| 21 |                                             |                                                                                                                                                                                                                                                                                                          |       |
| 22 |                                             |                                                                                                                                                                                                                                                                                                          |       |
| 23 |                                             |                                                                                                                                                                                                                                                                                                          |       |
| 24 | Data access                                 | <a href="#">#29</a> Statement of who will have access to the final trial dataset, and disclosure of contractual agreements that limit such access for investigators                                                                                                                                      | 15-16 |
| 25 |                                             |                                                                                                                                                                                                                                                                                                          |       |
| 26 |                                             |                                                                                                                                                                                                                                                                                                          |       |
| 27 |                                             |                                                                                                                                                                                                                                                                                                          |       |
| 28 |                                             |                                                                                                                                                                                                                                                                                                          |       |
| 29 | Ancillary and post trial care               | <a href="#">#30</a> Provisions, if any, for ancillary and post-trial care, and for compensation to those who suffer harm from trial participation                                                                                                                                                        | 15-16 |
| 30 |                                             |                                                                                                                                                                                                                                                                                                          |       |
| 31 |                                             |                                                                                                                                                                                                                                                                                                          |       |
| 32 |                                             |                                                                                                                                                                                                                                                                                                          |       |
| 33 |                                             |                                                                                                                                                                                                                                                                                                          |       |
| 34 | Dissemination policy: trial results         | <a href="#">#31a</a> Plans for investigators and sponsor to communicate trial results to participants, healthcare professionals, the public, and other relevant groups (eg, via publication, reporting in results databases, or other data sharing arrangements), including any publication restrictions | 11,16 |
| 35 |                                             |                                                                                                                                                                                                                                                                                                          |       |
| 36 |                                             |                                                                                                                                                                                                                                                                                                          |       |
| 37 |                                             |                                                                                                                                                                                                                                                                                                          |       |
| 38 |                                             |                                                                                                                                                                                                                                                                                                          |       |
| 39 |                                             |                                                                                                                                                                                                                                                                                                          |       |
| 40 |                                             |                                                                                                                                                                                                                                                                                                          |       |
| 41 |                                             |                                                                                                                                                                                                                                                                                                          |       |
| 42 |                                             |                                                                                                                                                                                                                                                                                                          |       |
| 43 | Dissemination policy: authorship            | <a href="#">#31b</a> Authorship eligibility guidelines and any intended use of professional writers                                                                                                                                                                                                      | n/a   |
| 44 |                                             |                                                                                                                                                                                                                                                                                                          |       |
| 45 |                                             |                                                                                                                                                                                                                                                                                                          |       |
| 46 |                                             |                                                                                                                                                                                                                                                                                                          |       |
| 47 | Dissemination policy: reproducible research | <a href="#">#31c</a> Plans, if any, for granting public access to the full protocol, participant-level dataset, and statistical code                                                                                                                                                                     | n/a   |
| 48 |                                             |                                                                                                                                                                                                                                                                                                          |       |
| 49 |                                             |                                                                                                                                                                                                                                                                                                          |       |
| 50 | <b>Appendices</b>                           |                                                                                                                                                                                                                                                                                                          |       |
| 51 |                                             |                                                                                                                                                                                                                                                                                                          |       |
| 52 |                                             |                                                                                                                                                                                                                                                                                                          |       |
| 53 | Informed consent materials                  | <a href="#">#32</a> Model consent form and other related documentation given to participants and authorised surrogates                                                                                                                                                                                   | 6,12  |
| 54 |                                             |                                                                                                                                                                                                                                                                                                          |       |
| 55 |                                             |                                                                                                                                                                                                                                                                                                          |       |
| 56 |                                             |                                                                                                                                                                                                                                                                                                          |       |
| 57 | Biological specimens                        | <a href="#">#33</a> Plans for collection, laboratory evaluation, and storage of biological specimens for genetic or molecular analysis in the                                                                                                                                                            | n/a   |
| 58 |                                             |                                                                                                                                                                                                                                                                                                          |       |
| 59 |                                             |                                                                                                                                                                                                                                                                                                          |       |
| 60 |                                             |                                                                                                                                                                                                                                                                                                          |       |

1 current trial and for future use in ancillary studies, if  
2 applicable  
3

4 Notes:  
5

- 6 • 3: 24/03/2020, version 2.0  
7
- 8 • 5c: n/a, no sponsors or funders  
9
- 10 • 11a: n/a, no interventions planned The SPIRIT checklist is distributed under the terms of the Creative  
11 Commons Attribution License CC-BY-ND 3.0. This checklist was completed on 06. June 2020 using  
12 <https://www.goodreports.org/>, a tool made by the [EQUATOR Network](#) in collaboration with [Penelope.ai](#)  
13  
14  
15  
16  
17  
18  
19  
20  
21  
22  
23  
24  
25  
26  
27  
28  
29  
30  
31  
32  
33  
34  
35  
36  
37  
38  
39  
40  
41  
42  
43  
44  
45  
46  
47  
48  
49  
50  
51  
52  
53  
54  
55  
56  
57  
58  
59  
60

# BMJ Open

**Study protocol for a prospective, double-blinded, observational study investigating the diagnostic accuracy of an app-based diagnostic health care application in an emergency room setting: the eRadaR-trial**

|                                 |                                                                                                                                                                                                                                                                                                                                                                                                                                                                                                                                                                                                                                                                                                                                                                                                                                                                                                                                                                                          |
|---------------------------------|------------------------------------------------------------------------------------------------------------------------------------------------------------------------------------------------------------------------------------------------------------------------------------------------------------------------------------------------------------------------------------------------------------------------------------------------------------------------------------------------------------------------------------------------------------------------------------------------------------------------------------------------------------------------------------------------------------------------------------------------------------------------------------------------------------------------------------------------------------------------------------------------------------------------------------------------------------------------------------------|
| Journal:                        | <i>BMJ Open</i>                                                                                                                                                                                                                                                                                                                                                                                                                                                                                                                                                                                                                                                                                                                                                                                                                                                                                                                                                                          |
| Manuscript ID                   | bmjopen-2020-041396.R1                                                                                                                                                                                                                                                                                                                                                                                                                                                                                                                                                                                                                                                                                                                                                                                                                                                                                                                                                                   |
| Article Type:                   | Protocol                                                                                                                                                                                                                                                                                                                                                                                                                                                                                                                                                                                                                                                                                                                                                                                                                                                                                                                                                                                 |
| Date Submitted by the Author:   | 04-Nov-2020                                                                                                                                                                                                                                                                                                                                                                                                                                                                                                                                                                                                                                                                                                                                                                                                                                                                                                                                                                              |
| Complete List of Authors:       | Faqar-Uz-Zaman, S. Fatima; Hospital of the Goethe University Frankfurt Surgery Centre, Department for General, Visceral and Transplant Surgery<br>Filmann, Natalie; Institute of Biostatistics and Mathematical Modeling, Goethe-University, Frankfurt/Main,<br>Mahkovic, Dora; Ljubljana Central Medical School<br>von Wagner, Michael; Goethe University Frankfurt<br>Detemble, Charlotte ; Hospital of the Goethe University Frankfurt Surgery Centre<br>Kippke, Ulf; Hospital of the Goethe University Frankfurt Surgery Centre<br>Marschall, Ursula; BARMER<br>Anantharajah, Luxia ; Hospital of the Goethe University Frankfurt Surgery Centre<br>Baumartz, Philipp; Hospital of the Goethe University Frankfurt Surgery Centre<br>Sobotta, Paula ; Hospital of the Goethe University Frankfurt Surgery Centre<br>Bechstein, Wolf; Hospital of the Goethe University Frankfurt Surgery Centre<br>Schnitzbauer, Andreas; Hospital of the Goethe University Frankfurt Surgery Centre |
| <b>Primary Subject Heading</b>: | Surgery                                                                                                                                                                                                                                                                                                                                                                                                                                                                                                                                                                                                                                                                                                                                                                                                                                                                                                                                                                                  |
| Secondary Subject Heading:      | Emergency medicine, Gastroenterology and hepatology, Diagnostics                                                                                                                                                                                                                                                                                                                                                                                                                                                                                                                                                                                                                                                                                                                                                                                                                                                                                                                         |
| Keywords:                       | ACCIDENT & EMERGENCY MEDICINE, Adult gastroenterology < GASTROENTEROLOGY, Adult surgery < SURGERY                                                                                                                                                                                                                                                                                                                                                                                                                                                                                                                                                                                                                                                                                                                                                                                                                                                                                        |
|                                 |                                                                                                                                                                                                                                                                                                                                                                                                                                                                                                                                                                                                                                                                                                                                                                                                                                                                                                                                                                                          |

SCHOLARONE™  
Manuscripts





I, the Submitting Author has the right to grant and does grant on behalf of all authors of the Work (as defined in the below author licence), an exclusive licence and/or a non-exclusive licence for contributions from authors who are: i) UK Crown employees; ii) where BMJ has agreed a CC-BY licence shall apply, and/or iii) in accordance with the terms applicable for US Federal Government officers or employees acting as part of their official duties; on a worldwide, perpetual, irrevocable, royalty-free basis to BMJ Publishing Group Ltd ("BMJ") its licensees and where the relevant Journal is co-owned by BMJ to the co-owners of the Journal, to publish the Work in this journal and any other BMJ products and to exploit all rights, as set out in our [licence](#).

The Submitting Author accepts and understands that any supply made under these terms is made by BMJ to the Submitting Author unless you are acting as an employee on behalf of your employer or a postgraduate student of an affiliated institution which is paying any applicable article publishing charge ("APC") for Open Access articles. Where the Submitting Author wishes to make the Work available on an Open Access basis (and intends to pay the relevant APC), the terms of reuse of such Open Access shall be governed by a Creative Commons licence – details of these licences and which [Creative Commons](#) licence will apply to this Work are set out in our licence referred to above.

Other than as permitted in any relevant BMJ Author's Self Archiving Policies, I confirm this Work has not been accepted for publication elsewhere, is not being considered for publication elsewhere and does not duplicate material already published. I confirm all authors consent to publication of this Work and authorise the granting of this licence.

1  
2  
3  
4 **Study protocol for a prospective, double-blinded, observational study**  
5 **investigating the diagnostic accuracy of an app-based diagnostic health care**  
6 **application in an emergency room setting: the eRadaR-trial**  
7  
8  
9

10  
11 S. Fatima Faqar-Uz-Zaman<sup>1</sup>, Natalie Filmann<sup>2</sup>, Dora Mahkovic<sup>3</sup>, Michael von  
12 Wagner<sup>4</sup>, Charlotte Detemble<sup>1</sup>, Ulf Kippke<sup>1</sup>, Ursula Marschall<sup>5</sup>, Luxia Anantharajah<sup>1</sup>,  
13 Philipp Baumartz<sup>1</sup>, Paula Sobotta<sup>1</sup>, Wolf O. Bechstein<sup>1</sup> and Andreas A. Schnitzbauer<sup>1</sup>  
14  
15  
16  
17

18  
19  
20 <sup>1</sup> Department for General, Visceral and Transplant Surgery, Frankfurt University  
21 Hospital, Theodor-Stern-Kai 7, 60590 Frankfurt, Germany  
22

23  
24 <sup>2</sup> Institute of Biostatistics and Mathematical Modeling, Goethe-University Frankfurt,  
25 Germany  
26

27  
28 <sup>3</sup> MCL Medical Center Ljubljana, Ljubljana, Slovenia  
29

30  
31 <sup>4</sup> Executive Department for Medical IT-Systems and Digitalization, Frankfurt  
32 University Hospital, Germany  
33

34  
35 <sup>5</sup> Barmer health insurance, Germany  
36  
37  
38  
39  
40

41 Corresponding author:  
42

43 Dr. S. Fatima Faqar-Uz-Zaman  
44

45 Department for General, Visceral and Transplant Surgery  
46

47 Frankfurt University Hospital, Goethe-University Frankfurt/Main  
48

49 Theodor-Stern-Kai 7  
50

51 60590 Frankfurt am Main  
52

53 Phone: +49-69-6301-5253  
54

55 Fax: +49-69-6301-84028  
56

57 Email: [sarafatima.faqar-uz-zaman@kgu.de](mailto:sarafatima.faqar-uz-zaman@kgu.de)  
58  
59  
60

## Abstract

**Introduction:** Occurrence of inaccurate or delayed diagnoses is a significant concern in patient care, particularly in emergency medicine, where decision-making is often constrained by high throughput and inaccurate admission diagnoses. Artificial intelligence (AI)-based diagnostic decision support system (DDSS) have been developed to enhance clinical performance by suggesting differential diagnoses to a given case, based on an integrated medical knowledge base and machine learning techniques. The purpose of the study is to evaluate the diagnostic accuracy of Ada<sup>®</sup>, an app-based diagnostic tool, and the impact on patient outcome.

**Methods and analysis:** The eRadaR trial is a prospective, double-blinded study with patients presenting to the emergency room (ER) with abdominal pain. At initial contact in the ER, a structured interview will be performed using the Ada-App<sup>®</sup> and both, patients and attending physicians, will be blinded to the proposed diagnosis lists until trial completion. Throughout the study, clinical data relating to diagnostic findings and types of therapy will be obtained and the follow-up until day 90 will comprise occurrence of complications and overall survival of patients. The primary efficacy of the trial is defined by the percentage of correct diagnoses suggested by Ada<sup>®</sup> compared to the final discharge diagnosis. Further, accuracy and timing of diagnosis will be compared to decision-making of classical doctor-patient interaction. Secondary objectives are complications, length of hospital stay, and overall survival.

**Ethics and dissemination:** Ethical approval was received by the independent ethics committee (IEC) of the Goethe-University Frankfurt on 9<sup>th</sup> April 2020 including the patient information material and informed consent form. All protocol amendments must be reported to and adapted by the IEC. The results from this study will be submitted to peer-reviewed journals and reported at suitable national and international meetings.

**Trial registration:** German Clinical Trials Register: DRKS00019098 (registered on 29<sup>th</sup> May 2020).

**Keywords:** Artificial intelligence, diagnostic accuracy, emergency room diagnoses, abdominal pain

## Article Summary

### Strengths and weaknesses of this study

- This is the first prospective study to examine the diagnostic accuracy of an app-based diagnostic tool in an emergency room (ED) and the impact on clinical outcomes.
- The study will be conducted in a real-life setting to investigate the performance in a high stress environment and to provide rationale for routine clinical application.
- The double-blinded design will avoid bias regarding research findings.
- The primary limitation of an observational design is that only associations can be described, not causal relationships.

## Introduction

Diagnostic errors, comprising inaccurate, delayed, or missed diagnoses, are one of the major challenges in public healthcare [1]. In the recent 'Patient Safety Fact File', the World Health Organization (WHO) outlines ten crucial facts about patient safety [2]. Accordingly, adverse events are among the ten leading causes of death and disability, contributing to approximately 10% of patients harmed during hospitalization. Of note, 10% to 20% of adverse events have been quoted to be particularly related to diagnostic failure, causing more harm to patients than medication or treatment errors [3–5]. Further, false or delayed diagnoses are reported to be the most common reason for medical malpractice litigation [6]. Graber *et al.* estimated that diagnostic failures occurred in 5%-15% of cases, depending on the medical specialty with higher percentages assumed in primary care and emergency medicine [7]. Various reasons have been identified to contribute to false diagnoses. Graber concluded that cognitive slips, primarily resulting from faulty information processing and verification, and misguided situational confidence occur most frequently [8, 9].

This is especially evident in ER settings, which often have to deal with high throughputs, fast decision-making, and incomplete clinical information in a disruptive environment. In particular, ER overcrowding has been identified as a serious threat to patient safety, resulting in poor clinical outcome and a significant increase in mortality [10].

Previous studies have revealed that more than 40% of admission diagnoses at first presentation to the ER are not concordant with the final diagnosis of the patient [11–13]. That means, that throughout the hospital stay, the patient experiences a change in diagnosis based on a variety of additional diagnostics and reevaluation of initial assumptions, finally leading to the correct diagnosis. In particular, approximately 30% of patients with abdominal pain, being one of the leading causes for visiting the ER, exhibit a discrepancy in diagnosis [14, 15]. In particular, misdiagnosis rate of acute appendicitis, the most frequent reason for acute abdominal pain, has largely remained unchanged over time and is still associated with a high ratio of negative appendectomies [16]. Inaccurate diagnosing in ERs has been shown to be further associated with increased length of hospital stay, rate of consultations, healthcare cost, and risk for mortality and morbidity, contributing to a serious concern to patient safety [11, 13, 17, 18]. Thus, a high degree of diagnostic accuracy can lead to an

1  
2  
3 improvement in quality of patient care. Correct admission diagnoses are crucial for a  
4 reliable triage and process management and critically influence the initial evaluation in  
5 that ER and subsequent clinical course of the patient [19].  
6  
7

8  
9 Digital technologies and artificial intelligence (AI)-based methods have recently  
10 emerged as impressively powerful tools to empower physicians in clinical decision  
11 making and improve healthcare quality. More specifically, diagnostic decision support  
12 systems (DDSS) have demonstrated to facilitate assessment of clinical data input by  
13 using an extensive medical knowledge base [20, 21]. One version of DDSS is Ada®,  
14 an app-based AI-machine learning system that incorporates patients' symptoms and  
15 other findings into its knowledge base and intelligent technology to deliver effective  
16 healthcare [22, 23]. Based on an algorithmic pathway and driven by chief complaints,  
17 the app-based system generates a set of differential diagnoses for a given clinical  
18 case. Several studies have reported that DDSS have the potential to increase  
19 diagnostic performance, obtaining an accuracy rate of 70-96% [24, 25]. In particular, a  
20 retrospective study of rare diseases has demonstrated that Ada suggests accurate  
21 diagnoses earlier than clinical diagnoses in more than half of all cases [23].  
22  
23

24  
25 However, application of the Ada app has not been investigated in a real-life setting,  
26 particularly in ERs, which has to deal with a high stress environment and heavy time  
27 constraints. This app-based method may be a valuable companion in triaging patients  
28 and support clinicians in making decisions more accurate and sooner by  
29 simultaneously reducing risk for medical errors. Therefore, in the present study, we  
30 aim to evaluate the diagnostic ability of Ada in ER settings and examine the impact on  
31 timing of diagnosis.  
32  
33  
34  
35  
36  
37  
38  
39  
40  
41  
42  
43  
44  
45  
46  
47  
48  
49  
50  
51  
52  
53  
54  
55  
56  
57  
58  
59  
60

## Methods and analysis

The eRadaR-trial is designed as a prospective, double-blinded, observational study evaluating the diagnostic accuracy of the Ada-App® in the ER of the Department of General, Visceral and Transplant Surgery of the Frankfurt University Hospital, Germany. This trial is registered as DRKS00019098 in the German Clinical Trials Register and the trial protocol is written in accordance with the current Standard Protocol Items: Recommendations for Interventional Trials (SPIRIT 2013). The SPIRIT checklist is given in Additional file 1.

### Study population and eligibility criteria

All patients presenting to the ER with abdominal pain will form the study population and be screened for trial eligibility. Patients, who will be immediately discharged from the ED on the same day and patients, who will be admitted to the hospital after presenting to the ER will be both included in the study and followed up. Inclusion criteria comprise: (a.) adults aged  $\geq 18$  years, (b.) patients presenting with abdominal pain to the ER, and (c.) patients willing to participate and able to provide written informed consent. The criteria of exclusion are: (a.) intubated patients, (b.) unstable patients or (c.) patients with severe injuries requiring immediate medical treatment, (d.) patients unwilling or incapable of providing informed consent. Eligible patients are asked for their participation in the trial and written informed consent will be obtained from themselves. All reasons for exclusion of patients will be recorded in the trial screening log and analyzed accordingly.

### Description of study visits and assessment schedule

Eligible patients will be interviewed by the study team with the Ada-App® based on an algorithmic pathway of questions relating to the symptoms. The Ada-App® will only obtain data about patient demographics, patient history, and information about current complaints. Patient's name and date of birth will be pseudonymized using an individual identification code, as described in the section 'data management and data safety'. Throughout the study, the patient, the study team, and the physician treating the patient will be blinded regarding the list of proposed diagnoses by the app. The patient will subsequently be diagnosed by classical doctor-patient interaction and decision-making. The clinical course of the patient will be followed until day 90 after initial contact in the ER. Detailed information about outline of the study and assessment schedule are displayed in Table1 and Figure1.

**Table 1** Schedule of study visits and assessments of the eRadaR study

|                               | Baseline      | Hospital stay*          | Discharge | 90-days FU     |
|-------------------------------|---------------|-------------------------|-----------|----------------|
| Visits                        | V1<br>(Day 0) | V2 and 3<br>(Day 7, 14) | V4        | V5<br>(Day 90) |
| Informed consent              | X             |                         |           |                |
| Eligibility criteria          | X             |                         |           |                |
| Demographic data:             | X             |                         |           | X              |
| a) Charlson Comorbidity Index | X             |                         |           |                |
| b) RAI-C score                |               |                         |           |                |
| Ada diagnosis list            | X             |                         |           |                |
| ICD-10 diagnoses              | X             |                         | X         | X              |
| Symptoms                      | X             |                         |           |                |
| Diagnostics**                 |               | X                       | X         |                |
| Therapy and OPS-code          |               | X                       | X         |                |
| Rate of consultations         |               |                         | X         |                |
| Complications (CCI)           |               | X                       | X         | X              |
| Length of hospital stay       |               |                         | X         |                |
| Overall survival              |               |                         |           | X              |

\* Visit 2 or 3 are left out, if the patient is discharged before

\*\* Diagnostics include:

a) Routine blood samples (C-reactive protein, White blood cells, Hemoglobin, Platelets, Sodium, Potassium, Creatinine, Albumin, Bilirubin, INR)

b) Instrumental diagnostics (Ultrasound, Chest/Abdominal CT/MRI, ECG, Endoscopy)

RAI-C = Risk Analysis C score; ICD = International Classification of Diseases; OPS = Operations and Procedures;

CCI = Comprehensive Complication Index, FU = Follow-up, V = visit

### ***Patient presenting to the ED (Visit 1)***

After enrollment in the trial, a structured interview with the Ada-App® will be conducted and baseline data will be assessed including demographic data according to the Carlson Comorbidity Index and the Risk Analysis Index-C score (RAI-C score), the patients' symptoms and ICD-10 diagnoses list [26–28]. Participants are then diagnosed and treated according to the standard of care by the attending physician of the ER. As this is a double-blinded study to patients and treating physicians, Ada-App®



1  
2  
3 diagnoses lists will be randomly allocated to a study-ID and then manually transferred  
4 into the electronic case report forms (eCRF). The trial personnel will be blinded until  
5 the end of the study to avoid bias regarding subsequent diagnoses and treatment of  
6 the patient, except of the interim analysis, which is mentioned in the section of  
7 statistical analysis.  
8  
9

### 10 11 12 ***Hospital stay (Visit 2, day 7)*** 13

14 This visit is performed on day 7, after the patient is admitted to the hospital. Data about  
15 diagnostics and therapies are assessed comprising laboratory results (i.e. C-reactive  
16 protein, white blood cells, platelets, hemoglobin, bilirubin, creatinine, sodium and  
17 potassium, albumin, INR), computer-assisted diagnostics (i.e. ultrasound,  
18 chest/abdominal CT/MRI, ECG, endoscopy), type of therapy (conservative,  
19 interventional or surgery), OPS-code of therapies and complications according to the  
20 Comprehensive Complication Index (CCI) together with the date of occurrence [29]. If  
21 the patient has not been admitted to the hospital or is discharged before day 7, visit 2  
22 is left out.  
23  
24  
25  
26  
27  
28  
29

### 30 31 ***Hospital stay (Visit 3, day 14)*** 32

33 Visit 3 is performed on day 14 after patient's admission and assessment schedule is  
34 equivalent to visit 2. If the patient has not been admitted to the hospital or is discharged  
35 before day 14, visit 3 is left out.  
36  
37

### 38 39 ***Discharge (Visit 4)*** 40

41 At discharge, data including the final ICD-10 diagnosis and the timing of diagnosis will  
42 be recorded to subsequently analyze the accuracy and the timing of the Ada-App®  
43 compared to the classical doctor-patient-encounter. Further data items include  
44 diagnostics (laboratory, instrumental), OPS-codes and type of therapies, complications  
45 according to CCI, length of hospital stay, overall health cost, rate of consultation.  
46  
47  
48  
49

### 50 51 ***Follow-up (Visit 5)*** 52

53 The follow-up will be performed as a structured telephone interview or in person on  
54 day 90 and will encompass following data items: demographic data according to the  
55 RAI-C score, complication assessment according to CCI and overall survival.  
56  
57

### 58 59 **Interventions** 60

1  
2  
3 As this is an observational, double-blinded, prospective study, no experimental or  
4 control interventions are conducted.  
5  
6

## 7 **Endpoints**

### 8 ***Primary endpoint***

9  
10  
11 The primary endpoint of this study is to evaluate the diagnostic accuracy of the Ada-  
12 App® by comparing the decision-making of the classical doctor-patient interaction with  
13 the diagnoses proposed by the app-based algorithm.  
14  
15  
16

### 17 ***Secondary endpoint***

18  
19  
20 Secondary endpoints of this study consist of the following: timing of final discharge  
21 diagnosis and time to treatment during hospital stay, comparing accurate diagnoses  
22 with discharge diagnoses as descriptive assessments, the occurrence of complications  
23 according to the CCI, total length of stay in hospital from initial contact in the ER until  
24 discharge, patient morbidity and mortality at day 90, overall health cost analysis and  
25 consultation rate. Further endpoints are displayed in the description of assessment  
26 schedule (Table1).  
27  
28  
29  
30  
31

## 32 **Measurement methods**

33  
34 For data capture, following measurement methods will be used:  
35  
36

- 37 1. Primary outcome measurement will be performed using the Ada-App® which will  
38 deliver a set of differential diagnoses to a given clinical case [23]. Based on an  
39 algorithmic questionnaire and machine learning technologies, the Ada chatbot  
40 assesses symptoms of the patient, similar to the anamnestic techniques and clinical  
41 reasoning of physicians. Patients' data are integrated into an extensive knowledge  
42 base, which has been specifically designed by medical doctors by incorporating  
43 validated disease models and comprehensive medical literature. Then, differential  
44 diagnoses are generated and ranked in order considering two features: the  
45 probability, based on epidemiologic data, and the best match between the  
46 diagnosis and the given symptoms. Through AI-based methods and multiple  
47 feedback loops, the Ada® knowledge base grows after each interaction and  
48 diagnostic ability improves continuously.  
49
- 50 2. The occurrence of complications as secondary outcomes will be evaluated and  
51 analyzed according to the Comprehensive Complication Index (CCI) [29]. The CCI  
52 represents the standard assessment of postoperative morbidity and comprises all  
53  
54  
55  
56  
57  
58  
59  
60

1  
2  
3 complications occurring during a patient's course based on the Clavien-Dindo  
4 classification (CDC). Compared to the CDC, which ranks complications based on  
5 the severity of the therapeutic consequence and grades them in 5 levels, the CCI  
6 uses a formula to integrate all complications, ranging them from 0 ('no  
7 complication') to 100 ('death') [30]. This advanced approach enables comparison  
8 of patients harboring more than one complication and takes more subtle differences  
9 into consideration.

- 10  
11  
12  
13  
14  
15 3. For assessment of comorbid diseases and frailty-associated risk in a surgical  
16 population, we will use the Charlson Comorbidity Index and the RAI-C score.  
17  
18

### 19 **Risk-Benefit assessment**

20  
21 This is an observational, non-interventional study and does not comprise any specific  
22 risk for the patient, as data obtained with the app are not used in the ER standard of  
23 care. Therefore, there is no special need for additional safety management. A delay in  
24 the diagnosis and treatment of patients presenting to the ER is not expected, as the  
25 app-based interview will not require more than 10 minutes and will exclusively be  
26 performed in the waiting zone of the ER by the study team. Baseline assessment  
27 (during visit 1) will directly be conducted after patient has been registered at the ER  
28 and given informed consent. Besides that, unstable patients requiring immediate  
29 medical care are excluded from the study beforehand.  
30  
31  
32  
33  
34  
35  
36

### 37 **Data management and data safety**

38  
39 The investigators will design and produce electronic case report forms (eCRF) for  
40 protocol-required data collection. All information will be entered into these eCRFs by  
41 authorized and trained members of the study team and systematically checked for  
42 accuracy and completeness. Staff members with responsibilities for data collection or  
43 those, having access to the database will be enrolled in a delegation log. Patients' data  
44 collected during the trial will be recorded in pseudonymized form by solely using  
45 individual identification codes.  
46  
47  
48  
49  
50  
51

52 For data assessment using the Ada-App®, a specified iPad will be provided, which will  
53 be registered at the Frankfurt University Hospital and will be exclusively used for the  
54 purpose of this trial. Clinical data will be documented pseudonymously by using a  
55 combination of a random number from 1 to 450 and the patient's year of birth.  
56 Participants are then asked to answer the questionnaire of the Ada-App® preferably by  
57  
58  
59  
60

1  
2  
3 themselves or otherwise assisted by the study team. The diagnoses will be manually  
4 transferred into the eCRF of the related patient after trial completion and unblinding.  
5  
6

7 All trial data obtained will be integrated into a statistical analysis software and analyzed  
8 by the Institute of Biostatistics and Mathematical Modeling Frankfurt.  
9  
10

### 11 **Publication policy**

12  
13 The results of this trial will be submitted for publication in a peer-reviewed journal in a  
14 summarized anonymized manner. The study is scientifically supported by the Barmer  
15 health insurance company. Barmer will act as a scientific advisor regarding the conduct  
16 of the study, will be involved in the process of interpreting the data and in the  
17 publication and public distribution process of the study after trial completion. However,  
18 there will be no raw data sharing or financial support from the institution.  
19  
20  
21  
22  
23

### 24 **Statistical analysis**

#### 25 ***Interim analysis***

26  
27 One formal unblinded interim analysis of the trial data is planned to be performed after  
28 enrollment of about 200 patients to evaluate the diagnostic accuracy of the Ada-App®  
29 with 90-days follow-up information. Statistical analysis will be performed by the  
30 responsible study biometrician using a significance level of  $\alpha = 0.001$  and a  
31 subsequent report will be written. These results will be discussed with the investigators  
32 and the study team in a staff meeting and the continuation of the trial will be considered.  
33  
34  
35  
36  
37  
38  
39

#### 40 **Sample size calculation and study duration**

41  
42 The assumptions that were made, was that more than 30% of the admission diagnoses  
43 are not consistent with the final discharge diagnosis and hypothesized that the Ada-  
44 App® will increase the diagnostic accuracy from 70% to a rate of 85%. Providing a  
45 power of 90% and a two-sided significance level of  $\alpha 5\%$ , a target sample size of  
46  $N = 405$  patients has to be recruited to detect the targeted effect. With an estimated  
47 dropout rate of 10%, we plan to recruit  $N = 450$  patients in this trial. Furthermore, we  
48 expect the width of the confidence intervals for the diagnostic accuracy to be 0.1 at  
49 maximum (0.09 with an estimated diagnostic accuracy of 0.7, 0.07 with an estimated  
50 diagnostic accuracy of 0.85).  
51  
52  
53  
54  
55  
56  
57  
58  
59  
60

1  
2  
3 This trial is anticipated to start in September 2020 and the duration of patient's  
4 participation is 3 months including follow-up. To achieve the required sample size of  
5 patients, trial completion is expected to be in 12 months (August 2020).  
6  
7

### 8 9 **Ethical and legal aspects, consent**

10  
11 The eRadaR trial will be conducted in accordance with the Declaration of Helsinki and  
12 the international conference of harmonization good clinical practice (ICH-GCP)  
13 guidelines. After a patient has been identified to meet eligibility criteria, the patient will  
14 be informed about the aim, outline and individual risk of the study and informed consent  
15 will be given. After a sufficient period, the patient can then sign informed consent and  
16 will receive a signed copy.  
17  
18  
19  
20  
21

### 22 **Patient and Public involvement**

23  
24 Patients were not involved in the development of the research question or study  
25 design. They will however be involved in visit 1 and will be interviewed by the study  
26 team using the Ada-App®. Further, the follow-up (visit 5) will be performed as a  
27 telephone interview or in person with the patients for data assessment.  
28  
29  
30  
31  
32  
33  
34  
35  
36  
37  
38  
39  
40  
41  
42  
43  
44  
45  
46  
47  
48  
49  
50  
51  
52  
53  
54  
55  
56  
57  
58  
59  
60

## Discussion

Diagnostic errors have been identified as a serious threat to patient safety, leading to preventable adverse events, particularly in ERs with a disruptive environment. AI-based tools and algorithms have the potential to substantially reduce diagnostic failures, achieving high rates of diagnostic accuracy, which rivals the capability of clinicians.

A previous study provides an overview of the main types of existing tools, which are classified into categories related to the targeted step of diagnostic processing [25]. Over the past few decades, a number of computerized DDSS have been developed, exhibiting promising diagnostic efficacy. Bond *et al.* evaluated four current DDSS using clinical cases from the *New England Journal of Medicine*, demonstrating that Isabel and Dxplain achieve the strongest performance [31]. Compared to former programs, second-generation DDSS are far more powerful, providing more accurate suggestions with increasing complexity, while concomitantly requiring less time for diagnosing [21, 24]. This is primarily essential in an era of ER crowding, where fast and accurate triaging is necessary to prioritize critically ill patients and to optimize resource allocation [8]. Stewart *et al.* recently summarized various fields of AI application becoming relevant in emergency medicine, including imaging, decision-making, and outcome prediction [32]. In terms of triaging, a machine learning-based tool efficiently predicts critical patient outcome, equivalent to the classically used Emergency Severity Index [33]. In a prospective, multi-center study, the DDSS Isabel achieved high accuracy in diagnosing patients presenting to the ER, suggesting the final discharge diagnosis in 95% of cases [34]. Another clinical decision support system has been evaluated in patients presenting with acute abdominal pain aiming to identify high-risk patients for acute appendicitis [35]. Based on automated methods and an integrated risk calculator, patient data was assessed from the electronic health record (EHR) and management strategies suggested according to the risk level. Incorporation into EHR represents one of the most recent advances in the development of DDSS using 'natural language processing' techniques, which matches entered clinical data with the underlying knowledge base [36]. This might facilitate assessment of larger volumes of data, save more time, and might increase acceptance of DDSS in clinical workflow.

However, in most of these trials using clinical support systems, impact on patient outcome, or on healthcare costs were not assessed. Although diagnoses suggested

1  
2  
3 by DDSS mostly contained the correct diagnosis and achieved high level of users'  
4 satisfaction, relevance, and specificity of extensive lists were low [21, 24, 31]. Long  
5 lists may lead to distraction or to unnecessary diagnostic with increased risk for  
6 iatrogenic injuries and costs. In general, despite the given potential efficacy of DDSS,  
7 widespread acceptance for implementation of DDSS into the routine clinical practice is  
8 evolving scarcely [37]. Studies focusing on AI-based diagnostic tools are generally  
9 designed heterogeneously and are often of poor quality, making it difficult to  
10 recommend widespread evidence-based clinical application [21, 25]. While most of the  
11 current trials demonstrated high diagnostic accuracy in retrospective and simulated  
12 cases, only few studies evaluated their performance in real clinical settings, particularly  
13 in high stress environments like ERs. Thus, further validations in prospective studies  
14 are required to investigate the diagnostic efficiency and utility of DDSS and their impact  
15 on routine clinical decision-making and patient outcome.

### 26 **Trial status**

27  
28 Ethical approval for this trial was granted by an independent ethics committee (IEC) of  
29 the Goethe-University Frankfurt on 9<sup>th</sup> April 2020 and anticipated trial start date is  
30 September 2020.

### 34 **Abbreviations**

35  
36 AI, Artificial Intelligence; App, Application; CCI, Comprehensive Complication Index;  
37 CDC, Clavien-Dindo classification; DRKS, Deutsches Register Klinische Studien  
38 (German Clinical Trials Register); eCRF, electronic case report form; DDSS,  
39 Diagnostic Decision Support System; ER, Emergency Room; EHR, Electronic Health  
40 Record; FU, Follow-Up; ICD-10, International Classification of Diseases; ICH-GCP,  
41 International Conference of Harmonisation, Good Clinical Practice; IEC, Independent  
42 ethics committee; OPS, Operations and Procedures; RAI-C, Risk Analysis Index-C  
43 score.

### 51 **Acknowledgments**

52  
53 We would like to thank Rene Wendel, Doreen Giannico, Dr. Johannes Masseli, Prof.  
54 Stefan Zeuzem, and the whole administrative and medical team of the central  
55 emergency room of the Frankfurt University Hospital for their support.

56  
57 We further are grateful for our established scientific support with the Barmer health  
58 care insurance company.  
59  
60

## **Funding**

There is no funding for this trial from third parties or grants. This is an investigator-initiated trial.

## **Competing interest**

No competing interests were detected for the specific trial.

## **Author Contributions**

SFF has written the manuscript, was involved in writing the protocol, and is the clinical lead surgeon for the trial.

NF performed the sample size calculation for the trial and was involved in drafting the protocol and the manuscript.

MvW supported the trial as Chief Medical Informatics Officer (CMIO) of the hospital, and was involved in drafting the protocol and the manuscript

CD and DM were involved in creating the idea and drafting the protocol and the manuscript and prepared the CRF logistics.

UK is the quality manager of the surgical department and supervised implementation of the project in the ER.

UM is the BARMER health insurance representative and is an external advisor to the trial. She drafted the protocol and the manuscript.

LA, PB, PS are medical students triaging the patients and putting up logistics in the ER. They all were involved in creating the idea and shaping the project.

WOB gave valuable input into the project, supports it majorly as chair of the department, and creates a culture for innovative projects. He further drafted the protocol and manuscript.

AAS had the idea for the project, leads the trial group and links all parties involved. He is the responsible principal investigator for the trial.

## **Availability of data and materials**

Data and material will be available after an adequate research proposal has been made and reviewed by the responsible persons at the University. The requests will be forwarded to our Ethics committee and the requesting party will be responsible to get



1  
2  
3 permission to do posthoc analysis and will be also liable for any costs arising from the  
4 requests.  
5

6  
7 **Consent for publication**  
8

9 All authors read and consented to the publication of the current version of this  
10 manuscript.  
11  
12  
13  
14  
15  
16  
17  
18  
19  
20  
21  
22  
23  
24  
25  
26  
27  
28  
29  
30  
31  
32  
33  
34  
35  
36  
37  
38  
39  
40  
41  
42  
43  
44  
45  
46  
47  
48  
49  
50  
51  
52  
53  
54  
55  
56  
57  
58  
59  
60

For peer review only

## References

1. Balla J, Heneghan C, Goyder C, Thompson M. Identifying early warning signs for diagnostic errors in primary care: a qualitative study. *BMJ Open* 2012.
2. World Health Organization. Patient Safety and Risk Management Service Delivery and Safety. Accessed Sept 2019. [https://www.who.int/features/factfiles/patient\\_safety/en/](https://www.who.int/features/factfiles/patient_safety/en/).
3. Kohn LT, Corrigan JM, Donaldson MS, editors. *To Err is Human: Building a Safer Health System*. Washington (DC); 2000.
4. Bhasale AL, Miller GC, Reid SE, Britt HC. Analysing potential harm in Australian general practice: an incident-monitoring study. *Med J Aust*. 1998;169.
5. Leape LL, Brennan TA, Laird N, Lawthers AG, Localio AR, Barnes BA, et al. The nature of adverse events in hospitalized patients. Results of the Harvard Medical Practice Study II. *N Engl J Med*. 1991;324.
6. Studdert DM, Mello MM, Gawande AA, Gandhi TK, Kachalia A, Yoon C, et al. Claims, errors, and compensation payments in medical malpractice litigation. *N Engl J Med*. 2006;354.
7. Berner ES, Graber ML. Overconfidence as a cause of diagnostic error in medicine. *Am J Med*. 2008;121.
8. Hautz SC, Schuler L, Kämmer JE, Schaubert SK, Ricklin ME, Sauter TC, et al. Factors predicting a change in diagnosis in patients hospitalised through the emergency room: a prospective observational study. *BMJ Open*. 2016;6.
9. Graber ML, Franklin N, Gordon R. Diagnostic error in internal medicine. *Arch Intern Med*. 2005;165.
10. Morley C, Unwin M, Peterson GM, Stankovich J, Kinsman L. Emergency department crowding: A systematic review of causes, consequences and solutions. *PLoS ONE*. 2018;13.
11. Eames J, Eisenman A, Schuster RJ. Disagreement between emergency department admission diagnosis and hospital discharge diagnosis: mortality and morbidity. *Diagnosis (Berl)*. 2016;3.

12. Ben-Assuli O, Sagi D, Leshno M, Ironi A, Ziv A. Improving diagnostic accuracy using EHR in emergency departments: A simulation-based study. *J Biomed Inform.* 2015;55.
13. Bernhard M, Raatz C, Zahn P, Merker A, Gries A. Validity of admission diagnoses as process-driving criteria. Influence on length of stay and consultation rate in emergency departments. *Anaesthesist.* 2013;62.
14. Macaluso CR, McNamara RM. Evaluation and management of acute abdominal pain in the emergency department. *Int J Gen Med.* 2012;5.
15. Chiu HS, Chan KF, Chung CH, Ma K, Au KW. A Comparison of Emergency Department Admission Diagnoses and Discharge Diagnoses: Retrospective Study. *Hong Kong Journal of Emergency Medicine.* 2003;10.
16. Kryzauskas M, Danys D, Poskus T, Mikalauskas S, Poskus E, Jotautas V, et al. Is acute appendicitis still misdiagnosed? *Open Med (Wars).* 2016;11.
17. Johnson T, McNutt R, Odwazny R, Patel D, Baker S. Discrepancy between admission and discharge diagnoses as a predictor of hospital length of stay. *J Hosp Med.* 2009;4.
18. McWilliams A, Tapp H, Barker J, Dulin M. Cost analysis of the use of emergency departments for primary care services in Charlotte, North Carolina. *N C Med J.* 2011;72.
19. Mistry B, Stewart De Ramirez S, Kelen G, Schmitz PSK, Balhara KS, Levin S, et al. Accuracy and Reliability of Emergency Department Triage Using the Emergency Severity Index: An International Multicenter Assessment. *Ann Emerg Med.* 2018;71.
20. Middleton B, Sittig DF, Wright A. Clinical Decision Support: a 25 Year Retrospective and a 25 Year Vision. *Yearb Med Inform.* 2016;Suppl 1.
21. Riches N, Panagioti M, Alam R, Cheraghi-Sohi S, Campbell S, Esmail A, Bower P. The Effectiveness of Electronic Differential Diagnoses (DDX) Generators: A Systematic Review and Meta-Analysis. *PLoS ONE.* 2016;11.
22. Jungmann SM, Klan T, Kuhn S, Jungmann F. Accuracy of a Chatbot (Ada) in the Diagnosis of Mental Disorders: Comparative Case Study With Lay and Expert Users. *JMIR Form Res.* 2019;3.

23. Ronicke S, Hirsch MC, Türk E, Larionov K, Tientcheu D, Wagner AD. Can a decision support system accelerate rare disease diagnosis? Evaluating the potential impact of Ada DX in a retrospective study. *Orphanet J Rare Dis.* 2019;14.
24. Graber ML, Mathew A. Performance of a web-based clinical diagnosis support system for internists. *J Gen Intern Med.* 2008;23 Suppl 1.
25. El-Kareh R, Hasan O, Schiff GD. Use of health information technology to reduce diagnostic errors. *BMJ Qual Saf.* 2013;22 Suppl 2.
26. Hirsch JA, Leslie-Mazwi TM, Nicola GN, Oklu R, Schoppe KA, Silva E, Manchikanti L. The ICD-10 system: a gift that keeps on taking. *J Neurointerv Surg.* 2015;7.
27. Hall DE, Arya S, Schmid KK, Blaser C, Carlson MA, Bailey TL, et al. Development and Initial Validation of the Risk Analysis Index for Measuring Frailty in Surgical Populations. *JAMA Surg.* 2017;152.
28. Charlson M, Szatrowski TP, Peterson J, Gold J. Validation of a combined comorbidity index. *J Clin Epidemiol.* 1994;47.
29. Clavien P-A, Vetter D, Staiger RD, Slankamenac K, Mehra T, Graf R, Puhan MA. The Comprehensive Complication Index (CCI®): Added Value and Clinical Perspectives 3 Years "Down the Line". *Ann Surg.* 2017;265.
30. Clavien PA, Barkun J, Oliveira ML de, Vauthey JN, Dindo D, Schulick RD, et al. The Clavien-Dindo classification of surgical complications: five-year experience. *Ann Surg.* 2009;250.
31. Bond WF, Schwartz LM, Weaver KR, Levick D, Giuliano M, Graber ML. Differential diagnosis generators: an evaluation of currently available computer programs. *J Gen Intern Med.* 2012;27.
32. Stewart J, Sprivulis P, Dwivedi G. Artificial intelligence and machine learning in emergency medicine. *Emerg Med Australas.* 2018;30.
33. Levin S, Toerper M, Hamrock E, Hinson JS, Barnes S, Gardner H, et al. Machine-Learning-Based Electronic Triage More Accurately Differentiates Patients With Respect to Clinical Outcomes Compared With the Emergency Severity Index. *Ann Emerg Med.* 2018;71.

- 1  
2  
3 34. Ramnarayan P, Cronje N, Brown R, Negus R, Coode B, Moss P, et al. Validation  
4 of a diagnostic reminder system in emergency medicine: a multi-centre study.  
5 Emerg Med J. 2007;24.  
6  
7  
8  
9 35. Ekstrom HL, Kharbanda EO, Ballard DW, Vinson DR, Vazquez-Benitez G,  
10 Chettipally UK, et al. Development of a Clinical Decision Support System for  
11 Pediatric Abdominal Pain in Emergency Department Settings Across Two Health  
12 Systems Within the HCSRN. EGEMS (Wash DC) 2019.  
13  
14  
15  
16 36. Liang H, Tsui BY, Ni H, Valentim CCS, Baxter SL, Liu G, et al. Evaluation and  
17 accurate diagnoses of pediatric diseases using artificial intelligence. Nat Med.  
18 2019;25.  
19  
20  
21  
22 37. Shortliffe EH, Sepúlveda MJ. Clinical Decision Support in the Era of Artificial  
23 Intelligence. JAMA. 2018;320.  
24  
25  
26  
27  
28  
29  
30  
31  
32  
33  
34  
35  
36  
37  
38  
39  
40  
41  
42  
43  
44  
45  
46  
47  
48  
49  
50  
51  
52  
53  
54  
55  
56  
57  
58  
59  
60

1  
2  
3 **Figure legend**  
4

5 **Figure 1: Study flow chart of the eRadaR study.** CCI = Comprehensive complication  
6 index.  
7  
8  
9

10  
11  
12  
13  
14  
15  
16  
17  
18  
19  
20  
21  
22  
23  
24  
25  
26  
27  
28  
29  
30  
31  
32  
33  
34  
35  
36  
37  
38  
39  
40  
41  
42  
43  
44  
45  
46  
47  
48  
49  
50  
51  
52  
53  
54  
55  
56  
57  
58  
59  
60

For peer review only

1  
2  
3  
4  
5  
6  
7  
8  
9  
10  
11  
12  
13  
14  
15  
16  
17  
18  
19  
20  
21  
22  
23  
24  
25  
26  
27  
28  
29  
30  
31  
32  
33  
34  
35  
36  
37  
38  
39  
40  
41  
42  
43  
44  
45  
46  
47  
48  
49  
50  
51  
52  
53  
54  
55  
56  
57  
58  
59  
60

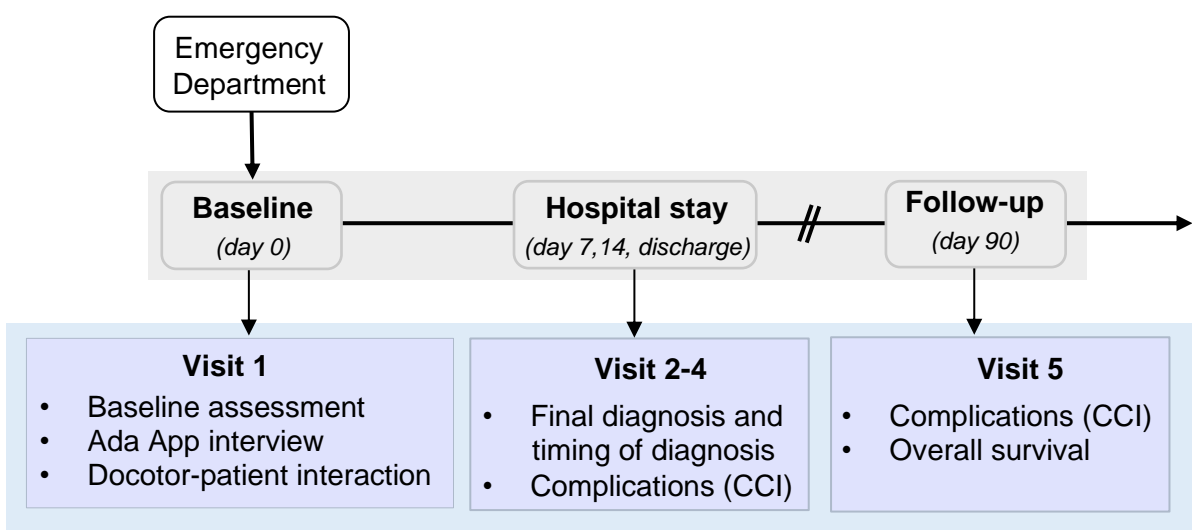

peer review only

# Reporting checklist for protocol of a clinical trial.

Based on the SPIRIT guidelines.

## Instructions to authors

Complete this checklist by entering the page numbers from your manuscript where readers will find each of the items listed below.

Your article may not currently address all the items on the checklist. Please modify your text to include the missing information. If you are certain that an item does not apply, please write "n/a" and provide a short explanation.

Upload your completed checklist as an extra file when you submit to a journal.

In your methods section, say that you used the SPIRIT reporting guidelines, and cite them as:

Chan A-W, Tetzlaff JM, Altman DG, Laupacis A, Gøtzsche PC, Krleža-Jerić K, Hróbjartsson A, Mann H, Dickersin K, Berlin J, Doré C, Parulekar W, Summerskill W, Groves T, Schulz K, Sox H, Rockhold FW, Rennie D, Moher D. SPIRIT 2013 Statement: Defining standard protocol items for clinical trials. *Ann Intern Med.* 2013;158(3):200-207

|                                   | Reporting Item                                                                                                                  | Page Number             |
|-----------------------------------|---------------------------------------------------------------------------------------------------------------------------------|-------------------------|
| <b>Administrative information</b> |                                                                                                                                 |                         |
| Title                             | <a href="#">#1</a> Descriptive title identifying the study design, population, interventions, and, if applicable, trial acronym | 1                       |
| Trial registration                | <a href="#">#2a</a> Trial identifier and registry name. If not yet registered, name of intended registry                        | 2                       |
| Trial registration: data set      | <a href="#">#2b</a> All items from the World Health Organization Trial Registration Data Set                                    | n/a                     |
| Protocol version                  | <a href="#">#3</a> Date and version identifier                                                                                  | 24/03/2020, version 2.0 |
| Funding                           | <a href="#">#4</a> Sources and types of financial, material, and other support                                                  | 15                      |
| Roles and                         | <a href="#">#5a</a> Names, affiliations, and roles of protocol contributors                                                     | 1, 15                   |



responsibilities:

contributorship

Roles and

responsibilities:

sponsor contact

information

Roles and

responsibilities:

sponsor and funder

Roles and

responsibilities:

committees

## Introduction

Background and

rationale

Background and

rationale: choice of

comparators

Objectives

Trial design

## Methods:

Participants,

interventions, and

outcomes

[#5b](#)

Name and contact information for the trial sponsor

1

[#5c](#)

Role of study sponsor and funders, if any, in study design; collection, management, analysis, and interpretation of data; writing of the report; and the decision to submit the report for publication, including whether they will have ultimate authority over any of these activities

n/a, no  
sponsors or  
funders

[#5d](#)

Composition, roles, and responsibilities of the coordinating centre, steering committee, endpoint adjudication committee, data management team, and other individuals or groups overseeing the trial, if applicable (see Item 21a for data monitoring committee)

n/a

[#6a](#)

Description of research question and justification for undertaking the trial, including summary of relevant studies (published and unpublished) examining benefits and harms for each intervention

4-5

[#6b](#)

Explanation for choice of comparators

n/a

[#7](#)

Specific objectives or hypotheses

2

[#8](#)

Description of trial design including type of trial (eg, parallel group, crossover, factorial, single group), allocation ratio, and framework (eg, superiority, equivalence, non-inferiority, exploratory)

6-9

|    |                                 |                      |                                                                                                                                                                                                                                                                                                                                                                                |                               |
|----|---------------------------------|----------------------|--------------------------------------------------------------------------------------------------------------------------------------------------------------------------------------------------------------------------------------------------------------------------------------------------------------------------------------------------------------------------------|-------------------------------|
| 1  | Study setting                   | <a href="#">#9</a>   | Description of study settings (eg, community clinic, academic hospital) and list of countries where data will be collected. Reference to where list of study sites can be obtained                                                                                                                                                                                             | 6                             |
| 2  |                                 |                      |                                                                                                                                                                                                                                                                                                                                                                                |                               |
| 3  |                                 |                      |                                                                                                                                                                                                                                                                                                                                                                                |                               |
| 4  |                                 |                      |                                                                                                                                                                                                                                                                                                                                                                                |                               |
| 5  |                                 |                      |                                                                                                                                                                                                                                                                                                                                                                                |                               |
| 6  |                                 |                      |                                                                                                                                                                                                                                                                                                                                                                                |                               |
| 7  |                                 |                      |                                                                                                                                                                                                                                                                                                                                                                                |                               |
| 8  | Eligibility criteria            | <a href="#">#10</a>  | Inclusion and exclusion criteria for participants. If applicable, eligibility criteria for study centres and individuals who will perform the interventions (eg, surgeons, psychotherapists)                                                                                                                                                                                   | 6                             |
| 9  |                                 |                      |                                                                                                                                                                                                                                                                                                                                                                                |                               |
| 10 |                                 |                      |                                                                                                                                                                                                                                                                                                                                                                                |                               |
| 11 |                                 |                      |                                                                                                                                                                                                                                                                                                                                                                                |                               |
| 12 |                                 |                      |                                                                                                                                                                                                                                                                                                                                                                                |                               |
| 13 |                                 |                      |                                                                                                                                                                                                                                                                                                                                                                                |                               |
| 14 |                                 |                      |                                                                                                                                                                                                                                                                                                                                                                                |                               |
| 15 | Interventions: description      | <a href="#">#11a</a> | Interventions for each group with sufficient detail to allow replication, including how and when they will be administered                                                                                                                                                                                                                                                     | n/a, no interventions planned |
| 16 |                                 |                      |                                                                                                                                                                                                                                                                                                                                                                                |                               |
| 17 |                                 |                      |                                                                                                                                                                                                                                                                                                                                                                                |                               |
| 18 |                                 |                      |                                                                                                                                                                                                                                                                                                                                                                                |                               |
| 19 |                                 |                      |                                                                                                                                                                                                                                                                                                                                                                                |                               |
| 20 | Interventions: modifications    | <a href="#">#11b</a> | Criteria for discontinuing or modifying allocated interventions for a given trial participant (eg, drug dose change in response to harms, participant request, or improving / worsening disease)                                                                                                                                                                               | n/a                           |
| 21 |                                 |                      |                                                                                                                                                                                                                                                                                                                                                                                |                               |
| 22 |                                 |                      |                                                                                                                                                                                                                                                                                                                                                                                |                               |
| 23 |                                 |                      |                                                                                                                                                                                                                                                                                                                                                                                |                               |
| 24 |                                 |                      |                                                                                                                                                                                                                                                                                                                                                                                |                               |
| 25 |                                 |                      |                                                                                                                                                                                                                                                                                                                                                                                |                               |
| 26 |                                 |                      |                                                                                                                                                                                                                                                                                                                                                                                |                               |
| 27 | Interventions: adherence        | <a href="#">#11c</a> | Strategies to improve adherence to intervention protocols, and any procedures for monitoring adherence (eg, drug tablet return; laboratory tests)                                                                                                                                                                                                                              | n/a                           |
| 28 |                                 |                      |                                                                                                                                                                                                                                                                                                                                                                                |                               |
| 29 |                                 |                      |                                                                                                                                                                                                                                                                                                                                                                                |                               |
| 30 |                                 |                      |                                                                                                                                                                                                                                                                                                                                                                                |                               |
| 31 |                                 |                      |                                                                                                                                                                                                                                                                                                                                                                                |                               |
| 32 | Interventions: concomitant care | <a href="#">#11d</a> | Relevant concomitant care and interventions that are permitted or prohibited during the trial                                                                                                                                                                                                                                                                                  | n/a                           |
| 33 |                                 |                      |                                                                                                                                                                                                                                                                                                                                                                                |                               |
| 34 |                                 |                      |                                                                                                                                                                                                                                                                                                                                                                                |                               |
| 35 |                                 |                      |                                                                                                                                                                                                                                                                                                                                                                                |                               |
| 36 | Outcomes                        | <a href="#">#12</a>  | Primary, secondary, and other outcomes, including the specific measurement variable (eg, systolic blood pressure), analysis metric (eg, change from baseline, final value, time to event), method of aggregation (eg, median, proportion), and time point for each outcome. Explanation of the clinical relevance of chosen efficacy and harm outcomes is strongly recommended | 9-10                          |
| 37 |                                 |                      |                                                                                                                                                                                                                                                                                                                                                                                |                               |
| 38 |                                 |                      |                                                                                                                                                                                                                                                                                                                                                                                |                               |
| 39 |                                 |                      |                                                                                                                                                                                                                                                                                                                                                                                |                               |
| 40 |                                 |                      |                                                                                                                                                                                                                                                                                                                                                                                |                               |
| 41 |                                 |                      |                                                                                                                                                                                                                                                                                                                                                                                |                               |
| 42 |                                 |                      |                                                                                                                                                                                                                                                                                                                                                                                |                               |
| 43 |                                 |                      |                                                                                                                                                                                                                                                                                                                                                                                |                               |
| 44 |                                 |                      |                                                                                                                                                                                                                                                                                                                                                                                |                               |
| 45 |                                 |                      |                                                                                                                                                                                                                                                                                                                                                                                |                               |
| 46 |                                 |                      |                                                                                                                                                                                                                                                                                                                                                                                |                               |
| 47 |                                 |                      |                                                                                                                                                                                                                                                                                                                                                                                |                               |
| 48 |                                 |                      |                                                                                                                                                                                                                                                                                                                                                                                |                               |
| 49 | Participant timeline            | <a href="#">#13</a>  | Time schedule of enrolment, interventions (including any run-ins and washouts), assessments, and visits for participants. A schematic diagram is highly recommended (see Figure)                                                                                                                                                                                               | 6-8                           |
| 50 |                                 |                      |                                                                                                                                                                                                                                                                                                                                                                                |                               |
| 51 |                                 |                      |                                                                                                                                                                                                                                                                                                                                                                                |                               |
| 52 |                                 |                      |                                                                                                                                                                                                                                                                                                                                                                                |                               |
| 53 |                                 |                      |                                                                                                                                                                                                                                                                                                                                                                                |                               |
| 54 |                                 |                      |                                                                                                                                                                                                                                                                                                                                                                                |                               |
| 55 |                                 |                      |                                                                                                                                                                                                                                                                                                                                                                                |                               |
| 56 | Sample size                     | <a href="#">#14</a>  | Estimated number of participants needed to achieve study objectives and how it was determined, including clinical and statistical assumptions                                                                                                                                                                                                                                  | 11-12                         |
| 57 |                                 |                      |                                                                                                                                                                                                                                                                                                                                                                                |                               |
| 58 |                                 |                      |                                                                                                                                                                                                                                                                                                                                                                                |                               |
| 59 |                                 |                      |                                                                                                                                                                                                                                                                                                                                                                                |                               |
| 60 |                                 |                      |                                                                                                                                                                                                                                                                                                                                                                                |                               |

supporting any sample size calculations

1  
2  
3 Recruitment [#15](#) Strategies for achieving adequate participant 11-12  
4 enrolment to reach target sample size  
5

6 **Methods:**

7  
8 **Assignment of**  
9 **interventions (for**  
10 **controlled trials)**  
11

12  
13 Allocation: sequence [#16a](#) Method of generating the allocation sequence (eg, n/a  
14 generation computer-generated random numbers), and list of  
15 of any factors for stratification. To reduce predictability  
16 of a random sequence, details of any planned  
17 restriction (eg, blocking) should be provided in a  
18 separate document that is unavailable to those who  
19 enrol participants or assign interventions  
20  
21  
22

23  
24 Allocation [#16b](#) Mechanism of implementing the allocation sequence n/a  
25 concealment (eg, central telephone; sequentially numbered,  
26 opaque, sealed envelopes), describing any steps to  
27 conceal the sequence until interventions are  
28 assigned  
29  
30  
31

32  
33 Allocation: [#16c](#) Who will generate the allocation sequence, who will n/a  
34 implementation enrol participants, and who will assign participants to  
35 interventions  
36  
37

38 Blinding (masking) [#17a](#) Who will be blinded after assignment to interventions n/a  
39 (eg, trial participants, care providers, outcome  
40 assessors, data analysts), and how  
41  
42

43 Blinding (masking): [#17b](#) If blinded, circumstances under which unblinding is n/a  
44 emergency permissible, and procedure for revealing a  
45 unblinding participant's allocated intervention during the trial  
46  
47

48 **Methods: Data**  
49 **collection,**  
50 **management, and**  
51 **analysis**  
52  
53

54  
55 Data collection plan [#18a](#) Plans for assessment and collection of outcome, 10-11  
56 baseline, and other trial data, including any related  
57 processes to promote data quality (eg, duplicate  
58  
59

measurements, training of assessors) and a description of study instruments (eg, questionnaires, laboratory tests) along with their reliability and validity, if known. Reference to where data collection forms can be found, if not in the protocol

|    |                        |                      |                                                           |
|----|------------------------|----------------------|-----------------------------------------------------------|
| 1  |                        |                      |                                                           |
| 2  |                        |                      |                                                           |
| 3  |                        |                      |                                                           |
| 4  |                        |                      |                                                           |
| 5  |                        |                      |                                                           |
| 6  |                        |                      |                                                           |
| 7  |                        |                      |                                                           |
| 8  |                        |                      |                                                           |
| 9  | Data collection plan:  | <a href="#">#18b</a> | Plans to promote participant retention and complete       |
| 10 | retention              |                      | follow-up, including list of any outcome data to be       |
| 11 |                        |                      | collected for participants who discontinue or deviate     |
| 12 |                        |                      | from intervention protocols                               |
| 13 |                        |                      |                                                           |
| 14 |                        |                      |                                                           |
| 15 | Data management        | <a href="#">#19</a>  | Plans for data entry, coding, security, and storage,      |
| 16 |                        |                      | including any related processes to promote data           |
| 17 |                        |                      | quality (eg, double data entry; range checks for data     |
| 18 |                        |                      | values). Reference to where details of data               |
| 19 |                        |                      | management procedures can be found, if not in the         |
| 20 |                        |                      | protocol                                                  |
| 21 |                        |                      |                                                           |
| 22 |                        |                      |                                                           |
| 23 |                        |                      |                                                           |
| 24 |                        |                      |                                                           |
| 25 | Statistics: outcomes   | <a href="#">#20a</a> | Statistical methods for analysing primary and             |
| 26 |                        |                      | secondary outcomes. Reference to where other              |
| 27 |                        |                      | details of the statistical analysis plan can be found, if |
| 28 |                        |                      | not in the protocol                                       |
| 29 |                        |                      |                                                           |
| 30 |                        |                      |                                                           |
| 31 |                        |                      |                                                           |
| 32 | Statistics: additional | <a href="#">#20b</a> | Methods for any additional analyses (eg, subgroup         |
| 33 | analyses               |                      | and adjusted analyses)                                    |
| 34 |                        |                      |                                                           |
| 35 |                        |                      |                                                           |
| 36 | Statistics: analysis   | <a href="#">#20c</a> | Definition of analysis population relating to protocol    |
| 37 | population and         |                      | non-adherence (eg, as randomised analysis), and           |
| 38 | missing data           |                      | any statistical methods to handle missing data (eg,       |
| 39 |                        |                      | multiple imputation)                                      |
| 40 |                        |                      |                                                           |
| 41 |                        |                      |                                                           |
| 42 | <b>Methods:</b>        |                      |                                                           |
| 43 | <b>Monitoring</b>      |                      |                                                           |
| 44 |                        |                      |                                                           |
| 45 |                        |                      |                                                           |
| 46 | Data monitoring:       | <a href="#">#21a</a> | Composition of data monitoring committee (DMC);           |
| 47 | formal committee       |                      | summary of its role and reporting structure; statement    |
| 48 |                        |                      | of whether it is independent from the sponsor and         |
| 49 |                        |                      | competing interests; and reference to where further       |
| 50 |                        |                      | details about its charter can be found, if not in the     |
| 51 |                        |                      | protocol. Alternatively, an explanation of why a DMC      |
| 52 |                        |                      | is not needed                                             |
| 53 |                        |                      |                                                           |
| 54 |                        |                      |                                                           |
| 55 |                        |                      |                                                           |
| 56 |                        |                      |                                                           |
| 57 |                        |                      |                                                           |
| 58 | Data monitoring:       | <a href="#">#21b</a> | Description of any interim analyses and stopping          |
| 59 |                        |                      |                                                           |
| 60 |                        |                      |                                                           |

|    |                      |                      |                                                         |       |
|----|----------------------|----------------------|---------------------------------------------------------|-------|
| 1  | interim analysis     |                      | guidelines, including who will have access to these     |       |
| 2  |                      |                      | interim results and make the final decision to          |       |
| 3  |                      |                      | terminate the trial                                     |       |
| 4  |                      |                      |                                                         |       |
| 5  | Harms                | <a href="#">#22</a>  | Plans for collecting, assessing, reporting, and         | 10    |
| 6  |                      |                      | managing solicited and spontaneously reported           |       |
| 7  |                      |                      | adverse events and other unintended effects of trial    |       |
| 8  |                      |                      | interventions or trial conduct                          |       |
| 9  |                      |                      |                                                         |       |
| 10 |                      |                      |                                                         |       |
| 11 |                      |                      |                                                         |       |
| 12 | Auditing             | <a href="#">#23</a>  | Frequency and procedures for auditing trial conduct,    | n/a   |
| 13 |                      |                      | if any, and whether the process will be independent     |       |
| 14 |                      |                      | from investigators and the sponsor                      |       |
| 15 |                      |                      |                                                         |       |
| 16 |                      |                      |                                                         |       |
| 17 | <b>Ethics and</b>    |                      |                                                         |       |
| 18 | <b>dissemination</b> |                      |                                                         |       |
| 19 |                      |                      |                                                         |       |
| 20 |                      |                      |                                                         |       |
| 21 | Research ethics      | <a href="#">#24</a>  | Plans for seeking research ethics committee /           | 2,12  |
| 22 | approval             |                      | institutional review board (REC / IRB) approval         |       |
| 23 |                      |                      |                                                         |       |
| 24 |                      |                      |                                                         |       |
| 25 | Protocol             | <a href="#">#25</a>  | Plans for communicating important protocol              | 2     |
| 26 | amendments           |                      | modifications (eg, changes to eligibility criteria,     |       |
| 27 |                      |                      | outcomes, analyses) to relevant parties (eg,            |       |
| 28 |                      |                      | investigators, REC / IRBs, trial participants, trial    |       |
| 29 |                      |                      | registries, journals, regulators)                       |       |
| 30 |                      |                      |                                                         |       |
| 31 |                      |                      |                                                         |       |
| 32 |                      |                      |                                                         |       |
| 33 | Consent or assent    | <a href="#">#26a</a> | Who will obtain informed consent or assent from         | 6,12  |
| 34 |                      |                      | potential trial participants or authorised surrogates,  |       |
| 35 |                      |                      | and how (see Item 32)                                   |       |
| 36 |                      |                      |                                                         |       |
| 37 |                      |                      |                                                         |       |
| 38 |                      |                      |                                                         |       |
| 39 | Consent or assent:   | <a href="#">#26b</a> | Additional consent provisions for collection and use    | n/a   |
| 40 | ancillary studies    |                      | of participant data and biological specimens in         |       |
| 41 |                      |                      | ancillary studies, if applicable                        |       |
| 42 |                      |                      |                                                         |       |
| 43 |                      |                      |                                                         |       |
| 44 | Confidentiality      | <a href="#">#27</a>  | How personal information about potential and            | 10-11 |
| 45 |                      |                      | enrolled participants will be collected, shared, and    |       |
| 46 |                      |                      | maintained in order to protect confidentiality before,  |       |
| 47 |                      |                      | during, and after the trial                             |       |
| 48 |                      |                      |                                                         |       |
| 49 |                      |                      |                                                         |       |
| 50 |                      |                      |                                                         |       |
| 51 | Declaration of       | <a href="#">#28</a>  | Financial and other competing interests for principal   | 15    |
| 52 | interests            |                      | investigators for the overall trial and each study site |       |
| 53 |                      |                      |                                                         |       |
| 54 |                      |                      |                                                         |       |
| 55 | Data access          | <a href="#">#29</a>  | Statement of who will have access to the final trial    | 15-16 |
| 56 |                      |                      | dataset, and disclosure of contractual agreements       |       |
| 57 |                      |                      | that limit such access for investigators                |       |
| 58 |                      |                      |                                                         |       |
| 59 |                      |                      |                                                         |       |
| 60 |                      |                      |                                                         |       |

|    |                       |                      |                                                            |       |
|----|-----------------------|----------------------|------------------------------------------------------------|-------|
| 1  | Ancillary and post    | <a href="#">#30</a>  | Provisions, if any, for ancillary and post-trial care, and | 15-16 |
| 2  | trial care            |                      | for compensation to those who suffer harm from trial       |       |
| 3  |                       |                      | participation                                              |       |
| 4  |                       |                      |                                                            |       |
| 5  |                       |                      |                                                            |       |
| 6  | Dissemination policy: | <a href="#">#31a</a> | Plans for investigators and sponsor to communicate         | 11,16 |
| 7  | trial results         |                      | trial results to participants, healthcare professionals,   |       |
| 8  |                       |                      | the public, and other relevant groups (eg, via             |       |
| 9  |                       |                      | publication, reporting in results databases, or other      |       |
| 10 |                       |                      | data sharing arrangements), including any publication      |       |
| 11 |                       |                      | restrictions                                               |       |
| 12 |                       |                      |                                                            |       |
| 13 |                       |                      |                                                            |       |
| 14 |                       |                      |                                                            |       |
| 15 |                       |                      |                                                            |       |
| 16 | Dissemination policy: | <a href="#">#31b</a> | Authorship eligibility guidelines and any intended use     | n/a   |
| 17 | authorship            |                      | of professional writers                                    |       |
| 18 |                       |                      |                                                            |       |
| 19 |                       |                      |                                                            |       |
| 20 | Dissemination policy: | <a href="#">#31c</a> | Plans, if any, for granting public access to the full      | n/a   |
| 21 | reproducible research |                      | protocol, participant-level dataset, and statistical code  |       |
| 22 |                       |                      |                                                            |       |
| 23 |                       |                      |                                                            |       |
| 24 | <b>Appendices</b>     |                      |                                                            |       |
| 25 |                       |                      |                                                            |       |
| 26 | Informed consent      | <a href="#">#32</a>  | Model consent form and other related documentation         | 6,12  |
| 27 | materials             |                      | given to participants and authorised surrogates            |       |
| 28 |                       |                      |                                                            |       |
| 29 |                       |                      |                                                            |       |
| 30 | Biological specimens  | <a href="#">#33</a>  | Plans for collection, laboratory evaluation, and           | n/a   |
| 31 |                       |                      | storage of biological specimens for genetic or             |       |
| 32 |                       |                      | molecular analysis in the current trial and for future     |       |
| 33 |                       |                      | use in ancillary studies, if applicable                    |       |
| 34 |                       |                      |                                                            |       |
| 35 |                       |                      |                                                            |       |

#### Notes:

- 39 • 3: 24/03/2020, version 2.0
- 40
- 41 • 5c: n/a, no sponsors or funders
- 42
- 43
- 44 • 11a: n/a, no interventions planned The SPIRIT checklist is distributed under the terms of the
- 45 Creative Commons Attribution License CC-BY-ND 3.0. This checklist was completed on 06. June
- 46 2020 using <https://www.goodreports.org/>, a tool made by the [EQUATOR Network](#) in collaboration
- 47 with [Penelope.ai](#)
- 48
- 49
- 50
- 51
- 52
- 53
- 54
- 55
- 56
- 57
- 58
- 59

## Note from the Editors: Instructions for reviewers of study protocols

---

Since launching in 2011, BMJ Open has published study protocols for planned or ongoing research studies. If data collection is complete, we will not consider the manuscript.

Publishing study protocols enables researchers and funding bodies to stay up to date in their fields by providing exposure to research activity that may not otherwise be widely publicised. This can help prevent unnecessary duplication of work and will hopefully enable collaboration. Publishing protocols in full also makes available more information than is currently required by trial registries and increases transparency, making it easier for others (editors, reviewers and readers) to see and understand any deviations from the protocol that occur during the conduct of the study.

The scientific integrity and the credibility of the study data depend substantially on the study design and methodology, which is why the study protocol requires a thorough peer-review.

*BMJ Open* will consider for publication protocols for any study design, including observational studies and systematic reviews.

Some things to keep in mind when reviewing the study protocol:

- Protocol papers should report planned or ongoing studies. The dates of the study should be included in the manuscript.
- Unfortunately we are unable to customize the reviewer report form for study protocols. As such, some of the items (i.e., those pertaining to results) on the form should be scores as Not Applicable (N/A).
- While some baseline data can be presented, there should be no results or conclusions present in the study protocol.
- For studies that are ongoing, it is generally the case that very few changes can be made to the methodology. As such, requests for revisions are generally clarifications for the rationale or details relating to the methods. If there is a major flaw in the study that would prevent a sound interpretation of the data, we would expect the study protocol to be rejected.

# BMJ Open

**Study protocol for a prospective, double-blinded, observational study investigating the diagnostic accuracy of an app-based diagnostic health care application in an emergency room setting: the eRadaR-trial**

|                                 |                                                                                                                                                                                                                                                                                                                                                                                                                                                                                                                                                                                                                                                                                                                                                                                                                                                                                                                                                                                          |
|---------------------------------|------------------------------------------------------------------------------------------------------------------------------------------------------------------------------------------------------------------------------------------------------------------------------------------------------------------------------------------------------------------------------------------------------------------------------------------------------------------------------------------------------------------------------------------------------------------------------------------------------------------------------------------------------------------------------------------------------------------------------------------------------------------------------------------------------------------------------------------------------------------------------------------------------------------------------------------------------------------------------------------|
| Journal:                        | <i>BMJ Open</i>                                                                                                                                                                                                                                                                                                                                                                                                                                                                                                                                                                                                                                                                                                                                                                                                                                                                                                                                                                          |
| Manuscript ID                   | bmjopen-2020-041396.R2                                                                                                                                                                                                                                                                                                                                                                                                                                                                                                                                                                                                                                                                                                                                                                                                                                                                                                                                                                   |
| Article Type:                   | Protocol                                                                                                                                                                                                                                                                                                                                                                                                                                                                                                                                                                                                                                                                                                                                                                                                                                                                                                                                                                                 |
| Date Submitted by the Author:   | 07-Dec-2020                                                                                                                                                                                                                                                                                                                                                                                                                                                                                                                                                                                                                                                                                                                                                                                                                                                                                                                                                                              |
| Complete List of Authors:       | Faqar-Uz-Zaman, S. Fatima; Hospital of the Goethe University Frankfurt Surgery Centre, Department for General, Visceral and Transplant Surgery<br>Filmann, Natalie; Institute of Biostatistics and Mathematical Modeling, Goethe-University, Frankfurt/Main,<br>Mahkovic, Dora; Ljubljana Central Medical School<br>von Wagner, Michael; Goethe University Frankfurt<br>Detemble, Charlotte ; Hospital of the Goethe University Frankfurt Surgery Centre<br>Kippke, Ulf; Hospital of the Goethe University Frankfurt Surgery Centre<br>Marschall, Ursula; BARMER<br>Anantharajah, Luxia ; Hospital of the Goethe University Frankfurt Surgery Centre<br>Baumartz, Philipp; Hospital of the Goethe University Frankfurt Surgery Centre<br>Sobotta, Paula ; Hospital of the Goethe University Frankfurt Surgery Centre<br>Bechstein, Wolf; Hospital of the Goethe University Frankfurt Surgery Centre<br>Schnitzbauer, Andreas; Hospital of the Goethe University Frankfurt Surgery Centre |
| <b>Primary Subject Heading</b>: | Surgery                                                                                                                                                                                                                                                                                                                                                                                                                                                                                                                                                                                                                                                                                                                                                                                                                                                                                                                                                                                  |
| Secondary Subject Heading:      | Emergency medicine, Gastroenterology and hepatology, Diagnostics                                                                                                                                                                                                                                                                                                                                                                                                                                                                                                                                                                                                                                                                                                                                                                                                                                                                                                                         |
| Keywords:                       | ACCIDENT & EMERGENCY MEDICINE, Adult gastroenterology < GASTROENTEROLOGY, Adult surgery < SURGERY                                                                                                                                                                                                                                                                                                                                                                                                                                                                                                                                                                                                                                                                                                                                                                                                                                                                                        |
|                                 |                                                                                                                                                                                                                                                                                                                                                                                                                                                                                                                                                                                                                                                                                                                                                                                                                                                                                                                                                                                          |

SCHOLARONE™  
Manuscripts





I, the Submitting Author has the right to grant and does grant on behalf of all authors of the Work (as defined in the below author licence), an exclusive licence and/or a non-exclusive licence for contributions from authors who are: i) UK Crown employees; ii) where BMJ has agreed a CC-BY licence shall apply, and/or iii) in accordance with the terms applicable for US Federal Government officers or employees acting as part of their official duties; on a worldwide, perpetual, irrevocable, royalty-free basis to BMJ Publishing Group Ltd ("BMJ") its licensees and where the relevant Journal is co-owned by BMJ to the co-owners of the Journal, to publish the Work in this journal and any other BMJ products and to exploit all rights, as set out in our [licence](#).

The Submitting Author accepts and understands that any supply made under these terms is made by BMJ to the Submitting Author unless you are acting as an employee on behalf of your employer or a postgraduate student of an affiliated institution which is paying any applicable article publishing charge ("APC") for Open Access articles. Where the Submitting Author wishes to make the Work available on an Open Access basis (and intends to pay the relevant APC), the terms of reuse of such Open Access shall be governed by a Creative Commons licence – details of these licences and which [Creative Commons](#) licence will apply to this Work are set out in our licence referred to above.

Other than as permitted in any relevant BMJ Author's Self Archiving Policies, I confirm this Work has not been accepted for publication elsewhere, is not being considered for publication elsewhere and does not duplicate material already published. I confirm all authors consent to publication of this Work and authorise the granting of this licence.

1  
2  
3  
4 **Study protocol for a prospective, double-blinded, observational study**  
5 **investigating the diagnostic accuracy of an app-based diagnostic health care**  
6 **application in an emergency room setting: the eRadaR-trial**  
7  
8  
9

10  
11 S. Fatima Faqar-Uz-Zaman<sup>1</sup>, Natalie Filmann<sup>2</sup>, Dora Mahkovic<sup>3</sup>, Michael von  
12 Wagner<sup>4</sup>, Charlotte Detemble<sup>1</sup>, Ulf Kippke<sup>1</sup>, Ursula Marschall<sup>5</sup>, Luxia Anantharajah<sup>1</sup>,  
13 Philipp Baumartz<sup>1</sup>, Paula Sobotta<sup>1</sup>, Wolf O. Bechstein<sup>1</sup> and Andreas A. Schnitzbauer<sup>1</sup>  
14  
15  
16  
17

18  
19  
20 <sup>1</sup> Department for General, Visceral and Transplant Surgery, Frankfurt University  
21 Hospital, Theodor-Stern-Kai 7, 60590 Frankfurt, Germany  
22

23  
24 <sup>2</sup> Institute of Biostatistics and Mathematical Modeling, Goethe-University Frankfurt,  
25 Germany  
26

27  
28 <sup>3</sup> MCL Medical Center Ljubljana, Ljubljana, Slovenia  
29

30  
31 <sup>4</sup> Executive Department for Medical IT-Systems and Digitalization, Frankfurt  
32 University Hospital, Germany  
33

34  
35 <sup>5</sup> Barmer health insurance, Germany  
36  
37  
38  
39  
40

41 Corresponding author:  
42

43 Dr. S. Fatima Faqar-Uz-Zaman  
44

45 Department for General, Visceral and Transplant Surgery  
46

47 Frankfurt University Hospital, Goethe-University Frankfurt/Main  
48

49 Theodor-Stern-Kai 7  
50

51 60590 Frankfurt am Main  
52

53 Phone: +49-69-6301-5253  
54

55 Fax: +49-69-6301-84028  
56

57 Email: SaraFatima.Faqar-Uz-Zaman@kgu.de  
58  
59  
60

## Abstract

**Introduction:** Occurrence of inaccurate or delayed diagnoses is a significant concern in patient care, particularly in emergency medicine, where decision-making is often constrained by high throughput and inaccurate admission diagnoses. Artificial intelligence (AI)-based diagnostic decision support system (DDSS) have been developed to enhance clinical performance by suggesting differential diagnoses to a given case, based on an integrated medical knowledge base and machine learning techniques. The purpose of the study is to evaluate the diagnostic accuracy of Ada<sup>®</sup>, an app-based diagnostic tool, and the impact on patient outcome.

**Methods and analysis:** The eRadaR trial is a prospective, double-blinded study with patients presenting to the emergency room (ER) with abdominal pain. At initial contact in the ER, a structured interview will be performed using the Ada-App<sup>®</sup> and both, patients and attending physicians, will be blinded to the proposed diagnosis lists until trial completion. Throughout the study, clinical data relating to diagnostic findings and types of therapy will be obtained and the follow-up until day 90 will comprise occurrence of complications and overall survival of patients. The primary efficacy of the trial is defined by the percentage of correct diagnoses suggested by Ada<sup>®</sup> compared to the final discharge diagnosis. Further, accuracy and timing of diagnosis will be compared to decision-making of classical doctor-patient interaction. Secondary objectives are complications, length of hospital stay, and overall survival.

**Ethics and dissemination:** Ethical approval was received by the independent ethics committee (IEC) of the Goethe-University Frankfurt on 9<sup>th</sup> April 2020 including the patient information material and informed consent form. All protocol amendments must be reported to and adapted by the IEC. The results from this study will be submitted to peer-reviewed journals and reported at suitable national and international meetings.

**Trial registration:** German Clinical Trials Register: DRKS00019098 (registered on 29<sup>th</sup> May 2020).

**Keywords:** Artificial intelligence, diagnostic accuracy, emergency room diagnoses, abdominal pain

## Article Summary

### Strengths and weaknesses of this study

- This is the first prospective study to examine the diagnostic accuracy of an app-based diagnostic tool in an emergency room (ED) and the impact on clinical outcomes.
- The study will be conducted in a real-life setting to investigate the performance in a high stress environment and to provide rationale for routine clinical application.
- The double-blinded design will avoid bias regarding research findings.
- The primary limitation of an observational design is that only associations can be described, not causal relationships.

## Introduction

Diagnostic errors, comprising inaccurate, delayed, or missed diagnoses, are one of the major challenges in public healthcare [1]. In the recent 'Patient Safety Fact File', the World Health Organization (WHO) outlines ten crucial facts about patient safety [2]. Accordingly, adverse events are among the ten leading causes of death and disability, contributing to approximately 10% of patients harmed during hospitalization. Of note, 10% to 20% of adverse events have been quoted to be particularly related to diagnostic failure, causing more harm to patients than medication or treatment errors [3–5]. Further, false or delayed diagnoses are reported to be the most common reason for medical malpractice litigation [6]. Graber *et al.* estimated that diagnostic failures occurred in 5%-15% of cases, depending on the medical specialty with higher percentages assumed in primary care and emergency medicine [7]. Various reasons have been identified to contribute to false diagnoses. Graber concluded that cognitive slips, primarily resulting from faulty information processing and verification, and misguided situational confidence occur most frequently [8, 9].

This is especially evident in ER settings, which often have to deal with high throughputs, fast decision-making, and incomplete clinical information in a disruptive environment. In particular, ER overcrowding has been identified as a serious threat to patient safety, resulting in poor clinical outcome and a significant increase in mortality [10].

Previous studies have revealed that more than 40% of admission diagnoses at first presentation to the ER are not concordant with the final diagnosis of the patient [11–13]. That means, that throughout the hospital stay, the patient experiences a change in diagnosis based on a variety of additional diagnostics and reevaluation of initial assumptions, finally leading to the correct diagnosis. In particular, approximately 30% of patients with abdominal pain, being one of the leading causes for visiting the ER, exhibit a discrepancy in diagnosis [14, 15]. In particular, misdiagnosis rate of acute appendicitis, the most frequent reason for acute abdominal pain, has largely remained unchanged over time and is still associated with a high ratio of negative appendectomies [16]. Inaccurate diagnosing in ERs has been shown to be further associated with increased length of hospital stay, rate of consultations, healthcare cost, and risk for mortality and morbidity, contributing to a serious concern to patient safety [11, 13, 17, 18]. Thus, a high degree of diagnostic accuracy can lead to an

1  
2  
3 improvement in quality of patient care. Correct admission diagnoses are crucial for a  
4 reliable triage and process management and critically influence the initial evaluation in  
5 that ER and subsequent clinical course of the patient [19].  
6  
7

8  
9 Digital technologies and artificial intelligence (AI)-based methods have recently  
10 emerged as impressively powerful tools to empower physicians in clinical decision  
11 making and improve healthcare quality. More specifically, diagnostic decision support  
12 systems (DDSS) have demonstrated to facilitate assessment of clinical data input by  
13 using an extensive medical knowledge base [20, 21]. One version of DDSS is Ada®,  
14 an app-based AI-machine learning system that incorporates patients' symptoms and  
15 other findings into its knowledge base and intelligent technology to deliver effective  
16 healthcare [22, 23]. Based on an algorithmic pathway and driven by chief complaints,  
17 the app-based system generates a set of differential diagnoses for a given clinical  
18 case. Several studies have reported that DDSS have the potential to increase  
19 diagnostic performance, obtaining an accuracy rate of 70-96% [24, 25]. In particular, a  
20 retrospective study of rare diseases has demonstrated that Ada suggests accurate  
21 diagnoses earlier than clinical diagnoses in more than half of all cases [23].  
22  
23  
24  
25  
26  
27  
28  
29  
30

31  
32 However, application of the Ada app has not been investigated in a real-life setting,  
33 particularly in ERs, which has to deal with a high stress environment and heavy time  
34 constraints. This app-based method may be a valuable companion in triaging patients  
35 and support clinicians in making decisions more accurate and sooner by  
36 simultaneously reducing risk for medical errors. Therefore, in the present study, we  
37 aim to evaluate the diagnostic ability of Ada in ER settings and examine the impact on  
38 timing of diagnosis.  
39  
40  
41  
42  
43  
44  
45  
46  
47  
48  
49  
50  
51  
52  
53  
54  
55  
56  
57  
58  
59  
60

## Methods and analysis

The eRadaR-trial is designed as a prospective, double-blinded, observational study evaluating the diagnostic accuracy of the Ada-App® in the ER of the Department of General, Visceral and Transplant Surgery of the Frankfurt University Hospital, Germany. This trial is registered as DRKS00019098 in the German Clinical Trials Register and the trial protocol is written in accordance with the current Standard Protocol Items: Recommendations for Interventional Trials (SPIRIT 2013). The SPIRIT checklist is given in Additional file 1.

### The Ada-App® specifications and rationale to use the software

The Ada-App® is a class I medicinal product certified in accordance with the DIN ISO 13485. Ada is a free-downloadable certified medicinal product and has been validated in different studies by the marketing authorization holder and developer team. It has shown a higher accuracy (73%) in comparison to other apps (38%) when compared to the correctness of symptom checking. The App was superior to other apps when the hitlist of the 5 most probable diagnoses were compared (84% vs. 51%) [22, 26–32].

The evidence shows that the algorithm is superior to other solutions on the market, it has been validated by the company, and the data were the basis for the certification as a medicinal product class I (CE-mark in accordance with DIN ISO 13485), supporting our rationale to test the potentially most beneficial and promising software on the market.

### Study population and eligibility criteria

All patients presenting to the ER with abdominal pain will form the study population and be screened for trial eligibility. Notably, patients presenting with abdominal pain as part of multiple chief complaints (e.g. chest pain and abdominal pain) will also be included in the study. Moreover, patients, who will be immediately discharged from the ED on the same day and patients, who will be admitted to the hospital after presenting to the ER will be both included in the study and followed up in an intention-to-treat fashion. Inclusion criteria comprise: (a.) adults aged  $\geq 18$  years, (b.) patients presenting with abdominal pain to the ER, and (c.) patients willing to participate and able to provide written informed consent. The criteria of exclusion are: (a.) intubated patients, (b.) unstable patients or (c.) patients with severe injuries requiring immediate medical treatment, (d.) patients unwilling or incapable of providing informed consent. Eligible

1  
2  
3 patients are asked for their participation in the trial and written informed consent will  
4 be obtained from themselves. All reasons for exclusion of patients will be recorded in  
5 the trial screening log and analyzed accordingly.  
6  
7

### 8 9 **Description of study visits and assessment schedule**

10  
11 Eligible patients will be interviewed by the study team with the Ada-App® based on an  
12 algorithmic pathway of questions relating to the symptoms. The Ada-App® will only  
13 obtain data about patient demographics, patient history, and information about current  
14 complaints. Patient's name and date of birth will be pseudonymized using an individual  
15 identification code, as described in the section 'data management and data safety'.  
16 Throughout the study, the patient, the study team, and the physician treating the patient  
17 will be blinded regarding the list of proposed diagnoses by the app. The patient will  
18 subsequently be diagnosed by classical doctor-patient interaction and decision-  
19 making. The clinical course of the patient will be followed until day 90 after initial  
20 contact in the ER. Detailed information about outline of the study and assessment  
21 schedule are displayed in Table1 and Figure1.  
22  
23  
24  
25  
26  
27  
28  
29  
30  
31  
32  
33  
34  
35  
36  
37  
38  
39  
40  
41  
42  
43  
44  
45  
46  
47  
48  
49  
50  
51  
52  
53  
54  
55  
56  
57  
58  
59  
60



**Table 1** Schedule of study visits and assessments of the eRadaR study

|                               | Baseline      | Hospital stay*          | Discharge | 90-days FU     |
|-------------------------------|---------------|-------------------------|-----------|----------------|
| Visits                        | V1<br>(Day 0) | V2 and 3<br>(Day 7, 14) | V4        | V5<br>(Day 90) |
| Informed consent              | X             |                         |           |                |
| Eligibility criteria          | X             |                         |           |                |
| Demographic data:             | X             |                         |           | X              |
| a) Charlson Comorbidity Index | X             |                         |           |                |
| b) RAI-C score                |               |                         |           |                |
| Ada diagnosis list            | X             |                         |           |                |
| ICD-10 diagnoses              | X             |                         | X         | X              |
| Symptoms                      | X             |                         |           |                |
| Diagnostics**                 |               | X                       | X         |                |
| Therapy and OPS-code          |               | X                       | X         |                |
| Rate of consultations         |               |                         | X         |                |
| Complications (CCI)           |               | X                       | X         | X              |
| Length of hospital stay       |               |                         | X         |                |
| Overall survival              |               |                         |           | X              |

\* Visit 2 or 3 are left out, if the patient is discharged before

\*\* Diagnostics include:

a) Routine blood samples (C-reactive protein, White blood cells, Hemoglobin, Platelets, Sodium, Potassium, Creatinine, Albumin, Bilirubin, INR)

b) Instrumental diagnostics (Ultrasound, Chest/Abdominal CT/MRI, ECG, Endoscopy)

RAI-C = Risk Analysis C score; ICD = International Classification of Diseases; OPS = Operations and Procedures;

CCI = Comprehensive Complication Index, FU = Follow-up, V = visit

### **Patient presenting to the ED (Visit 1)**

After enrollment in the trial, a structured interview with the Ada-App® will be conducted and baseline data will be assessed including demographic data according to the Carlson Comorbidity Index and the Risk Analysis Index-C score (RAI-C score), the patients' symptoms and ICD-10 diagnoses list [33–35]. Participants are then diagnosed and treated according to the standard of care by the attending physician of the ER. As this is a double-blinded study to patients and treating physicians, Ada-App®

1  
2  
3 diagnoses lists will be randomly allocated to a study-ID and then manually transferred  
4 into the electronic case report forms (eCRF). The trial personnel will be blinded until  
5 the end of the study to avoid bias regarding subsequent diagnoses and treatment of  
6 the patient, except of the interim analysis, which is mentioned in the section of  
7 statistical analysis.  
8  
9

### 10 11 12 ***Hospital stay (Visit 2, day 7)*** 13

14 This visit is performed on day 7, after the patient is admitted to the hospital. Data about  
15 diagnostics and therapies are assessed comprising laboratory results (i.e. C-reactive  
16 protein, white blood cells, platelets, hemoglobin, bilirubin, creatinine, sodium and  
17 potassium, albumin, INR), computer-assisted diagnostics (i.e. ultrasound,  
18 chest/abdominal CT/MRI, ECG, endoscopy), type of therapy (conservative,  
19 interventional or surgery), OPS-code of therapies and complications according to the  
20 Comprehensive Complication Index (CCI) together with the date of occurrence [36]. If  
21 the patient has not been admitted to the hospital or is discharged before day 7, visit 2  
22 is left out.  
23  
24  
25  
26  
27  
28  
29

### 30 31 ***Hospital stay (Visit 3, day 14)*** 32

33 Visit 3 is performed on day 14 after patient's admission and assessment schedule is  
34 equivalent to visit 2. If the patient has not been admitted to the hospital or is discharged  
35 before day 14, visit 3 is left out.  
36  
37

### 38 39 ***Discharge (Visit 4)*** 40

41 At discharge, data including the final ICD-10 diagnosis and the timing of diagnosis will  
42 be recorded to subsequently analyze the accuracy and the timing of the Ada-App®  
43 compared to the classical doctor-patient-encounter. Further data items include  
44 diagnostics (laboratory, instrumental), OPS-codes and type of therapies, complications  
45 according to CCI, length of hospital stay, overall health cost, rate of consultation.  
46  
47  
48  
49

### 50 51 ***Follow-up (Visit 5)*** 52

53 The follow-up will be performed as a structured telephone interview or in person on  
54 day 90 and will encompass following data items: demographic data according to the  
55 RAI-C score, complication assessment according to CCI and overall survival.  
56  
57

### 58 59 **Interventions** 60

1  
2  
3 As this is an observational, double-blinded, prospective study, no experimental or  
4 control interventions are conducted.  
5  
6

## 7 **Endpoints**

### 8 ***Primary endpoint***

9  
10  
11 The primary endpoint of this study is to evaluate the diagnostic accuracy of the Ada-  
12 App® by comparing the decision-making of the classical doctor-patient interaction with  
13 the diagnoses proposed by the app-based algorithm.  
14  
15  
16

### 17 ***Secondary endpoint***

18  
19  
20 Secondary endpoints of this study consist of the following: timing of final discharge  
21 diagnosis and time to treatment during hospital stay, comparing accurate diagnoses  
22 with discharge diagnoses as descriptive assessments, the occurrence of complications  
23 according to the CCI, total length of stay in hospital from initial contact in the ER until  
24 discharge, patient morbidity and mortality at day 90, overall health cost analysis and  
25 consultation rate. Further endpoints are displayed in the description of assessment  
26 schedule (Table1).  
27  
28  
29  
30  
31

## 32 **Measurement methods**

33  
34 For data capture, following measurement methods will be used:  
35  
36

- 37 1. Primary outcome measurement will be performed using the Ada-App® which will  
38 deliver a set of differential diagnoses to a given clinical case [23]. Based on an  
39 algorithmic questionnaire and machine learning technologies, the Ada chatbot  
40 assesses symptoms of the patient, similar to the anamnestic techniques and clinical  
41 reasoning of physicians. Patients' data are integrated into an extensive knowledge  
42 base, which has been specifically designed by medical doctors by incorporating  
43 validated disease models and comprehensive medical literature. Then, differential  
44 diagnoses are generated and ranked in order considering two features: the  
45 probability, based on epidemiologic data, and the best match between the  
46 diagnosis and the given symptoms. Through AI-based methods and multiple  
47 feedback loops, the Ada® knowledge base grows after each interaction and  
48 diagnostic ability improves continuously.  
49
- 50 2. The occurrence of complications as secondary outcomes will be evaluated and  
51 analyzed according to the Comprehensive Complication Index (CCI) [36]. The CCI  
52 represents the standard assessment of postoperative morbidity and comprises all  
53  
54  
55  
56  
57  
58  
59  
60

1  
2  
3 complications occurring during a patient's course based on the Clavien-Dindo  
4 classification (CDC). Compared to the CDC, which ranks complications based on  
5 the severity of the therapeutic consequence and grades them in 5 levels, the CCI  
6 uses a formula to integrate all complications, ranging them from 0 ('no  
7 complication') to 100 ('death') [37]. This advanced approach enables comparison  
8 of patients harboring more than one complication and takes more subtle differences  
9 into consideration.

- 10  
11  
12  
13  
14  
15 3. For assessment of comorbid diseases and frailty-associated risk in a surgical  
16 population, we will use the Charlson Comorbidity Index and the RAI-C score.

### 17 18 19 **Risk-Benefit assessment**

20  
21 This is an observational, non-interventional study and does not comprise any specific  
22 risk for the patient, as data obtained with the app are not used in the ER standard of  
23 care. Therefore, there is no special need for additional safety management. A delay in  
24 the diagnosis and treatment of patients presenting to the ER is not expected, as the  
25 app-based interview will not require more than 10 minutes and will exclusively be  
26 performed in the waiting zone of the ER by the study team. Baseline assessment  
27 (during visit 1) will directly be conducted after patient has been registered at the ER  
28 and given informed consent. Besides that, unstable patients requiring immediate  
29 medical care are excluded from the study beforehand.

### 30 31 32 33 34 35 36 37 **Data management and data safety**

38  
39 The investigators will design and produce electronic case report forms (eCRF) for  
40 protocol-required data collection. All information will be entered into these eCRFs by  
41 authorized and trained members of the study team and systematically checked for  
42 accuracy and completeness. Staff members with responsibilities for data collection or  
43 those, having access to the database will be enrolled in a delegation log. Patients' data  
44 collected during the trial will be recorded in pseudonymized form by solely using  
45 individual identification codes.

46  
47 For data assessment using the Ada-App®, a specified iPad will be provided, which will  
48 be registered at the Frankfurt University Hospital and will be exclusively used for the  
49 purpose of this trial. Clinical data will be documented pseudonymously by using a  
50 combination of a random number from 1 to 450 and the patient's year of birth.  
51 Participants are then asked to answer the questionnaire of the Ada-App® preferably by  
52  
53  
54  
55  
56  
57  
58  
59  
60

1  
2  
3 themselves or otherwise assisted by the study team. The diagnoses will be manually  
4 transferred into the eCRF of the related patient after trial completion and unblinding.  
5  
6

7 All trial data obtained will be integrated into a statistical analysis software and analyzed  
8 by the Institute of Biostatistics and Mathematical Modeling Frankfurt.  
9

### 10 **Ethics and dissemination**

11  
12  
13 The eRadaR trial will be conducted in accordance with the Declaration of Helsinki and  
14 the international conference of harmonization good clinical practice (ICH-GCP)  
15 guidelines. After a patient has been identified to meet eligibility criteria, the patient will  
16 be informed about the aim, outline and individual risk of the study and informed consent  
17 will be given. After a sufficient period, the patient can then sign informed consent and  
18 will receive a signed copy.  
19  
20  
21  
22  
23

24 The results of this trial will be submitted for publication in a peer-reviewed journal in a  
25 summarized anonymized manner. The study is scientifically supported by the Barmer  
26 health insurance company. Barmer will act as a scientific advisor regarding the conduct  
27 of the study, will be involved in the process of interpreting the data and in the  
28 publication and public distribution process of the study after trial completion. However,  
29 there will be no raw data sharing or financial support from the institution.  
30  
31  
32  
33  
34

### 35 **Statistical analysis**

#### 36 ***Interim analysis***

37  
38 One formal unblinded interim analysis of the trial data is planned to be performed after  
39 enrollment of about 200 patients to evaluate the diagnostic accuracy of the Ada-App®  
40 with 90-days follow-up information. Statistical analysis will be performed by the  
41 responsible study biometrician using a significance level of  $\alpha = 0.001$  and a  
42 subsequent report will be written. These results will be discussed with the investigators  
43 and the study team in a staff meeting and the continuation of the trial will be considered.  
44  
45  
46  
47  
48  
49  
50

#### 51 **Sample size calculation and study duration**

52  
53 The assumptions that were made, was that more than 30% of the admission diagnoses  
54 are not consistent with the final discharge diagnosis and hypothesized that the Ada-  
55 App® will increase the diagnostic accuracy from 70% to a rate of 85%. Providing a  
56 power of 90% and a two-sided significance level of  $\alpha$  5%, a target sample size of  
57  $N = 405$  patients has to be recruited to detect the targeted effect. With an estimated  
58  
59  
60

1  
2  
3 dropout rate of 10%, we plan to recruit  $N = 450$  patients in this trial. Furthermore, we  
4 expect the width of the confidence intervals for the diagnostic accuracy to be 0.1 at  
5 maximum (0.09 with an estimated diagnostic accuracy of 0.7, 0.07 with an estimated  
6 diagnostic accuracy of 0.85).  
7  
8  
9

10 This trial is anticipated to start in September 2020 and the duration of patient's  
11 participation is 3 months including follow-up. To achieve the required sample size of  
12 patients, trial completion is expected to be in 12 months (August 2020).  
13  
14  
15

### 16 **Patient and Public involvement**

17  
18 Patients were not involved in the development of the research question or study  
19 design. They will however be involved in visit 1 and will be interviewed by the study  
20 team using the Ada-App<sup>®</sup>. Further, the follow-up (visit 5) will be performed as a  
21 telephone interview or in person with the patients for data assessment.  
22  
23  
24  
25  
26  
27  
28  
29  
30  
31  
32  
33  
34  
35  
36  
37  
38  
39  
40  
41  
42  
43  
44  
45  
46  
47  
48  
49  
50  
51  
52  
53  
54  
55  
56  
57  
58  
59  
60

## Discussion

Diagnostic errors have been identified as a serious threat to patient safety, leading to preventable adverse events, particularly in ERs with a disruptive environment. AI-based tools and algorithms have the potential to substantially reduce diagnostic failures, achieving high rates of diagnostic accuracy, which rivals the capability of clinicians.

A previous study provides an overview of the main types of existing tools, which are classified into categories related to the targeted step of diagnostic processing [25]. Over the past few decades, a number of computerized DDSS have been developed, exhibiting promising diagnostic efficacy. Bond *et al.* evaluated four current DDSS using clinical cases from the *New England Journal of Medicine*, demonstrating that Isabel and Dxplain achieve the strongest performance [38]. Compared to former programs, second-generation DDSS are far more powerful, providing more accurate suggestions with increasing complexity, while concomitantly requiring less time for diagnosing [21, 24]. This is primarily essential in an era of ER crowding, where fast and accurate triaging is necessary to prioritize critically ill patients and to optimize resource allocation [8]. Stewart *et al.* recently summarized various fields of AI application becoming relevant in emergency medicine, including imaging, decision-making, and outcome prediction [39]. In terms of triaging, a machine learning-based tool efficiently predicts critical patient outcome, equivalent to the classically used Emergency Severity Index [40]. In a prospective, multi-center study, the DDSS Isabel achieved high accuracy in diagnosing patients presenting to the ER, suggesting the final discharge diagnosis in 95% of cases [41]. Another clinical decision support system has been evaluated in patients presenting with acute abdominal pain aiming to identify high-risk patients for acute appendicitis [42]. Based on automated methods and an integrated risk calculator, patient data was assessed from the electronic health record (EHR) and management strategies suggested according to the risk level. Incorporation into EHR represents one of the most recent advances in the development of DDSS using 'natural language processing' techniques, which matches entered clinical data with the underlying knowledge base [43]. This might facilitate assessment of larger volumes of data, save more time, and might increase acceptance of DDSS in clinical workflow.

However, in most of these trials using clinical support systems, impact on patient outcome, or on healthcare costs were not assessed. Although diagnoses suggested

1  
2  
3 by DDSS mostly contained the correct diagnosis and achieved high level of users'  
4 satisfaction, relevance, and specificity of extensive lists were low [20, 25, 38]. Long  
5 lists may lead to distraction or to unnecessary diagnostic with increased risk for  
6 iatrogenic injuries and costs. In general, despite the given potential efficacy of DDSS,  
7 widespread acceptance for implementation of DDSS into the routine clinical practice is  
8 evolving scarcely [44]. Studies focusing on AI-based diagnostic tools are generally  
9 designed heterogeneously and are often of poor quality, making it difficult to  
10 recommend widespread evidence-based clinical application [21, 25]. While most of the  
11 current trials demonstrated high diagnostic accuracy in retrospective and simulated  
12 cases, only few studies evaluated their performance in real clinical settings, particularly  
13 in high stress environments like ERs. Thus, further validations in prospective studies  
14 are required to investigate the diagnostic efficiency and utility of DDSS and their impact  
15 on routine clinical decision-making and patient outcome.

### 26 **Trial status**

27  
28 Ethical approval for this trial was granted by an independent ethics committee (IEC) of  
29 the Goethe-University Frankfurt on 9<sup>th</sup> April 2020 and anticipated trial start date is  
30 September 2020.

### 34 **Abbreviations**

35  
36 AI, Artificial Intelligence; App, Application; CCI, Comprehensive Complication Index;  
37 CDC, Clavien-Dindo classification; DRKS, Deutsches Register Klinische Studien  
38 (German Clinical Trials Register); eCRF, electronic case report form; DDSS,  
39 Diagnostic Decision Support System; ER, Emergency Room; EHR, Electronic Health  
40 Record; FU, Follow-Up; ICD-10, International Classification of Diseases; ICH-GCP,  
41 International Conference of Harmonisation, Good Clinical Practice; IEC, Independent  
42 ethics committee; OPS, Operations and Procedures; RAI-C, Risk Analysis Index-C  
43 score.

### 51 **Acknowledgments**

52  
53 We would like to thank Rene Wendel, Doreen Giannico, Dr. Johannes Masseli, Prof.  
54 Stefan Zeuzem, and the whole administrative and medical team of the central  
55 emergency room of the Frankfurt University Hospital for their support.

56  
57 We further are grateful for our established scientific support with the Barmer health  
58 care insurance company.  
59  
60



## **Funding**

There is no funding for this trial from third parties or grants. This is an investigator-initiated trial.

## **Competing interest**

No competing interests were detected for the specific trial.

## **Author Contributions**

SFF has written the manuscript, was involved in writing the protocol, and is the clinical lead surgeon for the trial.

NF performed the sample size calculation for the trial and was involved in drafting the protocol and the manuscript.

MvW supported the trial as Chief Medical Informatics Officer (CMIO) of the hospital, and was involved in drafting the protocol and the manuscript

CD and DM were involved in creating the idea and drafting the protocol and the manuscript and prepared the CRF logistics.

UK is the quality manager of the surgical department and supervised implementation of the project in the ER.

UM is the BARMER health insurance representative and is an external advisor to the trial. She drafted the protocol and the manuscript.

LA, PB, PS are medical students triaging the patients and putting up logistics in the ER. They all were involved in creating the idea and shaping the project.

WOB gave valuable input into the project, supports it majorly as chair of the department, and creates a culture for innovative projects. He further drafted the protocol and manuscript.

AAS had the idea for the project, leads the trial group and links all parties involved. He is the responsible principal investigator for the trial.

## **Availability of data and materials**

Data and material will be available after an adequate research proposal has been made and reviewed by the responsible persons at the University. The requests will be forwarded to our Ethics committee and the requesting party will be responsible to get

1  
2  
3 permission to do posthoc analysis and will be also liable for any costs arising from the  
4 requests.  
5

6  
7 **Consent for publication**  
8

9 All authors read and consented to the publication of the current version of this  
10 manuscript.  
11  
12  
13  
14  
15  
16  
17  
18  
19  
20  
21  
22  
23  
24  
25  
26  
27  
28  
29  
30  
31  
32  
33  
34  
35  
36  
37  
38  
39  
40  
41  
42  
43  
44  
45  
46  
47  
48  
49  
50  
51  
52  
53  
54  
55  
56  
57  
58  
59  
60

For peer review only

## References

1. Balla J, Heneghan C, Goyder C, Thompson M. Identifying early warning signs for diagnostic errors in primary care: a qualitative study. *BMJ Open* 2012.
2. World Health Organization. Patient Safety and Risk Management Service Delivery and Safety. Accessed Sept 2019.  
[https://www.who.int/features/factfiles/patient\\_safety/en/](https://www.who.int/features/factfiles/patient_safety/en/).
3. Leape LL, Brennan TA, Laird N, Lawthers AG, Localio AR, Barnes BA, et al. The nature of adverse events in hospitalized patients. Results of the Harvard Medical Practice Study II. *N Engl J Med*. 1991;324.
4. Kohn LT, Corrigan JM, Donaldson MS, editors. *To Err is Human: Building a Safer Health System*. Washington (DC); 2000.
5. Bhasale AL, Miller GC, Reid SE, Britt HC. Analysing potential harm in Australian general practice: an incident-monitoring study. *Med J Aust*. 1998;169.
6. Studdert DM, Mello MM, Gawande AA, Gandhi TK, Kachalia A, Yoon C, et al. Claims, errors, and compensation payments in medical malpractice litigation. *N Engl J Med*. 2006;354.
7. Berner ES, Graber ML. Overconfidence as a cause of diagnostic error in medicine. *Am J Med*. 2008;121.
8. Graber ML, Franklin N, Gordon R. Diagnostic error in internal medicine. *Arch Intern Med*. 2005;165.
9. Hautz SC, Schuler L, Kämmer JE, Schaubert SK, Ricklin ME, Sauter TC, et al. Factors predicting a change in diagnosis in patients hospitalised through the emergency room: a prospective observational study. *BMJ Open*. 2016;6.
10. Morley C, Unwin M, Peterson GM, Stankovich J, Kinsman L. Emergency department crowding: A systematic review of causes, consequences and solutions. *PLoS ONE*. 2018;13.
11. Bernhard M, Raatz C, Zahn P, Merker A, Gries A. Validity of admission diagnoses as process-driving criteria. Influence on length of stay and consultation rate in emergency departments. *Anaesthesist*. 2013;62.
12. Ben-Assuli O, Sagi D, Leshno M, Ironi A, Ziv A. Improving diagnostic accuracy using EHR in emergency departments: A simulation-based study. *J Biomed Inform*. 2015;55.

13. Eames J, Eisenman A, Schuster RJ. Disagreement between emergency department admission diagnosis and hospital discharge diagnosis: mortality and morbidity. *Diagnosis (Berl)*. 2016;3.
14. Chiu HS, Chan KF, Chung CH, Ma K, Au KW. A Comparison of Emergency Department Admission Diagnoses and Discharge Diagnoses: Retrospective Study. *Hong Kong Journal of Emergency Medicine*. 2003;10.
15. Macaluso CR, McNamara RM. Evaluation and management of acute abdominal pain in the emergency department. *Int J Gen Med*. 2012;5.
16. Kryzauskas M, Danys D, Poskus T, Mikalauskas S, Poskus E, Jotautas V, et al. Is acute appendicitis still misdiagnosed? *Open Med (Wars)*. 2016;11.
17. McWilliams A, Tapp H, Barker J, Dulin M. Cost analysis of the use of emergency departments for primary care services in Charlotte, North Carolina. *N C Med J*. 2011;72.
18. Johnson T, McNutt R, Odwazny R, Patel D, Baker S. Discrepancy between admission and discharge diagnoses as a predictor of hospital length of stay. *J Hosp Med*. 2009;4.
19. Mistry B, Stewart De Ramirez S, Kelen G, Schmitz PSK, Balhara KS, Levin S, et al. Accuracy and Reliability of Emergency Department Triage Using the Emergency Severity Index: An International Multicenter Assessment. *Ann Emerg Med*. 2018;71.
20. Riches N, Panagioti M, Alam R, Cheraghi-Sohi S, Campbell S, Esmail A, Bower P. The Effectiveness of Electronic Differential Diagnoses (DDX) Generators: A Systematic Review and Meta-Analysis. *PLoS ONE*. 2016;11.
21. Middleton B, Sittig DF, Wright A. Clinical Decision Support: a 25 Year Retrospective and a 25 Year Vision. *Yearb Med Inform*. 2016;Suppl 1.
22. Ronicke S, Hirsch MC, Türk E, Larionov K, Tientcheu D, Wagner AD. Can a decision support system accelerate rare disease diagnosis? Evaluating the potential impact of Ada DX in a retrospective study. *Orphanet journal of rare diseases* 2019.
23. Jungmann SM, Klan T, Kuhn S, Jungmann F. Accuracy of a Chatbot (Ada) in the Diagnosis of Mental Disorders: Comparative Case Study With Lay and Expert Users. *JMIR Form Res*. 2019;3.
24. El-Kareh R, Hasan O, Schiff GD. Use of health information technology to reduce diagnostic errors. *BMJ Qual Saf*. 2013;22 Suppl 2.

- 1
- 2
- 3 25. Graber ML, Mathew A. Performance of a web-based clinical diagnosis support
- 4 system for internists. *J Gen Intern Med.* 2008;23 Suppl 1.
- 5
- 6 26. Montazeri M, Multmeier J, Novorol C, Upadhyay S, Wicks P, Gilbert S. The
- 7 potential for digital patient symptom recording through symptom assessment
- 8 applications to optimize patient flow and reduce waiting times in Urgent Care
- 9 Centers: a simulation study; 2020.
- 10
- 11 27. Miller S, Gilbert S, Virani V, Wicks P. Patients' Utilization and Perception of an
- 12 Artificial Intelligence-Based Symptom Assessment and Advice Technology in a
- 13 British Primary Care Waiting Room: Exploratory Pilot Study. *JMIR Hum Factors.*
- 14 2020;7.
- 15
- 16 28. Mehl A, Bergey F, Cawley C, Gilsdorf A. Syndromic surveillance insights from a
- 17 symptom assessment app before and during COVID-19 measures in Germany
- 18 and the United Kingdom: results from repeated cross-sectional analyses; 2020.
- 19
- 20 29. Knitza J, Callhoff J, Chehab G, Hueber A, Kiltz U, Kleyer A, et al. Positionspapier
- 21 der Kommission Digitale Rheumatologie der Deutschen Gesellschaft für
- 22 Rheumatologie e. V.: Aufgaben, Ziele und Perspektiven für eine moderne
- 23 Rheumatologie. *Z Rheumatol.* 2020;79.
- 24
- 25 30. Hirsch MC, Ronicke S, Krusche M, Wagner AD. Rare diseases 2030: how
- 26 augmented AI will support diagnosis and treatment of rare diseases in the future.
- 27 *Annals of the rheumatic diseases* 2020.
- 28
- 29 31. Gilbert S, Mehl A, Baluch A, Cawley C, Challiner J, Fraser H, et al. Original
- 30 research: How accurate are digital symptom assessment apps for suggesting
- 31 conditions and urgency advice?: a clinical vignettes comparison to GPs; 2020.
- 32
- 33 32. Ceney A, Tolond S, Glowinski A, Marks B, Swift S, Palser T. Accuracy of online
- 34 symptom checkers and the potential impact on service utilisation; 2020.
- 35
- 36 33. Charlson M, Szatrowski TP, Peterson J, Gold J. Validation of a combined
- 37 comorbidity index. *J Clin Epidemiol.* 1994;47.
- 38
- 39 34. Hall DE, Arya S, Schmid KK, Blaser C, Carlson MA, Bailey TL, et al.
- 40 Development and Initial Validation of the Risk Analysis Index for Measuring
- 41 Frailty in Surgical Populations. *JAMA Surg.* 2017;152.
- 42
- 43 35. Hirsch JA, Leslie-Mazwi TM, Nicola GN, Oklu R, Schoppe KA, Silva E,
- 44 Manchikanti L. The ICD-10 system: a gift that keeps on taking. *J Neurointerv*
- 45 *Surg.* 2015;7.
- 46
- 47
- 48
- 49
- 50
- 51
- 52
- 53
- 54
- 55
- 56
- 57
- 58
- 59
- 60

- 1  
2  
3 36. Clavien P-A, Vetter D, Staiger RD, Slankamenac K, Mehra T, Graf R, Puhan MA.  
4 The Comprehensive Complication Index (CCI®): Added Value and Clinical  
5 Perspectives 3 Years "Down the Line". *Ann Surg.* 2017;265.  
6  
7
- 8 37. Clavien PA, Barkun J, Oliveira ML de, Vauthey JN, Dindo D, Schulick RD, et al.  
9 The Clavien-Dindo classification of surgical complications: five-year experience.  
10 *Ann Surg.* 2009;250.  
11  
12
- 13 38. Bond WF, Schwartz LM, Weaver KR, Levick D, Giuliano M, Graber ML.  
14 Differential diagnosis generators: an evaluation of currently available computer  
15 programs. *J Gen Intern Med.* 2012;27.  
16  
17
- 18 39. Stewart J, Sprivulis P, Dwivedi G. Artificial intelligence and machine learning in  
19 emergency medicine. *Emerg Med Australas.* 2018;30.  
20  
21
- 22 40. Levin S, Toerper M, Hamrock E, Hinson JS, Barnes S, Gardner H, et al. Machine-  
23 Learning-Based Electronic Triage More Accurately Differentiates Patients With  
24 Respect to Clinical Outcomes Compared With the Emergency Severity Index.  
25 *Ann Emerg Med.* 2018;71.  
26  
27
- 28 41. Ramnarayan P, Cronje N, Brown R, Negus R, Coode B, Moss P, et al. Validation  
29 of a diagnostic reminder system in emergency medicine: a multi-centre study.  
30 *Emerg Med J.* 2007;24.  
31  
32
- 33 42. Ekstrom HL, Kharbanda EO, Ballard DW, Vinson DR, Vazquez-Benitez G,  
34 Chettipally UK, et al. Development of a Clinical Decision Support System for  
35 Pediatric Abdominal Pain in Emergency Department Settings Across Two Health  
36 Systems Within the HCSRN. *EGEMS (Wash DC)* 2019.  
37  
38
- 39 43. Liang H, Tsui BY, Ni H, Valentim CCS, Baxter SL, Liu G, et al. Evaluation and  
40 accurate diagnoses of pediatric diseases using artificial intelligence. *Nat Med.*  
41 2019;25.  
42  
43
- 44 44. Shortliffe EH, Sepúlveda MJ. Clinical Decision Support in the Era of Artificial  
45 Intelligence. *JAMA.* 2018;320.  
46  
47  
48  
49  
50  
51  
52  
53  
54  
55  
56  
57  
58  
59  
60

1  
2  
3 **Figure legend**  
4

5 **Figure 1: Study flow chart of the eRadaR study.** CCI = Comprehensive complication  
6 index.  
7  
8  
9

10  
11  
12  
13  
14  
15  
16  
17  
18  
19  
20  
21  
22  
23  
24  
25  
26  
27  
28  
29  
30  
31  
32  
33  
34  
35  
36  
37  
38  
39  
40  
41  
42  
43  
44  
45  
46  
47  
48  
49  
50  
51  
52  
53  
54  
55  
56  
57  
58  
59  
60

For peer review only

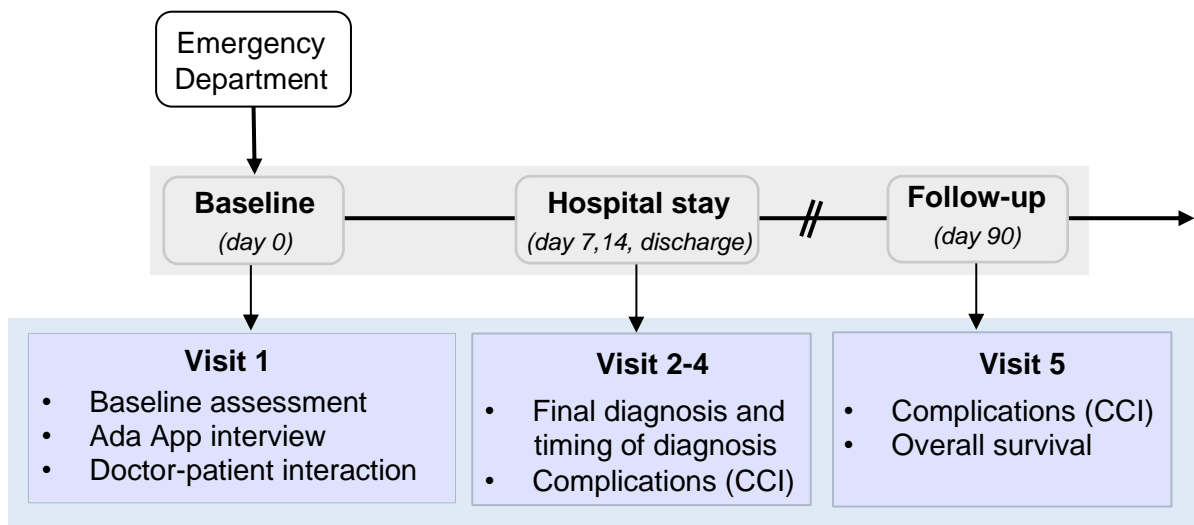

peer review only



# Reporting checklist for protocol of a clinical trial.

Based on the SPIRIT guidelines.

## Instructions to authors

Complete this checklist by entering the page numbers from your manuscript where readers will find each of the items listed below.

Your article may not currently address all the items on the checklist. Please modify your text to include the missing information. If you are certain that an item does not apply, please write "n/a" and provide a short explanation.

Upload your completed checklist as an extra file when you submit to a journal.

In your methods section, say that you used the SPIRIT reporting guidelines, and cite them as:

Chan A-W, Tetzlaff JM, Altman DG, Laupacis A, Gøtzsche PC, Krleža-Jerić K, Hróbjartsson A, Mann H, Dickersin K, Berlin J, Doré C, Parulekar W, Summerskill W, Groves T, Schulz K, Sox H, Rockhold FW, Rennie D, Moher D. SPIRIT 2013 Statement: Defining standard protocol items for clinical trials. *Ann Intern Med.* 2013;158(3):200-207

|                                   | Reporting Item                                                                                                                  | Page Number             |
|-----------------------------------|---------------------------------------------------------------------------------------------------------------------------------|-------------------------|
| <b>Administrative information</b> |                                                                                                                                 |                         |
| Title                             | <a href="#">#1</a> Descriptive title identifying the study design, population, interventions, and, if applicable, trial acronym | 1                       |
| Trial registration                | <a href="#">#2a</a> Trial identifier and registry name. If not yet registered, name of intended registry                        | 2                       |
| Trial registration: data set      | <a href="#">#2b</a> All items from the World Health Organization Trial Registration Data Set                                    | n/a                     |
| Protocol version                  | <a href="#">#3</a> Date and version identifier                                                                                  | 24/03/2020, version 2.0 |
| Funding                           | <a href="#">#4</a> Sources and types of financial, material, and other support                                                  | 15                      |
| Roles and                         | <a href="#">#5a</a> Names, affiliations, and roles of protocol contributors                                                     | 1, 15                   |

responsibilities:

contributorship

Roles and

responsibilities:

sponsor contact

information

[#5b](#)

Name and contact information for the trial sponsor

1

Roles and

responsibilities:

sponsor and funder

[#5c](#)

Role of study sponsor and funders, if any, in study design; collection, management, analysis, and interpretation of data; writing of the report; and the decision to submit the report for publication, including whether they will have ultimate authority over any of these activities

n/a, no  
sponsors or  
funders

Roles and

responsibilities:

committees

[#5d](#)

Composition, roles, and responsibilities of the coordinating centre, steering committee, endpoint adjudication committee, data management team, and other individuals or groups overseeing the trial, if applicable (see Item 21a for data monitoring committee)

n/a

## Introduction

Background and

rationale

[#6a](#)

Description of research question and justification for undertaking the trial, including summary of relevant studies (published and unpublished) examining benefits and harms for each intervention

4-5

Background and

rationale: choice of

comparators

[#6b](#)

Explanation for choice of comparators

n/a

Objectives

[#7](#)

Specific objectives or hypotheses

2

Trial design

[#8](#)

Description of trial design including type of trial (eg, parallel group, crossover, factorial, single group), allocation ratio, and framework (eg, superiority, equivalence, non-inferiority, exploratory)

6-9

## Methods:

Participants,

interventions, and

outcomes

|    |                                 |                      |                                                                                                                                                                                                                                                                                                                                                                                |                               |
|----|---------------------------------|----------------------|--------------------------------------------------------------------------------------------------------------------------------------------------------------------------------------------------------------------------------------------------------------------------------------------------------------------------------------------------------------------------------|-------------------------------|
| 1  | Study setting                   | <a href="#">#9</a>   | Description of study settings (eg, community clinic, academic hospital) and list of countries where data will be collected. Reference to where list of study sites can be obtained                                                                                                                                                                                             | 6                             |
| 2  |                                 |                      |                                                                                                                                                                                                                                                                                                                                                                                |                               |
| 3  |                                 |                      |                                                                                                                                                                                                                                                                                                                                                                                |                               |
| 4  |                                 |                      |                                                                                                                                                                                                                                                                                                                                                                                |                               |
| 5  |                                 |                      |                                                                                                                                                                                                                                                                                                                                                                                |                               |
| 6  |                                 |                      |                                                                                                                                                                                                                                                                                                                                                                                |                               |
| 7  |                                 |                      |                                                                                                                                                                                                                                                                                                                                                                                |                               |
| 8  | Eligibility criteria            | <a href="#">#10</a>  | Inclusion and exclusion criteria for participants. If applicable, eligibility criteria for study centres and individuals who will perform the interventions (eg, surgeons, psychotherapists)                                                                                                                                                                                   | 6                             |
| 9  |                                 |                      |                                                                                                                                                                                                                                                                                                                                                                                |                               |
| 10 |                                 |                      |                                                                                                                                                                                                                                                                                                                                                                                |                               |
| 11 |                                 |                      |                                                                                                                                                                                                                                                                                                                                                                                |                               |
| 12 |                                 |                      |                                                                                                                                                                                                                                                                                                                                                                                |                               |
| 13 |                                 |                      |                                                                                                                                                                                                                                                                                                                                                                                |                               |
| 14 |                                 |                      |                                                                                                                                                                                                                                                                                                                                                                                |                               |
| 15 | Interventions: description      | <a href="#">#11a</a> | Interventions for each group with sufficient detail to allow replication, including how and when they will be administered                                                                                                                                                                                                                                                     | n/a, no interventions planned |
| 16 |                                 |                      |                                                                                                                                                                                                                                                                                                                                                                                |                               |
| 17 |                                 |                      |                                                                                                                                                                                                                                                                                                                                                                                |                               |
| 18 |                                 |                      |                                                                                                                                                                                                                                                                                                                                                                                |                               |
| 19 |                                 |                      |                                                                                                                                                                                                                                                                                                                                                                                |                               |
| 20 | Interventions: modifications    | <a href="#">#11b</a> | Criteria for discontinuing or modifying allocated interventions for a given trial participant (eg, drug dose change in response to harms, participant request, or improving / worsening disease)                                                                                                                                                                               | n/a                           |
| 21 |                                 |                      |                                                                                                                                                                                                                                                                                                                                                                                |                               |
| 22 |                                 |                      |                                                                                                                                                                                                                                                                                                                                                                                |                               |
| 23 |                                 |                      |                                                                                                                                                                                                                                                                                                                                                                                |                               |
| 24 |                                 |                      |                                                                                                                                                                                                                                                                                                                                                                                |                               |
| 25 |                                 |                      |                                                                                                                                                                                                                                                                                                                                                                                |                               |
| 26 |                                 |                      |                                                                                                                                                                                                                                                                                                                                                                                |                               |
| 27 | Interventions: adherence        | <a href="#">#11c</a> | Strategies to improve adherence to intervention protocols, and any procedures for monitoring adherence (eg, drug tablet return; laboratory tests)                                                                                                                                                                                                                              | n/a                           |
| 28 |                                 |                      |                                                                                                                                                                                                                                                                                                                                                                                |                               |
| 29 |                                 |                      |                                                                                                                                                                                                                                                                                                                                                                                |                               |
| 30 |                                 |                      |                                                                                                                                                                                                                                                                                                                                                                                |                               |
| 31 |                                 |                      |                                                                                                                                                                                                                                                                                                                                                                                |                               |
| 32 | Interventions: concomitant care | <a href="#">#11d</a> | Relevant concomitant care and interventions that are permitted or prohibited during the trial                                                                                                                                                                                                                                                                                  | n/a                           |
| 33 |                                 |                      |                                                                                                                                                                                                                                                                                                                                                                                |                               |
| 34 |                                 |                      |                                                                                                                                                                                                                                                                                                                                                                                |                               |
| 35 |                                 |                      |                                                                                                                                                                                                                                                                                                                                                                                |                               |
| 36 | Outcomes                        | <a href="#">#12</a>  | Primary, secondary, and other outcomes, including the specific measurement variable (eg, systolic blood pressure), analysis metric (eg, change from baseline, final value, time to event), method of aggregation (eg, median, proportion), and time point for each outcome. Explanation of the clinical relevance of chosen efficacy and harm outcomes is strongly recommended | 9-10                          |
| 37 |                                 |                      |                                                                                                                                                                                                                                                                                                                                                                                |                               |
| 38 |                                 |                      |                                                                                                                                                                                                                                                                                                                                                                                |                               |
| 39 |                                 |                      |                                                                                                                                                                                                                                                                                                                                                                                |                               |
| 40 |                                 |                      |                                                                                                                                                                                                                                                                                                                                                                                |                               |
| 41 |                                 |                      |                                                                                                                                                                                                                                                                                                                                                                                |                               |
| 42 |                                 |                      |                                                                                                                                                                                                                                                                                                                                                                                |                               |
| 43 |                                 |                      |                                                                                                                                                                                                                                                                                                                                                                                |                               |
| 44 |                                 |                      |                                                                                                                                                                                                                                                                                                                                                                                |                               |
| 45 |                                 |                      |                                                                                                                                                                                                                                                                                                                                                                                |                               |
| 46 |                                 |                      |                                                                                                                                                                                                                                                                                                                                                                                |                               |
| 47 |                                 |                      |                                                                                                                                                                                                                                                                                                                                                                                |                               |
| 48 |                                 |                      |                                                                                                                                                                                                                                                                                                                                                                                |                               |
| 49 | Participant timeline            | <a href="#">#13</a>  | Time schedule of enrolment, interventions (including any run-ins and washouts), assessments, and visits for participants. A schematic diagram is highly recommended (see Figure)                                                                                                                                                                                               | 6-8                           |
| 50 |                                 |                      |                                                                                                                                                                                                                                                                                                                                                                                |                               |
| 51 |                                 |                      |                                                                                                                                                                                                                                                                                                                                                                                |                               |
| 52 |                                 |                      |                                                                                                                                                                                                                                                                                                                                                                                |                               |
| 53 |                                 |                      |                                                                                                                                                                                                                                                                                                                                                                                |                               |
| 54 |                                 |                      |                                                                                                                                                                                                                                                                                                                                                                                |                               |
| 55 |                                 |                      |                                                                                                                                                                                                                                                                                                                                                                                |                               |
| 56 | Sample size                     | <a href="#">#14</a>  | Estimated number of participants needed to achieve study objectives and how it was determined, including clinical and statistical assumptions                                                                                                                                                                                                                                  | 11-12                         |
| 57 |                                 |                      |                                                                                                                                                                                                                                                                                                                                                                                |                               |
| 58 |                                 |                      |                                                                                                                                                                                                                                                                                                                                                                                |                               |
| 59 |                                 |                      |                                                                                                                                                                                                                                                                                                                                                                                |                               |
| 60 |                                 |                      |                                                                                                                                                                                                                                                                                                                                                                                |                               |

supporting any sample size calculations

1  
2  
3 Recruitment [#15](#) Strategies for achieving adequate participant 11-12  
4 enrolment to reach target sample size  
5

6 **Methods:**

7 **Assignment of**  
8 **interventions (for**  
9 **controlled trials)**  
10  
11

12  
13 Allocation: sequence [#16a](#) Method of generating the allocation sequence (eg, n/a  
14 generation computer-generated random numbers), and list of  
15 of any factors for stratification. To reduce predictability  
16 of a random sequence, details of any planned  
17 restriction (eg, blocking) should be provided in a  
18 separate document that is unavailable to those who  
19 enrol participants or assign interventions  
20  
21  
22

23  
24 Allocation [#16b](#) Mechanism of implementing the allocation sequence n/a  
25 concealment (eg, central telephone; sequentially numbered,  
26 opaque, sealed envelopes), describing any steps to  
27 conceal the sequence until interventions are  
28 assigned  
29  
30  
31

32  
33 Allocation: [#16c](#) Who will generate the allocation sequence, who will n/a  
34 implementation enrol participants, and who will assign participants to  
35 interventions  
36  
37

38 Blinding (masking) [#17a](#) Who will be blinded after assignment to interventions n/a  
39 (eg, trial participants, care providers, outcome  
40 assessors, data analysts), and how  
41  
42

43 Blinding (masking): [#17b](#) If blinded, circumstances under which unblinding is n/a  
44 emergency permissible, and procedure for revealing a  
45 unblinding participant's allocated intervention during the trial  
46  
47

48 **Methods: Data**  
49 **collection,**  
50 **management, and**  
51 **analysis**  
52  
53

54  
55 Data collection plan [#18a](#) Plans for assessment and collection of outcome, 10-11  
56 baseline, and other trial data, including any related  
57 processes to promote data quality (eg, duplicate  
58  
59

measurements, training of assessors) and a description of study instruments (eg, questionnaires, laboratory tests) along with their reliability and validity, if known. Reference to where data collection forms can be found, if not in the protocol

|    |                        |                      |                                                           |
|----|------------------------|----------------------|-----------------------------------------------------------|
| 1  |                        |                      |                                                           |
| 2  |                        |                      |                                                           |
| 3  |                        |                      |                                                           |
| 4  |                        |                      |                                                           |
| 5  |                        |                      |                                                           |
| 6  |                        |                      |                                                           |
| 7  |                        |                      |                                                           |
| 8  |                        |                      |                                                           |
| 9  | Data collection plan:  | <a href="#">#18b</a> | Plans to promote participant retention and complete       |
| 10 | retention              |                      | follow-up, including list of any outcome data to be       |
| 11 |                        |                      | collected for participants who discontinue or deviate     |
| 12 |                        |                      | from intervention protocols                               |
| 13 |                        |                      |                                                           |
| 14 |                        |                      |                                                           |
| 15 | Data management        | <a href="#">#19</a>  | Plans for data entry, coding, security, and storage,      |
| 16 |                        |                      | including any related processes to promote data           |
| 17 |                        |                      | quality (eg, double data entry; range checks for data     |
| 18 |                        |                      | values). Reference to where details of data               |
| 19 |                        |                      | management procedures can be found, if not in the         |
| 20 |                        |                      | protocol                                                  |
| 21 |                        |                      |                                                           |
| 22 |                        |                      |                                                           |
| 23 |                        |                      |                                                           |
| 24 |                        |                      |                                                           |
| 25 | Statistics: outcomes   | <a href="#">#20a</a> | Statistical methods for analysing primary and             |
| 26 |                        |                      | secondary outcomes. Reference to where other              |
| 27 |                        |                      | details of the statistical analysis plan can be found, if |
| 28 |                        |                      | not in the protocol                                       |
| 29 |                        |                      |                                                           |
| 30 |                        |                      |                                                           |
| 31 |                        |                      |                                                           |
| 32 | Statistics: additional | <a href="#">#20b</a> | Methods for any additional analyses (eg, subgroup         |
| 33 | analyses               |                      | and adjusted analyses)                                    |
| 34 |                        |                      |                                                           |
| 35 |                        |                      |                                                           |
| 36 | Statistics: analysis   | <a href="#">#20c</a> | Definition of analysis population relating to protocol    |
| 37 | population and         |                      | non-adherence (eg, as randomised analysis), and           |
| 38 | missing data           |                      | any statistical methods to handle missing data (eg,       |
| 39 |                        |                      | multiple imputation)                                      |
| 40 |                        |                      |                                                           |
| 41 |                        |                      |                                                           |
| 42 | <b>Methods:</b>        |                      |                                                           |
| 43 | <b>Monitoring</b>      |                      |                                                           |
| 44 |                        |                      |                                                           |
| 45 |                        |                      |                                                           |
| 46 | Data monitoring:       | <a href="#">#21a</a> | Composition of data monitoring committee (DMC);           |
| 47 | formal committee       |                      | summary of its role and reporting structure; statement    |
| 48 |                        |                      | of whether it is independent from the sponsor and         |
| 49 |                        |                      | competing interests; and reference to where further       |
| 50 |                        |                      | details about its charter can be found, if not in the     |
| 51 |                        |                      | protocol. Alternatively, an explanation of why a DMC      |
| 52 |                        |                      | is not needed                                             |
| 53 |                        |                      |                                                           |
| 54 |                        |                      |                                                           |
| 55 |                        |                      |                                                           |
| 56 |                        |                      |                                                           |
| 57 |                        |                      |                                                           |
| 58 | Data monitoring:       | <a href="#">#21b</a> | Description of any interim analyses and stopping          |
| 59 |                        |                      |                                                           |
| 60 |                        |                      |                                                           |

|    |                      |                      |                                                         |       |
|----|----------------------|----------------------|---------------------------------------------------------|-------|
| 1  | interim analysis     |                      | guidelines, including who will have access to these     |       |
| 2  |                      |                      | interim results and make the final decision to          |       |
| 3  |                      |                      | terminate the trial                                     |       |
| 4  |                      |                      |                                                         |       |
| 5  | Harms                | <a href="#">#22</a>  | Plans for collecting, assessing, reporting, and         | 10    |
| 6  |                      |                      | managing solicited and spontaneously reported           |       |
| 7  |                      |                      | adverse events and other unintended effects of trial    |       |
| 8  |                      |                      | interventions or trial conduct                          |       |
| 9  |                      |                      |                                                         |       |
| 10 |                      |                      |                                                         |       |
| 11 |                      |                      |                                                         |       |
| 12 | Auditing             | <a href="#">#23</a>  | Frequency and procedures for auditing trial conduct,    | n/a   |
| 13 |                      |                      | if any, and whether the process will be independent     |       |
| 14 |                      |                      | from investigators and the sponsor                      |       |
| 15 |                      |                      |                                                         |       |
| 16 |                      |                      |                                                         |       |
| 17 | <b>Ethics and</b>    |                      |                                                         |       |
| 18 | <b>dissemination</b> |                      |                                                         |       |
| 19 |                      |                      |                                                         |       |
| 20 |                      |                      |                                                         |       |
| 21 | Research ethics      | <a href="#">#24</a>  | Plans for seeking research ethics committee /           | 2,12  |
| 22 | approval             |                      | institutional review board (REC / IRB) approval         |       |
| 23 |                      |                      |                                                         |       |
| 24 |                      |                      |                                                         |       |
| 25 | Protocol             | <a href="#">#25</a>  | Plans for communicating important protocol              | 2     |
| 26 | amendments           |                      | modifications (eg, changes to eligibility criteria,     |       |
| 27 |                      |                      | outcomes, analyses) to relevant parties (eg,            |       |
| 28 |                      |                      | investigators, REC / IRBs, trial participants, trial    |       |
| 29 |                      |                      | registries, journals, regulators)                       |       |
| 30 |                      |                      |                                                         |       |
| 31 |                      |                      |                                                         |       |
| 32 |                      |                      |                                                         |       |
| 33 | Consent or assent    | <a href="#">#26a</a> | Who will obtain informed consent or assent from         | 6,12  |
| 34 |                      |                      | potential trial participants or authorised surrogates,  |       |
| 35 |                      |                      | and how (see Item 32)                                   |       |
| 36 |                      |                      |                                                         |       |
| 37 |                      |                      |                                                         |       |
| 38 |                      |                      |                                                         |       |
| 39 | Consent or assent:   | <a href="#">#26b</a> | Additional consent provisions for collection and use    | n/a   |
| 40 | ancillary studies    |                      | of participant data and biological specimens in         |       |
| 41 |                      |                      | ancillary studies, if applicable                        |       |
| 42 |                      |                      |                                                         |       |
| 43 |                      |                      |                                                         |       |
| 44 | Confidentiality      | <a href="#">#27</a>  | How personal information about potential and            | 10-11 |
| 45 |                      |                      | enrolled participants will be collected, shared, and    |       |
| 46 |                      |                      | maintained in order to protect confidentiality before,  |       |
| 47 |                      |                      | during, and after the trial                             |       |
| 48 |                      |                      |                                                         |       |
| 49 |                      |                      |                                                         |       |
| 50 |                      |                      |                                                         |       |
| 51 | Declaration of       | <a href="#">#28</a>  | Financial and other competing interests for principal   | 15    |
| 52 | interests            |                      | investigators for the overall trial and each study site |       |
| 53 |                      |                      |                                                         |       |
| 54 |                      |                      |                                                         |       |
| 55 | Data access          | <a href="#">#29</a>  | Statement of who will have access to the final trial    | 15-16 |
| 56 |                      |                      | dataset, and disclosure of contractual agreements       |       |
| 57 |                      |                      | that limit such access for investigators                |       |
| 58 |                      |                      |                                                         |       |
| 59 |                      |                      |                                                         |       |
| 60 |                      |                      |                                                         |       |

|    |                       |                      |                                                            |       |
|----|-----------------------|----------------------|------------------------------------------------------------|-------|
| 1  | Ancillary and post    | <a href="#">#30</a>  | Provisions, if any, for ancillary and post-trial care, and | 15-16 |
| 2  | trial care            |                      | for compensation to those who suffer harm from trial       |       |
| 3  |                       |                      | participation                                              |       |
| 4  |                       |                      |                                                            |       |
| 5  |                       |                      |                                                            |       |
| 6  | Dissemination policy: | <a href="#">#31a</a> | Plans for investigators and sponsor to communicate         | 11,16 |
| 7  | trial results         |                      | trial results to participants, healthcare professionals,   |       |
| 8  |                       |                      | the public, and other relevant groups (eg, via             |       |
| 9  |                       |                      | publication, reporting in results databases, or other      |       |
| 10 |                       |                      | data sharing arrangements), including any publication      |       |
| 11 |                       |                      | restrictions                                               |       |
| 12 |                       |                      |                                                            |       |
| 13 |                       |                      |                                                            |       |
| 14 |                       |                      |                                                            |       |
| 15 |                       |                      |                                                            |       |
| 16 | Dissemination policy: | <a href="#">#31b</a> | Authorship eligibility guidelines and any intended use     | n/a   |
| 17 | authorship            |                      | of professional writers                                    |       |
| 18 |                       |                      |                                                            |       |
| 19 |                       |                      |                                                            |       |
| 20 | Dissemination policy: | <a href="#">#31c</a> | Plans, if any, for granting public access to the full      | n/a   |
| 21 | reproducible research |                      | protocol, participant-level dataset, and statistical code  |       |
| 22 |                       |                      |                                                            |       |
| 23 |                       |                      |                                                            |       |
| 24 | <b>Appendices</b>     |                      |                                                            |       |
| 25 |                       |                      |                                                            |       |
| 26 | Informed consent      | <a href="#">#32</a>  | Model consent form and other related documentation         | 6,12  |
| 27 | materials             |                      | given to participants and authorised surrogates            |       |
| 28 |                       |                      |                                                            |       |
| 29 |                       |                      |                                                            |       |
| 30 | Biological specimens  | <a href="#">#33</a>  | Plans for collection, laboratory evaluation, and           | n/a   |
| 31 |                       |                      | storage of biological specimens for genetic or             |       |
| 32 |                       |                      | molecular analysis in the current trial and for future     |       |
| 33 |                       |                      | use in ancillary studies, if applicable                    |       |
| 34 |                       |                      |                                                            |       |
| 35 |                       |                      |                                                            |       |

#### Notes:

- 39 • 3: 24/03/2020, version 2.0
- 40
- 41 • 5c: n/a, no sponsors or funders
- 42
- 43
- 44 • 11a: n/a, no interventions planned The SPIRIT checklist is distributed under the terms of the
- 45 Creative Commons Attribution License CC-BY-ND 3.0. This checklist was completed on 06. June
- 46 2020 using <https://www.goodreports.org/>, a tool made by the [EQUATOR Network](#) in collaboration
- 47 with [Penelope.ai](#)
- 48
- 49
- 50
- 51
- 52
- 53
- 54
- 55
- 56
- 57
- 58
- 59
